# Supplementary material
Source: Royal Society of Chemistry journal article supplement (doi:10.1039/d6cp00515b)
Supplement: d6cp00515b1.pdf [file d6cp00515b1.pdf]

***Supporting Information***  
***for***  
**Optimizing Triazine-Based Thermally Activated Delayed  
Fluorescence Molecules for Enhanced Organic Light-Emitting  
Diode Applications**

Masiyappan Karuppusamy<sup>a,b</sup>, Pandiyan Sivasakthi<sup>c</sup>, Pralok Kumar  
Samanta<sup>c\*</sup>, Natarajan Arul Murugan<sup>d</sup>, Shanmugam Easwaramoorthi<sup>b,e\*</sup> and  
Venkatesan Subramanian<sup>a,b,f\*</sup>

<sup>a</sup>Centre for High Computing, CSIR-Central Leather Research Institute (CSIR-CLRI), Sardar Patel Road, Adyar, Chennai - 600 020, Tamil Nadu, India.

<sup>b</sup>Academy of Scientific and Innovative Research (AcSIR), Ghaziabad - 201 002, Uttar Pradesh, India.

<sup>c</sup>Department of Chemistry, Birla Institute of Technology and Science (BITS) Pilani, Hyderabad Campus, Hyderabad - 500 078, India.

<sup>d</sup>Indraprastha Institute of Information Technology Delhi, Okhla Industrial Estate, New Delhi - 110 020, India.

<sup>e</sup>Inorganic and Physical Chemistry Laboratory, CSIR-Central Leather Research Institute (CSIR-CLRI), Sardar Patel Road, Adyar, Chennai - 600 020, Tamil Nadu, India.

<sup>f</sup>Department of Chemistry, Indian Institute of Technology - Madras, Chennai - 600 036, Tamil Nadu, India.

**Corresponding Authors:**

Venkatesan Subramanian - [subuchem@hotmail.com](mailto:subuchem@hotmail.com)

Shanmugam Easwaramoorthi - [moorthi.clri@csir.res.in](mailto:moorthi.clri@csir.res.in)

Pralok Kumar Samanta - [pralokkumar.samanta@hyderabad.bits-pilani.ac.in](mailto:pralokkumar.samanta@hyderabad.bits-pilani.ac.in)

| <b>Table of Contents</b> |                                                                                                                                                                                                                                                                                                                                      |                 |
|--------------------------|--------------------------------------------------------------------------------------------------------------------------------------------------------------------------------------------------------------------------------------------------------------------------------------------------------------------------------------|-----------------|
| <b>S. No.</b>            | <b>Title</b>                                                                                                                                                                                                                                                                                                                         | <b>Page No.</b> |
| <b>Figure S1</b>         | Atom labeling scheme used for defining bond lengths and dihedral angles.                                                                                                                                                                                                                                                             | S5              |
| <b>Table S1</b>          | Calculated bond lengths and dihedral angles for the ground-state ( $S_0$ ) geometries of the studied molecules in the gas phase and in toluene (PCM).                                                                                                                                                                                | S6              |
| <b>Table S2</b>          | Comparison of donor-acceptor dihedral angles ( $^\circ$ ) calculated at the B3LYP/6-31G(d) and B3LYP-D3(BJ)/6-31G(d) levels in toluene (PCM) for the studied molecules.                                                                                                                                                              | S17             |
| <b>Table S3</b>          | Calculated HOMO and LUMO energies and H-L gaps (eV) of the studied molecules in their ground ( $S_0$ ) state in the gas phase.                                                                                                                                                                                                       | S18             |
| <b>Table S4</b>          | Calculated singlet-triplet energy gaps ( $\Delta E_{ST}$ , eV) of the studied molecules in the gas phase and in toluene (PCM) at the M06-2X/6-31G(d) level of theory.                                                                                                                                                                | S19             |
| <b>Figure S2</b>         | Calculated singlet-triplet energy gaps ( $\Delta E_{ST}$ , eV) of the studied molecules in the gas phase at the M06-2X/6-31G(d) level of theory.                                                                                                                                                                                     | S20             |
| <b>Figure S3</b>         | NTOs corresponding to the $S_1$ and $T_1$ states at their respective optimized geometries in the gas phase, calculated at the M06-2X/6-31G(d) level of theory. The hole (hNTO) and electron (eNTO) orbitals with the largest contribution ( $v$ ) are shown below and above the arrows, respectively (isosurface value = 0.02 a.u.). | S22             |
| <b>Table S5</b>          | Calculated structural relaxation excited-state, RMSD, and Huang-Rhys (HR) factors of the studied molecules in the gas phase.                                                                                                                                                                                                         | S23             |
| <b>Table S6</b>          | Calculated spin-orbit coupling matrix elements (SOCME) between the $S_1$ and $T_1$ states at the optimized $T_1$ geometry in the gas phase.                                                                                                                                                                                          | S24             |
| <b>Table S7</b>          | Calculated charge transfer (CT) and local excitation (LE) contributions (%) for the $S_1$ and $T_1$ states of the studied molecules in the gas phase.                                                                                                                                                                                | S25             |
| <b>Table S8</b>          | Calculated charge transfer (CT) and local excitation (LE) contributions (%) for the $S_1$ and $T_1$ states of the studied molecules in toluene (PCM).                                                                                                                                                                                | S26             |
| <b>Table S9</b>          | Comparison of optical absorption energy ( $S_1$ -state) in nm using                                                                                                                                                                                                                                                                  | S27             |

|                  |                                                                             |     |
|------------------|-----------------------------------------------------------------------------|-----|
|                  | Toluene Solvent.                                                            |     |
| <b>Table S10</b> | Optimized Cartesian coordinates of $S_0$ geometries in toluene (PCM).       | S28 |
| <b>Table S11</b> | Optimized Cartesian coordinates of $T_1$ geometries in toluene (PCM).       | S46 |
| <b>Table S12</b> | Optimized Cartesian coordinates of donor units (Figure 2) in the gas phase. | S66 |

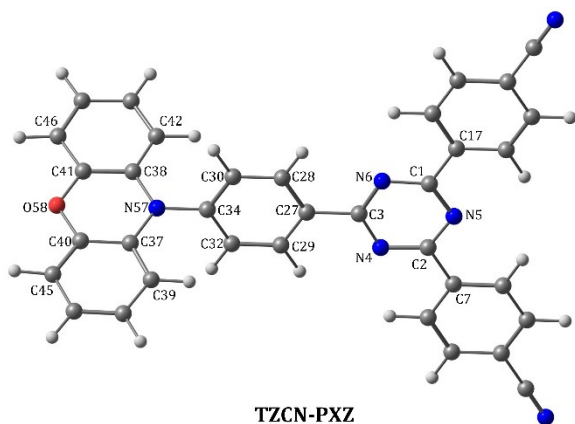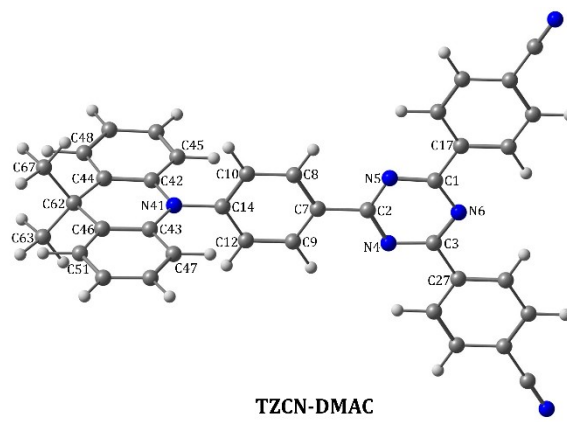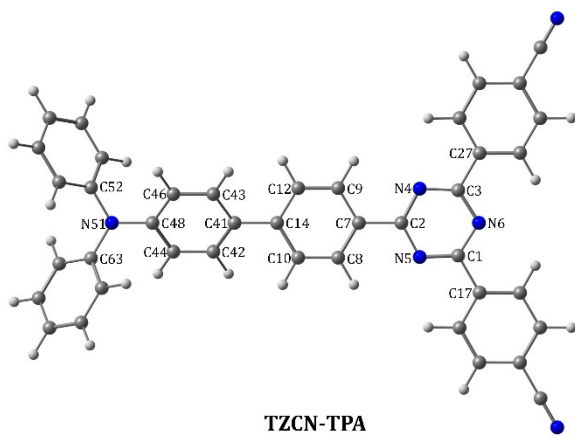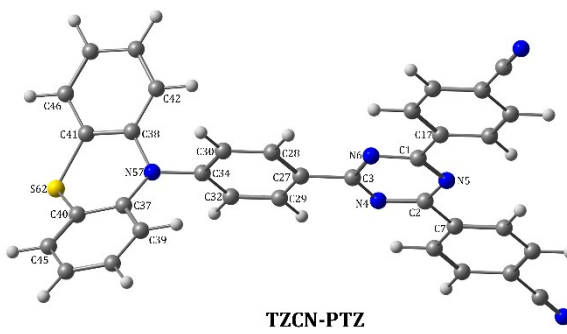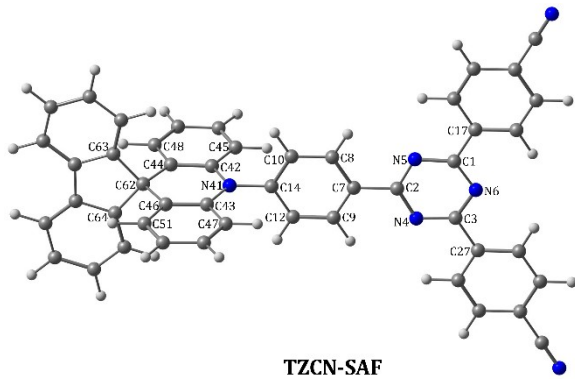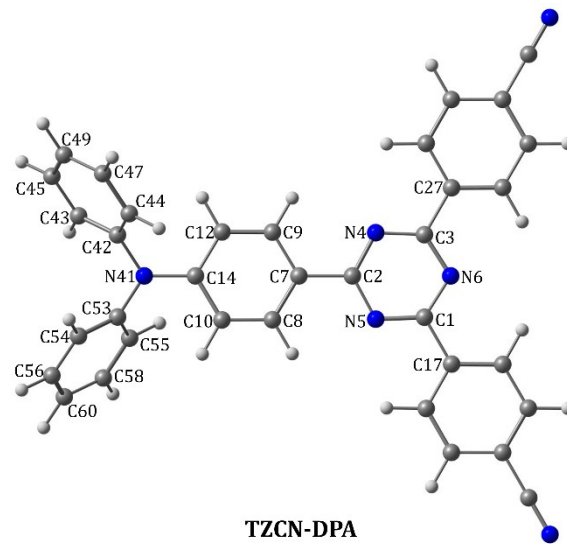

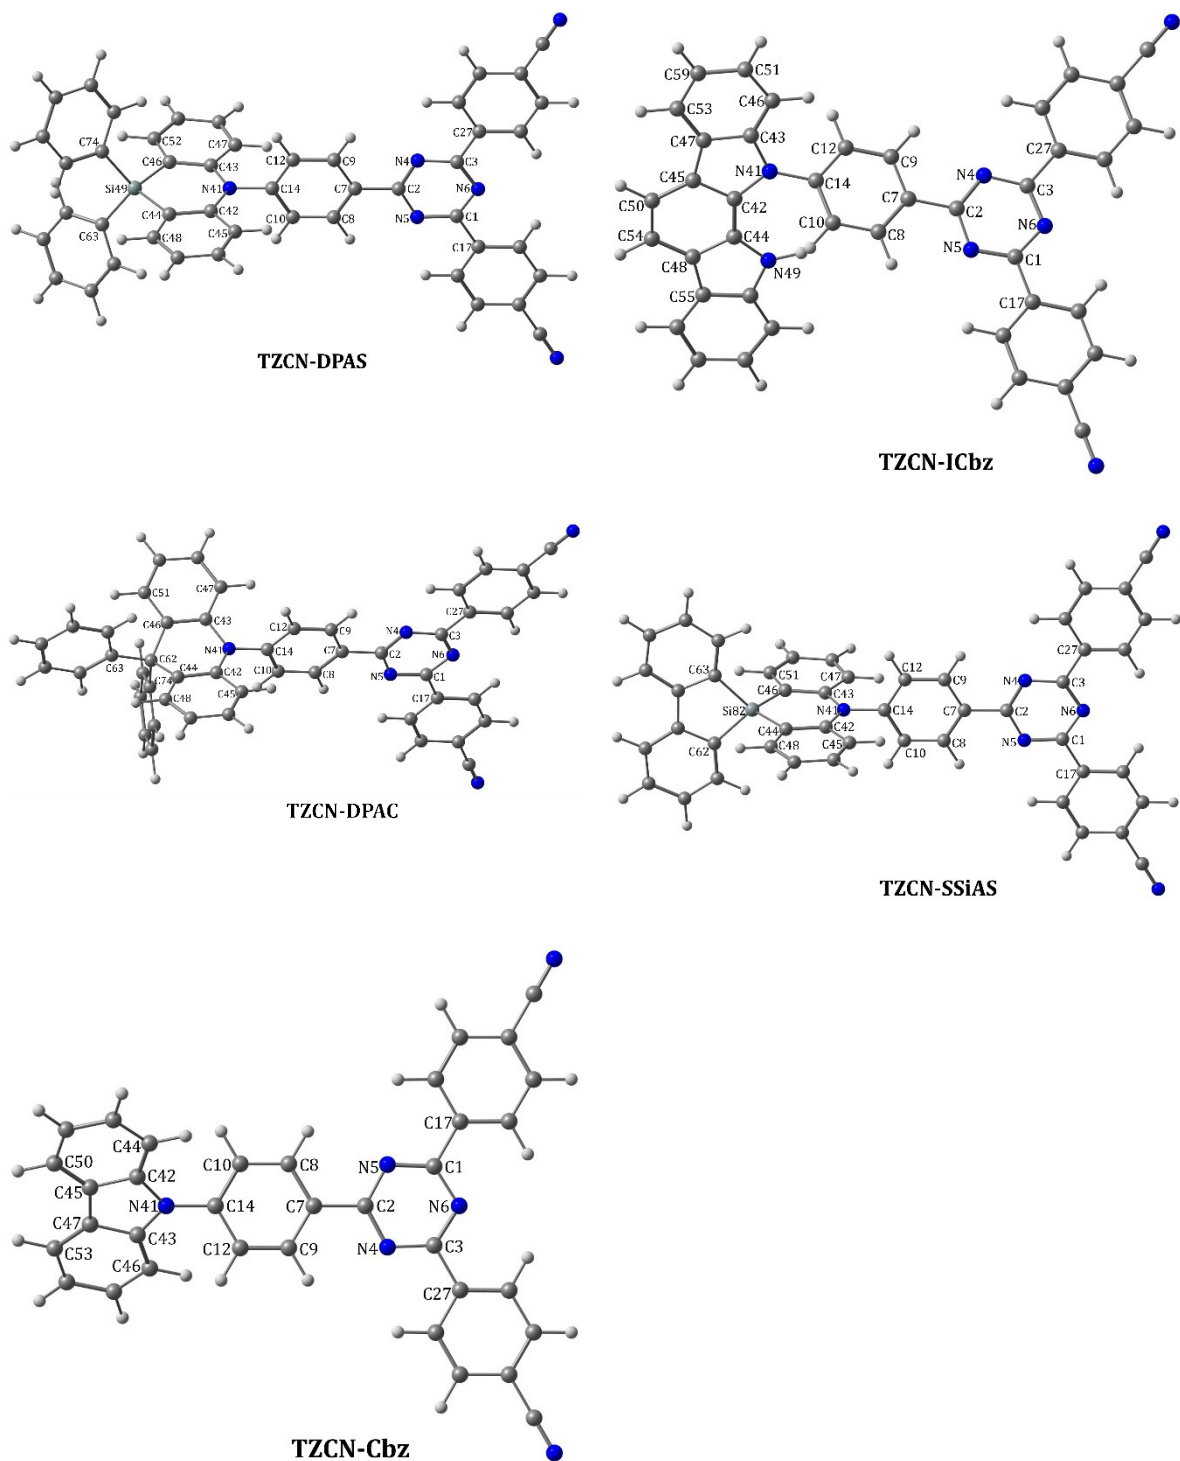

**Figure S1.** Atom labeling scheme used for defining bond lengths and dihedral angles.

**Table S1.** Calculated bond lengths and dihedral angles for the ground-state ( $S_0$ ) geometries of the studied molecules in the gas phase and in toluene (PCM).

| TZCN-PXZ           | Bond Length (Å) |               |
|--------------------|-----------------|---------------|
|                    | Gas Phase       | Solvent Phase |
| C41-C38            | 1.407           | 1.407         |
| C40-C37            | 1.407           | 1.407         |
| C41-O58            | 1.380           | 1.381         |
| C40-O58            | 1.380           | 1.381         |
| C38-N57            | 1.413           | 1.410         |
| C37-N57            | 1.413           | 1.410         |
| C41-C46            | 1.387           | 1.387         |
| C40-C45            | 1.387           | 1.387         |
| C38-C42            | 1.399           | 1.399         |
| C37-C39            | 1.399           | 1.399         |
| N57-C34            | 1.426           | 1.430         |
| C34-C30            | 1.401           | 1.400         |
| C34-C32            | 1.401           | 1.400         |
| C30-C28            | 1.390           | 1.391         |
| C32-C29            | 1.390           | 1.391         |
| C28-C27            | 1.404           | 1.404         |
| C29-C27            | 1.404           | 1.404         |
| C27-C3             | 1.480           | 1.481         |
| C3-N6              | 1.343           | 1.342         |
| C3-N4              | 1.343           | 1.342         |
| N6-C1              | 1.339           | 1.339         |
| N4-C2              | 1.339           | 1.339         |
| C1-N5              | 1.341           | 1.341         |
| C2-N5              | 1.341           | 1.341         |
| C1-C17             | 1.484           | 1.485         |
| C2-C7              | 1.484           | 1.485         |
| Dihedral Angle (°) |                 |               |
| C38-N57-C34-C30    | 72.54           | 80.37         |
| C37-N57-C34-C32    | 72.63           | 80.43         |
| C28-C27-C3-N6      | -0.75           | -0.43         |
| C29-C27-C3-N4      | -0.75           | -0.42         |

| TZCN-DMAC          | Bond Length (Å) |           |
|--------------------|-----------------|-----------|
|                    | Bond            | Gas Phase |
| C44-C42            | 1.410           | 1.410     |
| C46-C43            | 1.410           | 1.410     |
| C44-C62            | 1.533           | 1.533     |
| C46-C62            | 1.533           | 1.533     |
| C42-N41            | 1.409           | 1.408     |
| C43-N41            | 1.409           | 1.408     |
| C44-C48            | 1.401           | 1.401     |
| C46-C51            | 1.401           | 1.401     |
| C42-C45            | 1.409           | 1.409     |
| C43-C47            | 1.409           | 1.409     |
| C62-C67            | 1.553           | 1.553     |
| C62-C63            | 1.553           | 1.553     |
| N41-C14            | 1.433           | 1.434     |
| C14-C10            | 1.399           | 1.399     |
| C14-C12            | 1.399           | 1.399     |
| C10-C8             | 1.391           | 1.391     |
| C12-C9             | 1.391           | 1.391     |
| C8-C7              | 1.404           | 1.404     |
| C9-C7              | 1.404           | 1.404     |
| C7-C2              | 1.481           | 1.481     |
| C2-N5              | 1.342           | 1.342     |
| C2-N4              | 1.342           | 1.342     |
| N5-C1              | 1.339           | 1.339     |
| N4-C3              | 1.339           | 1.339     |
| C1-N6              | 1.341           | 1.341     |
| C3-N6              | 1.341           | 1.341     |
| C1-C17             | 1.484           | 1.485     |
| C3-C27             | 1.484           | 1.485     |
| Dihedral Angle (°) |                 |           |
| C42-N41-C14-C10    | 90.00           | 88.97     |
| C43-N41-C14-C12    | 90.00           | 88.97     |
| C8-C7-C2-N5        | 0.00            | -1.20     |
| C9-C7-C2-N4        | 0.00            | -1.20     |

| TZCN-TPA           | Bond Length (Å) |               |
|--------------------|-----------------|---------------|
|                    | Gas Phase       | Solvent Phase |
| N51-C52            | 1.424           | 1.425         |
| N51-C63            | 1.424           | 1.425         |
| N51-C48            | 1.412           | 1.412         |
| C48-C46            | 1.406           | 1.406         |
| C48-C44            | 1.406           | 1.406         |
| C46-C43            | 1.388           | 1.389         |
| C44-C42            | 1.388           | 1.389         |
| C43-C41            | 1.406           | 1.407         |
| C42-C41            | 1.406           | 1.407         |
| C41-C14            | 1.478           | 1.478         |
| C14-C12            | 1.408           | 1.409         |
| C14-C10            | 1.408           | 1.409         |
| C12-C9             | 1.388           | 1.388         |
| C10-C8             | 1.388           | 1.388         |
| C9-C7              | 1.404           | 1.405         |
| C8-C7              | 1.404           | 1.405         |
| C7-C2              | 1.474           | 1.474         |
| C2-N4              | 1.345           | 1.345         |
| C2-N5              | 1.345           | 1.345         |
| N4-C3              | 1.338           | 1.337         |
| N5-C1              | 1.338           | 1.337         |
| C3-N6              | 1.342           | 1.341         |
| C1-N6              | 1.342           | 1.341         |
| C3-C27             | 1.485           | 1.486         |
| C1-C17             | 1.485           | 1.486         |
| Dihedral Angle (°) |                 |               |
| C43-C41-C14-C12    | -33.35          | -32.57        |
| C42-C41-C14-C10    | -33.35          | -32.57        |
| C9-C7-C2-N4        | 0.00            | 0.09          |
| C8-C7-C2-N5        | 0.00            | 0.09          |

| TZCN-PTZ           | Bond Length (Å) |           |
|--------------------|-----------------|-----------|
|                    | Bond            | Gas Phase |
| C41-C38            | 1.408           | 1.408     |
| C40-C37            | 1.408           | 1.408     |
| C41-S62            | 1.780           | 1.781     |
| C40-S62            | 1.780           | 1.781     |
| C38-N57            | 1.422           | 1.421     |
| C37-N57            | 1.422           | 1.421     |
| C41-C46            | 1.395           | 1.395     |
| C40-C45            | 1.395           | 1.395     |
| C38-C42            | 1.403           | 1.403     |
| C37-C39            | 1.403           | 1.403     |
| N57-C34            | 1.436           | 1.437     |
| C34-C30            | 1.401           | 1.401     |
| C34-C32            | 1.398           | 1.398     |
| C30-C28            | 1.391           | 1.391     |
| C32-C29            | 1.391           | 1.391     |
| C28-C27            | 1.404           | 1.404     |
| C29-C27            | 1.403           | 1.403     |
| C27-C3             | 1.481           | 1.481     |
| C3-N6              | 1.342           | 1.342     |
| C3-N4              | 1.342           | 1.342     |
| N6-C1              | 1.340           | 1.339     |
| N4-C2              | 1.340           | 1.339     |
| C1-N5              | 1.341           | 1.341     |
| C2-N5              | 1.341           | 1.341     |
| C1-C17             | 1.484           | 1.485     |
| C2-C7              | 1.484           | 1.485     |
| Dihedral Angle (°) |                 |           |
| C38-N57-C34-C30    | 81.90           | 81.82     |
| C37-N57-C34-C32    | 98.07           | 98.16     |
| C28-C27-C3-N6      | 0.00            | 0.00      |
| C29-C27-C3-N4      | 0.00            | 0.00      |

| TZCN-SAF                  | Bond Length (Å) |           |
|---------------------------|-----------------|-----------|
|                           | Bond            | Gas Phase |
| C63-C62                   | 1.539           | 1.540     |
| C64-C62                   | 1.539           | 1.540     |
| C62-C44                   | 1.532           | 1.532     |
| C62-C46                   | 1.532           | 1.532     |
| C44-C42                   | 1.407           | 1.408     |
| C46-C43                   | 1.407           | 1.408     |
| C42-N41                   | 1.408           | 1.407     |
| C43-N41                   | 1.408           | 1.407     |
| C44-C48                   | 1.401           | 1.401     |
| C46-C51                   | 1.401           | 1.401     |
| C45-C42                   | 1.410           | 1.411     |
| C47-C43                   | 1.410           | 1.411     |
| N41-C14                   | 1.433           | 1.434     |
| C14-C10                   | 1.399           | 1.399     |
| C14-C12                   | 1.399           | 1.399     |
| C10-C8                    | 1.391           | 1.391     |
| C12-C9                    | 1.391           | 1.391     |
| C8-C7                     | 1.404           | 1.404     |
| C9-C7                     | 1.404           | 1.404     |
| C7-C2                     | 1.481           | 1.481     |
| C2-N5                     | 1.342           | 1.342     |
| C2-N4                     | 1.342           | 1.342     |
| N5-C1                     | 1.340           | 1.339     |
| N4-C3                     | 1.340           | 1.339     |
| C1-N6                     | 1.341           | 1.341     |
| C3-N6                     | 1.341           | 1.341     |
| C1-C17                    | 1.484           | 1.485     |
| C3-C27                    | 1.484           | 1.485     |
| <b>Dihedral Angle (°)</b> |                 |           |
| C42-N41-C14-C10           | 90.02           | 89.11     |
| C43-N41-C14-C12           | 89.99           | 89.07     |
| C8-C7-C2-N5               | -0.01           | -0.96     |
| C9-C7-C2-N4               | 0.00            | -0.96     |

| TZCN-DPA<br>Bond   | Bond Length (Å) |               |
|--------------------|-----------------|---------------|
|                    | Gas Phase       | Solvent Phase |
| C49-C47            | 1.396           | 1.396         |
| C60-C58            | 1.396           | 1.396         |
| C47-C44            | 1.393           | 1.394         |
| C58-C55            | 1.393           | 1.394         |
| C44-C42            | 1.402           | 1.402         |
| C55-C53            | 1.402           | 1.402         |
| C42-C43            | 1.402           | 1.402         |
| C53-C54            | 1.402           | 1.402         |
| C43-C45            | 1.393           | 1.394         |
| C54-C56            | 1.393           | 1.394         |
| C45-C49            | 1.396           | 1.396         |
| C56-C60            | 1.396           | 1.396         |
| C42-N41            | 1.428           | 1.429         |
| C53-N41            | 1.428           | 1.429         |
| N41-C14            | 1.404           | 1.402         |
| C14-C12            | 1.411           | 1.411         |
| C14-C10            | 1.411           | 1.411         |
| C12-C9             | 1.385           | 1.385         |
| C10-C8             | 1.385           | 1.385         |
| C9-C7              | 1.406           | 1.407         |
| C8-C7              | 1.406           | 1.407         |
| C7-C2              | 1.468           | 1.467         |
| C2-N4              | 1.347           | 1.347         |
| C2-N5              | 1.347           | 1.347         |
| N4-C3              | 1.336           | 1.336         |
| N5-C1              | 1.336           | 1.336         |
| C3-N6              | 1.342           | 1.342         |
| C1-N6              | 1.342           | 1.342         |
| C3-C27             | 1.486           | 1.487         |
| C1-C17             | 1.486           | 1.487         |
| Dihedral Angle (°) |                 |               |
| C42-N41-C14-C12    | -29.57          | -28.73        |
| C53-N41-C14-C10    | -29.57          | -28.73        |
| C9-C7-C2-N4        | 1.16            | 0.85          |
| C8-C7-C2-N5        | 1.16            | 0.85          |

| TZCN-DPAS          | Bond Length (Å) |               |
|--------------------|-----------------|---------------|
|                    | Gas Phase       | Solvent Phase |
| C45-C42            | 1.415           | 1.415         |
| N41-C14            | 1.440           | 1.441         |
| C14-C12            | 1.398           | 1.398         |
| C14-C10            | 1.398           | 1.398         |
| C12-C9             | 1.391           | 1.391         |
| C10-C8             | 1.391           | 1.391         |
| C9-C7              | 1.404           | 1.404         |
| C8-C7              | 1.404           | 1.404         |
| C7-C2              | 1.480           | 1.481         |
| C2-N4              | 1.342           | 1.342         |
| C2-N5              | 1.342           | 1.342         |
| N4-C3              | 1.339           | 1.339         |
| N5-C1              | 1.339           | 1.339         |
| C3-N6              | 1.341           | 1.341         |
| C1-N6              | 1.341           | 1.341         |
| C3-C27             | 1.484           | 1.485         |
| C1-C17             | 1.484           | 1.485         |
| Dihedral Angle (°) |                 |               |
| C43-N41-C14-C12    | 89.61           | 89.32         |
| C42-N41-C14-C10    | 89.64           | 89.34         |
| C9-C7-C2-N4        | -0.54           | -0.90         |
| C8-C7-C2-N5        | -0.54           | -0.90         |

| TZCN-ICbz          | Bond Length (Å) |               |
|--------------------|-----------------|---------------|
|                    | Gas Phase       | Solvent Phase |
| C59-C51            | 1.404           | 1.405         |
| C54-C48            | 1.408           | 1.409         |
| C51-C46            | 1.393           | 1.393         |
| C48-C44            | 1.420           | 1.420         |
| C46-C43            | 1.396           | 1.397         |
| C44-C42            | 1.402           | 1.402         |
| C43-C47            | 1.416           | 1.417         |
| C42-C45            | 1.414           | 1.414         |
| C47-C53            | 1.400           | 1.400         |
| C45-C50            | 1.408           | 1.409         |
| C53-C59            | 1.391           | 1.391         |
| C50-C54            | 1.385           | 1.385         |
| C45-C47            | 1.447           | 1.447         |
| C43-N41            | 1.406           | 1.405         |
| C42-N41            | 1.406           | 1.405         |
| C44-N49            | 1.387           | 1.387         |
| C48-C55            | 1.448           | 1.448         |
| N41-C14            | 1.410           | 1.413         |
| C14-C12            | 1.404           | 1.403         |
| C14-C10            | 1.405           | 1.405         |
| C12-C9             | 1.389           | 1.389         |
| C10-C8             | 1.390           | 1.390         |
| C9-C7              | 1.404           | 1.404         |
| C8-C7              | 1.404           | 1.404         |
| C7-C2              | 1.477           | 1.478         |
| C2-N4              | 1.343           | 1.343         |
| C2-N5              | 1.343           | 1.343         |
| N4-C3              | 1.339           | 1.339         |
| N5-C1              | 1.339           | 1.339         |
| C3-N6              | 1.341           | 1.341         |
| C1-N6              | 1.341           | 1.341         |
| C3-C27             | 1.484           | 1.485         |
| C1-C17             | 1.484           | 1.485         |
| Dihedral Angle (°) |                 |               |
| C43-N41-C14-C12    | -55.54          | -56.29        |
| C42-N41-C14-C10    | -47.89          | -49.33        |
| C9-C7-C2-N4        | 1.28            | 2.36          |
| C8-C7-C2-N5        | 1.45            | 2.53          |

| TZCN-DPAC          | Bond Length (Å) |               |
|--------------------|-----------------|---------------|
|                    | Gas Phase       | Solvent Phase |
| C46-C43            | 1.411           | 1.411         |
| C51-C46            | 1.398           | 1.399         |
| C43-C47            | 1.404           | 1.405         |
| C44-C42            | 1.410           | 1.411         |
| C48-C44            | 1.398           | 1.399         |
| C45-C42            | 1.404           | 1.405         |
| C62-C46            | 1.539           | 1.539         |
| C62-C44            | 1.538           | 1.539         |
| N41-C43            | 1.411           | 1.411         |
| N41-C42            | 1.411           | 1.411         |
| C62-C63            | 1.546           | 1.547         |
| C62-C74            | 1.563           | 1.563         |
| N41-C14            | 1.433           | 1.434         |
| C14-C12            | 1.401           | 1.401         |
| C14-C10            | 1.398           | 1.398         |
| C12-C9             | 1.391           | 1.391         |
| C10-C8             | 1.391           | 1.391         |
| C9-C7              | 1.404           | 1.404         |
| C8-C7              | 1.403           | 1.403         |
| C7-C2              | 1.480           | 1.481         |
| C2-N4              | 1.342           | 1.342         |
| C2-N5              | 1.342           | 1.342         |
| N4-C3              | 1.339           | 1.339         |
| N5-C1              | 1.339           | 1.339         |
| C3-N6              | 1.341           | 1.341         |
| C1-N6              | 1.341           | 1.341         |
| C3-C27             | 1.484           | 1.485         |
| C1-C17             | 1.484           | 1.485         |
| Dihedral Angle (°) |                 |               |
| C43-N41-C14-C12    | 82.51           | 82.92         |
| C42-N41-C14-C10    | 95.75           | 96.89         |
| C9-C7-C2-N4        | -0.38           | -0.04         |
| C8-C7-C2-N5        | -0.36           | -0.04         |

| TZCN-SSiAS         | Bond Length (Å) |               |
|--------------------|-----------------|---------------|
|                    | Gas Phase       | Solvent Phase |
| C46-C43            | 1.418           | 1.418         |
| C51-C46            | 1.408           | 1.408         |
| C47-C43            | 1.415           | 1.415         |
| C44-C42            | 1.418           | 1.418         |
| C48-C44            | 1.408           | 1.408         |
| C45-C42            | 1.415           | 1.415         |
| Si82-C46           | 1.855           | 1.855         |
| Si82-C44           | 1.855           | 1.855         |
| N41-C43            | 1.420           | 1.420         |
| N41-C42            | 1.420           | 1.420         |
| Si82-C63           | 1.885           | 1.885         |
| Si82-C62           | 1.885           | 1.885         |
| N41-C14            | 1.440           | 1.441         |
| C14-C12            | 1.398           | 1.398         |
| C14-C10            | 1.398           | 1.398         |
| C12-C9             | 1.391           | 1.391         |
| C10-C8             | 1.391           | 1.391         |
| C9-C7              | 1.404           | 1.404         |
| C8-C7              | 1.404           | 1.404         |
| C7-C2              | 1.481           | 1.481         |
| C2-N4              | 1.342           | 1.342         |
| C2-N5              | 1.342           | 1.342         |
| N4-C3              | 1.340           | 1.339         |
| N5-C1              | 1.340           | 1.339         |
| C3-N6              | 1.341           | 1.341         |
| C1-N6              | 1.341           | 1.341         |
| C3-C27             | 1.484           | 1.485         |
| C1-C17             | 1.484           | 1.485         |
| Dihedral Angle (°) |                 |               |
| C43-N41-C14-C12    | 90.00           | 89.65         |
| C42-N41-C14-C10    | 90.01           | 89.66         |
| C9-C7-C2-N4        | 0.00            | -0.64         |
| C8-C7-C2-N5        | 0.00            | -0.64         |

| TZCN-Cbz           | Bond Length (Å) |               |
|--------------------|-----------------|---------------|
|                    | Gas Phase       | Solvent Phase |
| C44-C42            | 1.397           | 1.397         |
| C43-C46            | 1.397           | 1.397         |
| C42-C45            | 1.416           | 1.417         |
| C43-C47            | 1.416           | 1.417         |
| C45-C50            | 1.399           | 1.399         |
| C47-C53            | 1.399           | 1.399         |
| C47-C45            | 1.448           | 1.448         |
| C42-N41            | 1.404           | 1.404         |
| C43-N41            | 1.404           | 1.404         |
| N41-C14            | 1.412           | 1.414         |
| C14-C10            | 1.403           | 1.403         |
| C14-C12            | 1.403           | 1.403         |
| C10-C8             | 1.388           | 1.389         |
| C12-C9             | 1.388           | 1.389         |
| C8-C7              | 1.404           | 1.404         |
| C9-C7              | 1.404           | 1.404         |
| C7-C2              | 1.476           | 1.477         |
| C2-N5              | 1.344           | 1.343         |
| C2-N4              | 1.344           | 1.343         |
| N5-C1              | 1.339           | 1.339         |
| N4-C3              | 1.339           | 1.339         |
| C1-N6              | 1.341           | 1.341         |
| C3-N6              | 1.341           | 1.341         |
| C1-C17             | 1.485           | 1.485         |
| C3-C27             | 1.485           | 1.485         |
| Dihedral Angle (°) |                 |               |
| C42-N41-C14-C10    | -49.72          | -50.26        |
| C43-N41-C14-C12    | -49.72          | -50.26        |
| C8-C7-C2-N5        | 1.12            | 1.49          |
| C9-C7-C2-N4        | 1.12            | 1.49          |

**Table S2.** Comparison of donor-acceptor dihedral angles (°) calculated at the B3LYP/6-31G(d) and B3LYP-D3(BJ)/6-31G(d) levels in toluene (PCM) for the studied molecules.

| <b>S. No.</b> | <b>Molecules</b> | <b>Bond</b>     | <b>B3LYP</b> | <b>D3(BJ)</b> |
|---------------|------------------|-----------------|--------------|---------------|
| 1.            | TZCN-PXZ         | C38-N57-C34-C30 | 80.38        | 71.52         |
|               |                  | C37-N57-C34-C32 | 80.44        | 71.58         |
| 2.            | TZCN-DMAC        | C42-N41-C14-C10 | 88.97        | 88.81         |
|               |                  | C43-N41-C14-C12 | 88.97        | 88.81         |
| 3.            | TZCN-TPA         | C43-C41-C14-C12 | -32.58       | -32.35        |
|               |                  | C42-C41-C14-C10 | -32.58       | -32.35        |
| 4.            | TZCN-PTZ         | C38-N57-C34-C30 | 81.82        | 80.18         |
|               |                  | C37-N57-C34-C32 | 98.16        | 99.83         |
| 5.            | TZCN-SAF         | C42-N41-C14-C10 | 89.11        | 83.44         |
|               |                  | C43-N41-C14-C12 | 89.08        | 96.57         |
| 6.            | TZCN-DPA         | C42-N41-C14-C12 | -28.74       | -28.72        |
|               |                  | C53-N41-C14-C10 | -28.74       | -28.72        |
| 7.            | TZCN-DPAS        | C43-N41-C14-C12 | 89.32        | 92.25         |
|               |                  | C42-N41-C14-C10 | 89.35        | 88.65         |
| 8.            | TZCN-ICbz        | C43-N41-C14-C12 | -56.30       | -54.85        |
|               |                  | C42-N41-C14-C10 | -49.34       | -46.55        |
| 9.            | TZCN-DPAC        | C43-N41-C14-C12 | 82.93        | 85.85         |
|               |                  | C42-N41-C14-C10 | 96.90        | 87.37         |
| 10.           | TZCN-SSiAS       | C43-N41-C14-C12 | 89.66        | 89.62         |
|               |                  | C42-N41-C14-C10 | 89.66        | 89.63         |
| 11.           | TZCN-Cbz         | C42-N41-C14-C10 | -50.26       | -48.49        |
|               |                  | C43-N41-C14-C12 | -50.26       | -48.49        |

**Table S3.** Calculated HOMO and LUMO energies and H-L gaps (eV) of the studied molecules in their ground ( $S_0$ ) state in the gas phase.

| S. No. | Molecules  | HOMO  | LUMO  | H-L Gap |
|--------|------------|-------|-------|---------|
| 1.     | TZCN-PXZ   | -4.90 | -2.84 | 2.06    |
| 2.     | TZCN-DMAC  | -5.10 | -2.83 | 2.26    |
| 3.     | TZCN-PTZ   | -5.18 | -2.86 | 2.32    |
| 4.     | TZCN-SAF   | -5.16 | -2.85 | 2.31    |
| 5.     | TZCN-DPAS  | -5.32 | -2.84 | 2.48    |
| 6.     | TZCN-ICbz  | -5.32 | -2.86 | 2.46    |
| 7.     | TZCN-DPAC  | -5.29 | -2.82 | 2.46    |
| 8.     | TZCN-SSiAS | -5.36 | -2.85 | 2.51    |

**Table S4.** Calculated singlet-triplet energy gaps ( $\Delta E_{ST}$ , eV) of the studied molecules in the gas phase and in toluene (PCM) at the M06-2X/6-31G(d) level of theory.

| S. No. | Molecules  | $\Delta E_{ST}$ (eV) |               |
|--------|------------|----------------------|---------------|
|        |            | Gas Phase            | Solvent Phase |
| 1.     | TZCN-PXZ   | 0.096                | 0.033         |
| 2.     | TZCN-DMAC  | 0.005                | 0.005         |
| 3.     | TZCN-TPA   | 0.545                | 0.493         |
| 4.     | TZCN-PTZ   | 0.016                | 0.023         |
| 5.     | TZCN-SAF   | 0.005                | 0.006         |
| 6.     | TZCN-DPA   | 0.730                | 0.646         |
| 7.     | TZCN-DPAS  | 0.005                | 0.006         |
| 8.     | TZCN-ICbz  | 0.300                | 0.280         |
| 9.     | TZCN-DPAC  | 0.009                | 0.008         |
| 10.    | TZCN-SSiAS | 0.005                | 0.005         |
| 11.    | TZCN-Cbz   | 0.481                | 0.447         |

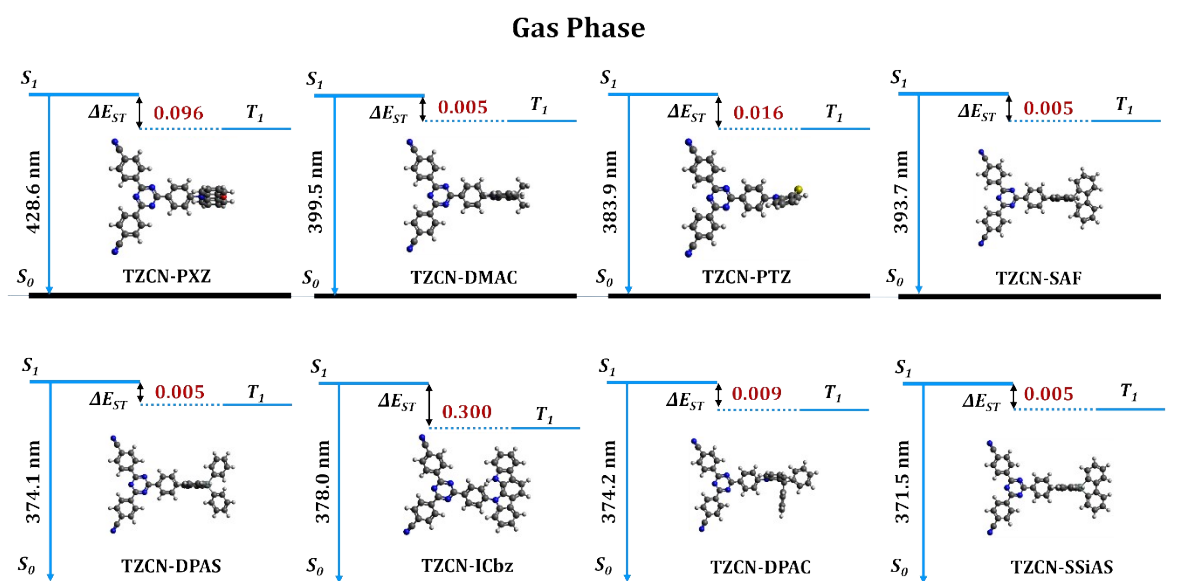

**Figure S2.** Calculated singlet-triplet energy gaps ( $\Delta E_{ST}$ , eV) of the studied molecules in the gas phase at the M06-2X/6-31G(d) level of theory.

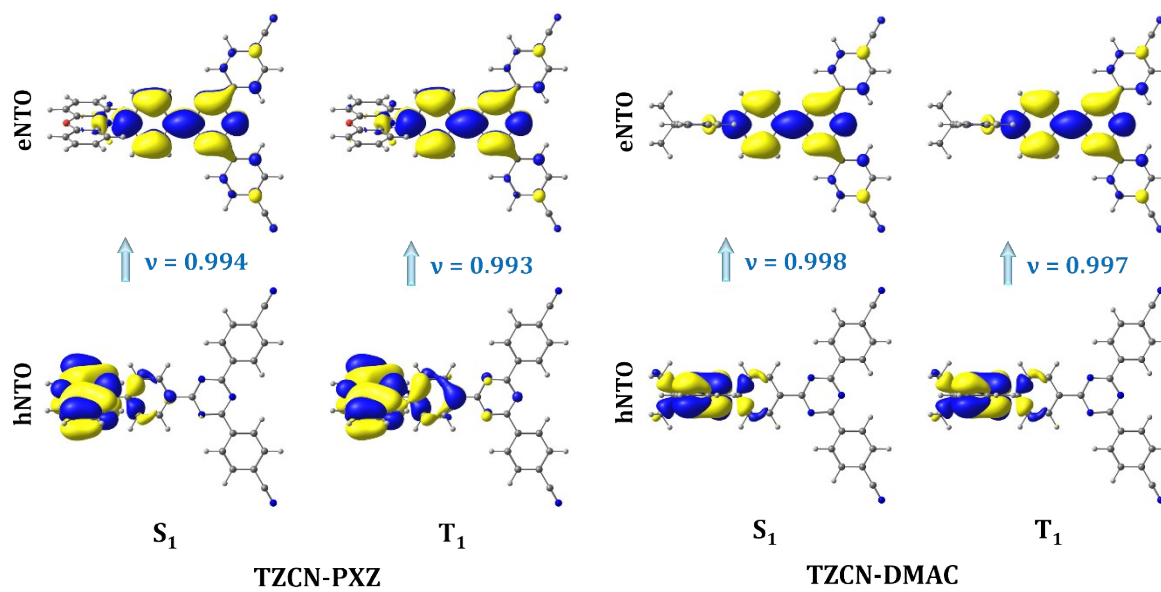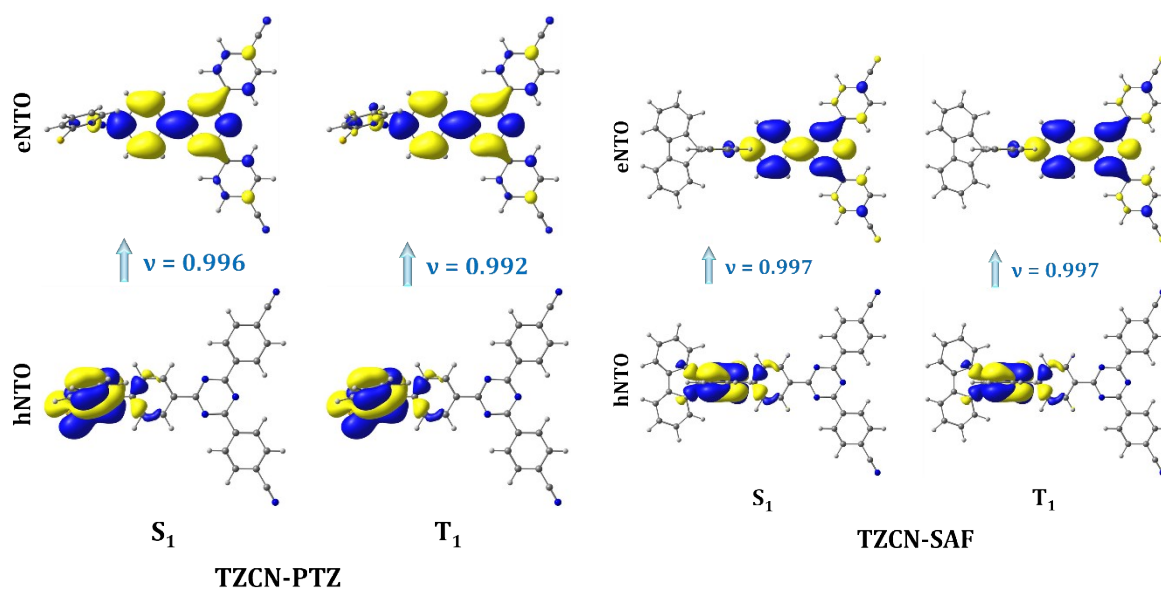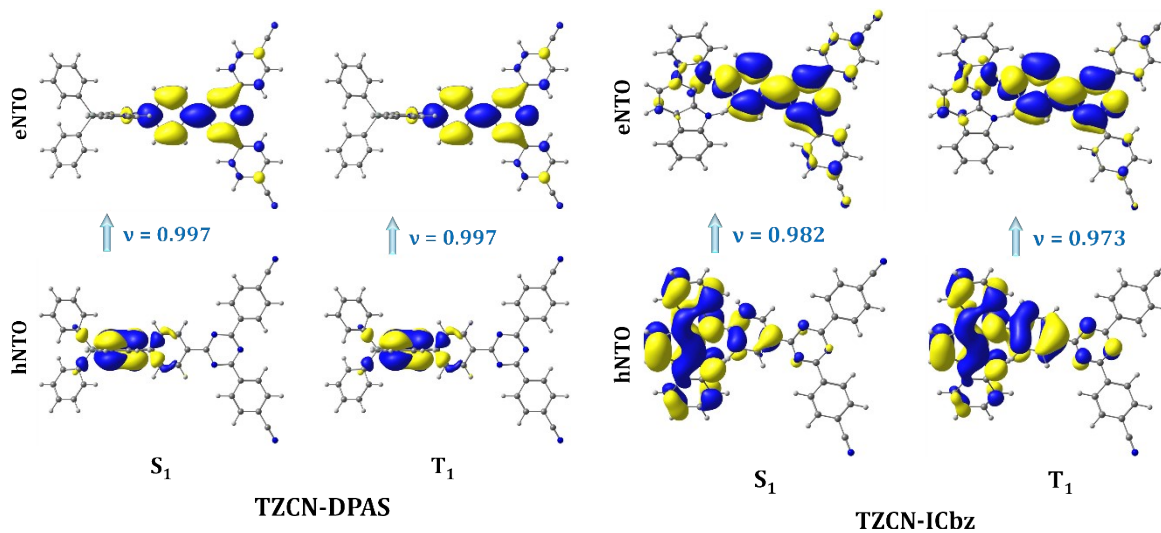

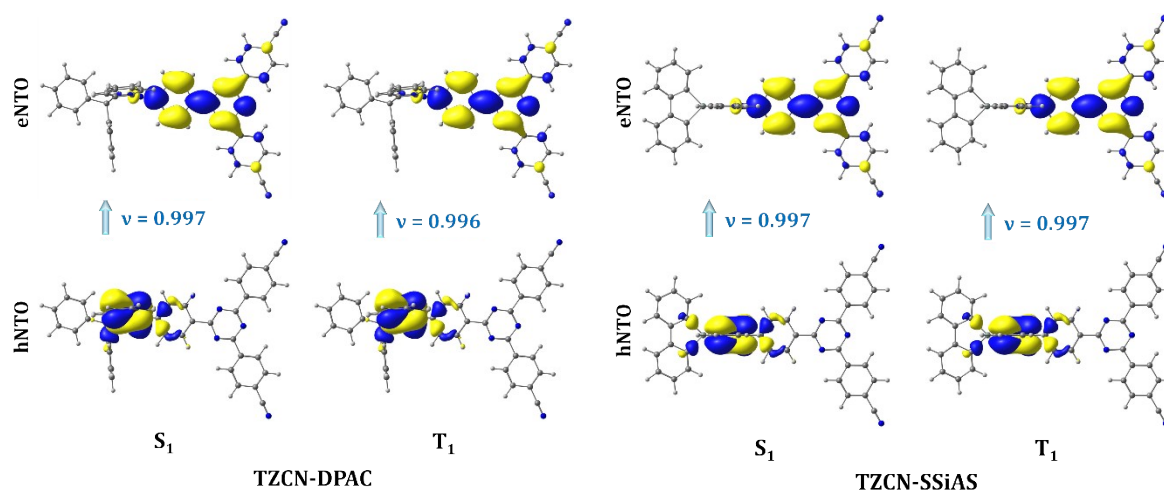

**Figure S3.** NTOs corresponding to the  $S_1$  and  $T_1$  states at their respective optimized geometries in the gas phase, calculated at the M06-2X/6-31G(d) level of theory. The hole (hNTO) and electron (eNTO) orbitals with the largest contribution ( $v$ ) are shown below and above the arrows, respectively (isosurface value = 0.02 a.u.).

**Table S5.** Calculated structural relaxation excited-state, RMSD, and Huang-Rhys (HR) factors of the studied molecules in the gas phase.

| S. No. | Molecules  | <sup>a</sup> Str.Relax (eV) | <sup>b</sup> RMSD (Å) | S Factor | Freq (cm <sup>-1</sup> ) |
|--------|------------|-----------------------------|-----------------------|----------|--------------------------|
| 1.     | TZCN-PXZ   | 0.1023                      | 0.0166                | 2.96     | 2434.24                  |
| 2.     | TZCN-DMAC  | 0.0001                      | 0.0001                | 0        | 0                        |
| 3.     | TZCN-PTZ   | 0.0003                      | 0.0002                | 0        | 0                        |
| 4.     | TZCN-SAF   | 0.0001                      | 0.0001                | 0        | 0                        |
| 5.     | TZCN-DPAS  | 0.0003                      | 0.2619                | 0        | 0                        |
| 6.     | TZCN-ICbz  | 0.0927                      | 0.1010                | 4.12     | 1116.45                  |
| 7.     | TZCN-DPAC  | 0.0004                      | 0.0022                | 0        | 0                        |
| 8.     | TZCN-SSiAS | 0.0002                      | 0.0001                | 0        | 0                        |

<sup>a</sup>Structural relaxation energy (calculated in S<sub>1</sub> and T<sub>1</sub> optimized geometry) and <sup>b</sup>Root mean square deviation (RMSD) between S<sub>1</sub> and T<sub>1</sub> optimized geometry.

**Table S6.** Calculated spin-orbit coupling matrix elements (SOCME) between the  $S_1$  and  $T_1$  states at the optimized  $T_1$  geometry using M06-2X/def2-TZVP level of theory in the gas phase.

| S. No. | Molecules  | $\Delta E_{ST}$<br>(eV) | SOCME ( $\text{cm}^{-1}$ )<br>( $S_1 \leftarrow T_1$ ) | S Factor | Freq<br>( $\text{cm}^{-1}$ ) | $k_{RISC}$ ( $\text{s}^{-1}$ )<br>( $S_1 \leftarrow T_1$ ) |
|--------|------------|-------------------------|--------------------------------------------------------|----------|------------------------------|------------------------------------------------------------|
| 1.     | TZCN-PXZ   | 0.096                   | 0.21                                                   | 2.96     | 2434.24                      | $1.86 \times 10^4$                                         |
| 2.     | TZCN-DMAC  | 0.005                   | 0                                                      | 0        | 0                            | -                                                          |
| 3.     | TZCN-PTZ   | 0.016                   | 0.15                                                   | 0        | 0                            | $1.34 \times 10^6$                                         |
| 4.     | TZCN-SAF   | 0.005                   | 0                                                      | 0        | 0                            | -                                                          |
| 5.     | TZCN-DPAS  | 0.005                   | 0.02                                                   | 0        | 0                            | $2.99 \times 10^4$                                         |
| 6.     | TZCN-ICbz  | 0.300                   | 0.26                                                   | 4.12     | 1116.45                      | 3.32                                                       |
| 7.     | TZCN-DPAC  | 0.009                   | 0.06                                                   | 0        | 0                            | $2.48 \times 10^5$                                         |
| 8.     | TZCN-SSiAS | 0.005                   | 0                                                      | 0        | 0                            | -                                                          |

**Table S7.** Calculated charge transfer (CT) and local excitation (LE) contributions (%) for the  $S_1$  and  $T_1$  states of the studied molecules in the gas phase.

| S. No. | Molecules  | $S_1$  |        | $T_1$  |        |
|--------|------------|--------|--------|--------|--------|
|        |            | CT (%) | LE (%) | CT (%) | LE (%) |
| 1.     | TZCN-PXZ   | 93.5   | 6.5    | 89.4   | 10.6   |
| 2.     | TZCN-DMAC  | 95.7   | 4.3    | 95.7   | 4.3    |
| 3.     | TZCN-PTZ   | 94.9   | 5.1    | 89.2   | 10.8   |
| 4.     | TZCN-SAF   | 95.7   | 4.3    | 95.6   | 4.4    |
| 5.     | TZCN-DPAS  | 95.9   | 4.1    | 30.9   | 69.1   |
| 6.     | TZCN-ICbz  | 88.0   | 12.0   | 76.6   | 23.4   |
| 7.     | TZCN-DPAC  | 95.9   | 4.2    | 68.0   | 32.0   |
| 8.     | TZCN-SSiAS | 95.8   | 4.2    | 16.9   | 83.4   |

**Table S8.** Calculated charge transfer (CT) and local excitation (LE) contributions (%) for the S<sub>1</sub> and T<sub>1</sub> states of the studied molecules in toluene (PCM).

| S. No. | Molecules  | S <sub>1</sub> |        | T <sub>1</sub> |        |
|--------|------------|----------------|--------|----------------|--------|
|        |            | CT (%)         | LE (%) | CT (%)         | LE (%) |
| 1.     | TZCN-PXZ   | 94.9           | 5.1    | 92.7           | 7.3    |
| 2.     | TZCN-DMAC  | 95.7           | 4.4    | 95.5           | 4.5    |
| 3.     | TZCN-PTZ   | 94.6           | 5.4    | 15.2           | 84.8   |
| 4.     | TZCN-SAF   | 95.6           | 4.4    | 95.0           | 5.0    |
| 5.     | TZCN-DPAS  | 95.7           | 4.3    | 17.6           | 82.4   |
| 6.     | TZCN-ICbz  | 86.7           | 13.3   | 74.6           | 25.4   |
| 7.     | TZCN-DPAC  | 95.5           | 4.5    | 15.7           | 84.3   |
| 8.     | TZCN-SSiAS | 95.7           | 4.3    | 17.1           | 82.9   |

**Table S9.** Comparison of optical absorption energy ( $S_1$ -state) in nm using toluene solvent.

| Molecules         | Gaussian/<br>6-31G(d) |               | ORCA/def2-TZVP |               |       |       |           |
|-------------------|-----------------------|---------------|----------------|---------------|-------|-------|-----------|
|                   | <b>M06-2X</b>         | <b>M06-2X</b> | B3LYP          | CAM-<br>B3LYP | PBE0  | WB97X | BHandHLYP |
| <b>TZCN-PXZ</b>   | <b>414.4</b>          | <b>409.6</b>  | 672.4          | 394.0         | 594.4 | 325.5 | 390.5     |
| <b>TZCN-DMAC</b>  | <b>386.4</b>          | <b>384.3</b>  | 601.3          | 370.4         | 538.1 | 308.5 | 368.7     |
| <b>TZCN-PTZ</b>   | <b>369.1</b>          | <b>369.9</b>  | 583.2          | 355.5         | 522.3 | 300.8 | 353.2     |
| <b>TZCN-SAF</b>   | <b>378.0</b>          | <b>374.9</b>  | 578.6          | 362.1         | 520.1 | 302.7 | 359.9     |
| <b>TZCN-DPAS</b>  | <b>360.8</b>          | <b>358.2</b>  | 539.8          | 347.4         | 487.0 | 292.6 | 345.5     |
| <b>TZCN-ICbz</b>  | <b>369.0</b>          | <b>366.7</b>  | 554.2          | 356.4         | 500.3 | 311.1 | 356.1     |
| <b>TZCN-DPAC</b>  | <b>362.6</b>          | <b>359.5</b>  | 545.9          | 347.9         | 492.2 | 293.2 | 345.6     |
| <b>TZCN-SSiAS</b> | <b>357.7</b>          | <b>355.2</b>  | 531.9          | 344.2         | 481.5 | 290.4 | 342.2     |

**Table S10.** Optimized Cartesian coordinates of  $S_0$  geometries in toluene (PCM).

All geometries were optimized at the B3LYP/6-31G(d) level of theory in toluene.

| <b>TZCN-PXZ (<math>S_0</math>, Toluene)</b> |                 |                 |                 |
|---------------------------------------------|-----------------|-----------------|-----------------|
| $E = -1749.51859297$ Hartree                |                 |                 |                 |
| C                                           | 3.188899000000  | 1.133300000000  | 0.061252000000  |
| C                                           | 3.189176000000  | -1.133173000000 | -0.060994000000 |
| C                                           | 1.219488000000  | -0.000176000000 | 0.000112000000  |
| N                                           | 1.850239000000  | -1.183677000000 | -0.062506000000 |
| N                                           | 3.903860000000  | 0.000151000000  | 0.000120000000  |
| N                                           | 1.849950000000  | 1.183480000000  | 0.062708000000  |
| C                                           | 3.931460000000  | -2.417473000000 | -0.131840000000 |
| C                                           | 5.335289000000  | -2.424977000000 | -0.142197000000 |
| C                                           | 3.235316000000  | -3.635284000000 | -0.189519000000 |
| C                                           | 6.033932000000  | -3.623726000000 | -0.208766000000 |
| H                                           | 5.868867000000  | -1.483146000000 | -0.097936000000 |
| C                                           | 3.924608000000  | -4.839406000000 | -0.255973000000 |
| H                                           | 2.151989000000  | -3.624968000000 | -0.181384000000 |
| C                                           | 5.330175000000  | -4.839074000000 | -0.265875000000 |
| H                                           | 7.118738000000  | -3.628288000000 | -0.217049000000 |
| H                                           | 3.385450000000  | -5.779733000000 | -0.300327000000 |
| C                                           | 3.930870000000  | 2.417787000000  | 0.131976000000  |
| C                                           | 3.234430000000  | 3.635431000000  | 0.189609000000  |
| C                                           | 5.334698000000  | 2.425637000000  | 0.142265000000  |
| C                                           | 3.923427000000  | 4.839726000000  | 0.255962000000  |
| H                                           | 2.151105000000  | 3.624849000000  | 0.181524000000  |
| C                                           | 6.033048000000  | 3.624562000000  | 0.208731000000  |
| H                                           | 5.868506000000  | 1.483935000000  | 0.098037000000  |
| C                                           | 5.328995000000  | 4.839740000000  | 0.265802000000  |
| H                                           | 3.384039000000  | 5.779923000000  | 0.300286000000  |
| H                                           | 7.117853000000  | 3.629391000000  | 0.216961000000  |
| C                                           | -0.262175000000 | -0.000351000000 | 0.000013000000  |
| C                                           | -0.973160000000 | 1.208310000000  | 0.073013000000  |
| C                                           | -0.972866000000 | -1.209176000000 | -0.073080000000 |
| C                                           | -2.364633000000 | 1.208046000000  | 0.076197000000  |
| H                                           | -0.425225000000 | 2.141344000000  | 0.133100000000  |
| C                                           | -2.364341000000 | -1.209238000000 | -0.076433000000 |
| H                                           | -0.424706000000 | -2.142084000000 | -0.133095000000 |
| C                                           | -3.067234000000 | -0.000682000000 | -0.000167000000 |
| H                                           | -2.916610000000 | 2.140757000000  | 0.138664000000  |
| H                                           | -2.916105000000 | -2.142069000000 | -0.138964000000 |
| C                                           | -5.209697000000 | -0.278598000000 | 1.185341000000  |
| C                                           | -5.209754000000 | 0.277794000000  | -1.185509000000 |
| C                                           | -4.578895000000 | -0.546302000000 | 2.405547000000  |
| C                                           | -6.617125000000 | -0.273517000000 | 1.155464000000  |
| C                                           | -6.617182000000 | 0.272502000000  | -1.155600000000 |
| C                                           | -4.579023000000 | 0.546574000000  | -2.405515000000 |

|                                           |                 |                 |                 |
|-------------------------------------------|-----------------|-----------------|-----------------|
| C                                         | -5.327694000000 | -0.813691000000 | 3.556467000000  |
| H                                         | -3.496141000000 | -0.544687000000 | 2.456742000000  |
| C                                         | -7.360928000000 | -0.538329000000 | 2.296498000000  |
| C                                         | -7.361050000000 | 0.538231000000  | -2.296380000000 |
| H                                         | -3.496271000000 | 0.545106000000  | -2.456752000000 |
| C                                         | -5.327887000000 | 0.814776000000  | -3.556202000000 |
| C                                         | -6.718215000000 | -0.813051000000 | 3.508071000000  |
| H                                         | -4.808985000000 | -1.019385000000 | 4.488226000000  |
| H                                         | -8.443571000000 | -0.522795000000 | 2.217602000000  |
| C                                         | -6.718407000000 | 0.813970000000  | -3.507758000000 |
| H                                         | -8.443688000000 | 0.522512000000  | -2.217462000000 |
| H                                         | -4.809230000000 | 1.021243000000  | -4.487819000000 |
| H                                         | -7.306242000000 | -1.019856000000 | 4.396886000000  |
| H                                         | -7.306485000000 | 1.021417000000  | -4.396390000000 |
| N                                         | -4.497495000000 | -0.000914000000 | -0.000222000000 |
| O                                         | -7.324222000000 | -0.001213000000 | -0.000217000000 |
| C                                         | 6.045221000000  | 6.080065000000  | 0.333995000000  |
| N                                         | 6.626413000000  | 7.086460000000  | 0.389256000000  |
| C                                         | 6.046700000000  | -6.079220000000 | -0.334172000000 |
| N                                         | 6.628131000000  | -7.085472000000 | -0.389516000000 |
| <b>TZCN-DMAC (S<sub>0</sub>, Toluene)</b> |                 |                 |                 |
| <i>E</i> = -1792.24608830 Hartree         |                 |                 |                 |
| C                                         | 3.620411000000  | -1.134615000000 | -0.016852000000 |
| C                                         | 1.650560000000  | -0.000004000000 | -0.000001000000 |
| C                                         | 3.620401000000  | 1.134625000000  | 0.016851000000  |
| N                                         | 2.281622000000  | 1.185057000000  | 0.018467000000  |
| N                                         | 2.281634000000  | -1.185059000000 | -0.018468000000 |
| N                                         | 4.335453000000  | 0.000008000000  | -0.000001000000 |
| C                                         | 0.169189000000  | -0.000011000000 | -0.000001000000 |
| C                                         | -0.541878000000 | -1.210115000000 | -0.044306000000 |
| C                                         | -0.541890000000 | 1.210086000000  | 0.044303000000  |
| C                                         | -1.933469000000 | -1.209559000000 | -0.045532000000 |
| H                                         | 0.006053000000  | -2.144479000000 | -0.078796000000 |
| C                                         | -1.933480000000 | 1.209518000000  | 0.045528000000  |
| H                                         | 0.006033000000  | 2.144455000000  | 0.078794000000  |
| C                                         | -2.636111000000 | -0.000024000000 | -0.000002000000 |
| H                                         | -2.486022000000 | -2.143367000000 | -0.081179000000 |
| H                                         | -2.486042000000 | 2.143320000000  | 0.081175000000  |
| C                                         | 4.362673000000  | -2.420892000000 | -0.034213000000 |
| C                                         | 5.766501000000  | -2.428838000000 | -0.041362000000 |
| C                                         | 3.666537000000  | -3.640022000000 | -0.042834000000 |
| C                                         | 6.465202000000  | -3.629302000000 | -0.056600000000 |
| H                                         | 6.299944000000  | -1.485905000000 | -0.034999000000 |

|   |                 |                 |                 |
|---|-----------------|-----------------|-----------------|
| C | 4.355871000000  | -4.845881000000 | -0.057832000000 |
| H | 2.583195000000  | -3.629251000000 | -0.037169000000 |
| C | 5.761466000000  | -4.845980000000 | -0.064721000000 |
| H | 7.550020000000  | -3.634191000000 | -0.062199000000 |
| H | 3.816734000000  | -5.787252000000 | -0.064080000000 |
| C | 4.362650000000  | 2.420909000000  | 0.034213000000  |
| C | 5.766478000000  | 2.428868000000  | 0.041361000000  |
| C | 3.666502000000  | 3.640033000000  | 0.042835000000  |
| C | 6.465168000000  | 3.629340000000  | 0.056600000000  |
| H | 6.299930000000  | 1.485941000000  | 0.034998000000  |
| C | 4.355825000000  | 4.845899000000  | 0.057834000000  |
| H | 2.583161000000  | 3.629251000000  | 0.037171000000  |
| C | 5.761421000000  | 4.846010000000  | 0.064723000000  |
| H | 7.549985000000  | 3.634238000000  | 0.062200000000  |
| H | 3.816679000000  | 5.787264000000  | 0.064083000000  |
| C | 6.478089000000  | -6.087848000000 | -0.079872000000 |
| C | 6.478031000000  | 6.087885000000  | 0.079875000000  |
| N | 7.059621000000  | 7.095505000000  | 0.092037000000  |
| N | 7.059688000000  | -7.095462000000 | -0.092033000000 |
| N | -4.070572000000 | -0.000030000000 | -0.000020000000 |
| C | -4.756571000000 | -0.068368000000 | 1.228195000000  |
| C | -4.756570000000 | 0.068311000000  | -1.228199000000 |
| C | -6.166749000000 | -0.071698000000 | 1.265302000000  |
| C | -4.029904000000 | -0.132886000000 | 2.434277000000  |
| C | -6.166749000000 | 0.071686000000  | -1.265304000000 |
| C | -4.029903000000 | 0.132795000000  | -2.434283000000 |
| C | -6.789364000000 | -0.142573000000 | 2.518783000000  |
| C | -4.681371000000 | -0.202399000000 | 3.660281000000  |
| H | -2.947164000000 | -0.128368000000 | 2.410216000000  |
| C | -6.789364000000 | 0.142576000000  | -2.518784000000 |
| C | -4.681371000000 | 0.202322000000  | -3.660286000000 |
| H | -2.947163000000 | 0.128242000000  | -2.410224000000 |
| C | -6.074395000000 | -0.208348000000 | 3.712120000000  |
| H | -7.874662000000 | -0.146324000000 | 2.562767000000  |
| H | -4.093005000000 | -0.251436000000 | 4.572661000000  |
| H | -7.874661000000 | 0.146371000000  | -2.562766000000 |
| C | -6.074394000000 | 0.208320000000  | -3.712123000000 |
| H | -4.093005000000 | 0.251333000000  | -4.572668000000 |
| H | -6.597775000000 | -0.262329000000 | 4.662153000000  |
| H | -6.597775000000 | 0.262314000000  | -4.662155000000 |
| C | -7.030943000000 | 0.000021000000  | 0.000003000000  |
| C | -7.929784000000 | 1.264655000000  | 0.072127000000  |
| H | -8.576213000000 | 1.339797000000  | -0.808394000000 |

|                                          |                 |                 |                 |
|------------------------------------------|-----------------|-----------------|-----------------|
| H                                        | -8.575217000000 | 1.239664000000  | 0.956240000000  |
| H                                        | -7.318224000000 | 2.171529000000  | 0.123269000000  |
| C                                        | -7.929872000000 | -1.264550000000 | -0.072113000000 |
| H                                        | -8.576301000000 | -1.339646000000 | 0.808410000000  |
| H                                        | -8.575314000000 | -1.239517000000 | -0.956218000000 |
| H                                        | -7.318375000000 | -2.171466000000 | -0.123260000000 |
| <b>TZCN-TPA (S<sub>0</sub>, Toluene)</b> |                 |                 |                 |
| <i>E</i> = -1906.56396488 Hartree        |                 |                 |                 |
| C                                        | -5.033196000000 | 1.133925000000  | -0.009792000000 |
| C                                        | -3.060498000000 | -0.000001000000 | 0.000005000000  |
| C                                        | -5.033197000000 | -1.133925000000 | 0.009801000000  |
| N                                        | -3.696208000000 | -1.185725000000 | 0.010569000000  |
| N                                        | -3.696208000000 | 1.185724000000  | -0.010559000000 |
| N                                        | -5.750614000000 | 0.000000000000  | 0.000004000000  |
| C                                        | -1.585777000000 | -0.000001000000 | 0.000005000000  |
| C                                        | -0.867148000000 | 1.207526000000  | -0.008674000000 |
| C                                        | -0.867149000000 | -1.207529000000 | 0.008682000000  |
| C                                        | 0.521203000000  | 1.205039000000  | -0.006520000000 |
| H                                        | -1.411299000000 | 2.145113000000  | -0.005711000000 |
| C                                        | 0.521202000000  | -1.205043000000 | 0.006527000000  |
| H                                        | -1.411301000000 | -2.145116000000 | 0.005720000000  |
| C                                        | 1.251362000000  | -0.000002000000 | 0.000003000000  |
| H                                        | 1.051617000000  | 2.152129000000  | 0.018129000000  |
| H                                        | 1.051616000000  | -2.152133000000 | -0.018123000000 |
| C                                        | -5.776005000000 | 2.421147000000  | -0.020963000000 |
| C                                        | -7.179706000000 | 2.429885000000  | -0.024296000000 |
| C                                        | -5.079829000000 | 3.640164000000  | -0.028409000000 |
| C                                        | -7.878260000000 | 3.630606000000  | -0.034782000000 |
| H                                        | -7.713041000000 | 1.486870000000  | -0.018756000000 |
| C                                        | -5.768721000000 | 4.846335000000  | -0.038818000000 |
| H                                        | -3.996462000000 | 3.628104000000  | -0.025886000000 |
| C                                        | -7.174388000000 | 4.847191000000  | -0.042052000000 |
| H                                        | -8.963136000000 | 3.635763000000  | -0.037444000000 |
| H                                        | -5.229264000000 | 5.787588000000  | -0.044456000000 |
| C                                        | -5.776007000000 | -2.421147000000 | 0.020967000000  |
| C                                        | -7.179708000000 | -2.429884000000 | 0.024296000000  |
| C                                        | -5.079831000000 | -3.640165000000 | 0.028411000000  |
| C                                        | -7.878263000000 | -3.630604000000 | 0.034777000000  |
| H                                        | -7.713042000000 | -1.486869000000 | 0.018758000000  |
| C                                        | -5.768724000000 | -4.846334000000 | 0.038816000000  |
| H                                        | -3.996465000000 | -3.628105000000 | 0.025892000000  |

|   |                 |                 |                 |
|---|-----------------|-----------------|-----------------|
| C | -7.174391000000 | -4.847190000000 | 0.042046000000  |
| H | -8.963138000000 | -3.635761000000 | 0.037436000000  |
| H | -5.229267000000 | -5.787588000000 | 0.044452000000  |
| C | -7.890471000000 | 6.089333000000  | -0.052793000000 |
| C | -7.890474000000 | -6.089332000000 | 0.052781000000  |
| N | -8.471493000000 | -7.097396000000 | 0.061473000000  |
| N | -8.471488000000 | 7.097397000000  | -0.061489000000 |
| C | 2.729937000000  | -0.000003000000 | 0.000002000000  |
| C | 3.463556000000  | 1.008302000000  | -0.651927000000 |
| C | 3.463556000000  | -1.008307000000 | 0.651931000000  |
| C | 4.852653000000  | 1.008492000000  | -0.662813000000 |
| H | 2.938737000000  | 1.785608000000  | -1.199929000000 |
| C | 4.852653000000  | -1.008497000000 | 0.662816000000  |
| H | 2.938738000000  | -1.785612000000 | 1.199935000000  |
| C | 5.575904000000  | -0.000003000000 | 0.000000000000  |
| H | 5.386493000000  | 1.786402000000  | -1.198309000000 |
| H | 5.386494000000  | -1.786406000000 | 1.198312000000  |
| N | 6.988325000000  | -0.000001000000 | 0.000001000000  |
| C | 7.709957000000  | -1.228384000000 | -0.037513000000 |
| C | 7.336042000000  | -2.249368000000 | -0.925505000000 |
| C | 8.812521000000  | -1.427435000000 | 0.807833000000  |
| C | 8.046421000000  | -3.448478000000 | -0.955290000000 |
| H | 6.490661000000  | -2.097174000000 | -1.589204000000 |
| C | 9.528099000000  | -2.622851000000 | 0.758544000000  |
| H | 9.103164000000  | -0.642771000000 | 1.499241000000  |
| C | 9.147927000000  | -3.641721000000 | -0.118112000000 |
| H | 7.744784000000  | -4.229013000000 | -1.648740000000 |
| H | 10.379525000000 | -2.761498000000 | 1.419528000000  |
| H | 9.703708000000  | -4.574445000000 | -0.149373000000 |
| C | 7.709952000000  | 1.228384000000  | 0.037512000000  |
| C | 7.336030000000  | 2.249368000000  | 0.925500000000  |
| C | 8.812516000000  | 1.427439000000  | -0.807834000000 |
| C | 8.046403000000  | 3.448482000000  | 0.955283000000  |
| H | 6.490649000000  | 2.097172000000  | 1.589198000000  |
| C | 9.528088000000  | 2.622858000000  | -0.758547000000 |
| H | 9.103163000000  | 0.642774000000  | -1.499240000000 |
| C | 9.147909000000  | 3.641729000000  | 0.118105000000  |
| H | 7.744761000000  | 4.229018000000  | 1.648731000000  |
| H | 10.379513000000 | 2.761508000000  | -1.419531000000 |
| H | 9.703686000000  | 4.574455000000  | 0.149365000000  |

**TZCN-PTZ** ( $S_0$ , Toluene)

$E = -2072.48935009$  Hartree

|   |                 |                 |                 |
|---|-----------------|-----------------|-----------------|
| C | -3.370941000000 | -1.104083000000 | 0.000168000000  |
| C | -3.367300000000 | 1.165574000000  | -0.000212000000 |
| C | -1.399598000000 | 0.027625000000  | 0.000079000000  |
| N | -2.028299000000 | 1.213736000000  | -0.000166000000 |
| N | -4.083920000000 | 0.031802000000  | -0.000054000000 |
| N | -2.032061000000 | -1.156686000000 | 0.000236000000  |
| C | -4.107519000000 | 2.452952000000  | -0.000528000000 |
| C | -5.511356000000 | 2.462916000000  | -0.000716000000 |
| C | -3.409551000000 | 3.671070000000  | -0.000646000000 |
| C | -6.208333000000 | 3.664473000000  | -0.001013000000 |
| H | -6.046201000000 | 1.520754000000  | -0.000632000000 |
| C | -4.097184000000 | 4.878022000000  | -0.000938000000 |
| H | -2.326212000000 | 3.658837000000  | -0.000502000000 |
| C | -5.502786000000 | 4.880125000000  | -0.001124000000 |
| H | -7.293140000000 | 3.670983000000  | -0.001160000000 |
| H | -3.556672000000 | 5.818605000000  | -0.001025000000 |
| C | -4.115451000000 | -2.389126000000 | 0.000386000000  |
| C | -3.421599000000 | -3.609576000000 | 0.000525000000  |
| C | -5.519295000000 | -2.394540000000 | 0.000457000000  |
| C | -4.113148000000 | -4.814260000000 | 0.000725000000  |
| H | -2.338231000000 | -3.600797000000 | 0.000472000000  |
| C | -6.220252000000 | -3.593823000000 | 0.000660000000  |
| H | -6.051018000000 | -1.450615000000 | 0.000355000000  |
| C | -5.518757000000 | -4.811796000000 | 0.000794000000  |
| H | -3.575807000000 | -5.756667000000 | 0.000829000000  |
| H | -7.305078000000 | -3.596726000000 | 0.000717000000  |
| C | 0.082120000000  | 0.025351000000  | 0.000082000000  |
| C | 0.790916000000  | -1.186853000000 | 0.000294000000  |
| C | 0.795620000000  | 1.234040000000  | -0.000132000000 |
| C | 2.182467000000  | -1.189299000000 | 0.000293000000  |
| H | 0.241509000000  | -2.120996000000 | 0.000462000000  |
| C | 2.187563000000  | 1.230941000000  | -0.000133000000 |
| H | 0.250054000000  | 2.170391000000  | -0.000299000000 |
| C | 2.889068000000  | 0.021237000000  | 0.000078000000  |
| H | 2.728746000000  | -2.127766000000 | 0.000464000000  |
| H | 2.743858000000  | 2.162897000000  | -0.000303000000 |
| C | 5.005577000000  | -0.106890000000 | 1.238298000000  |
| C | 5.005594000000  | -0.107663000000 | -1.238048000000 |
| C | 4.360117000000  | -0.618198000000 | 2.375303000000  |
| C | 6.360402000000  | 0.261211000000  | 1.355389000000  |
| C | 6.360429000000  | 0.260345000000  | -1.355332000000 |
| C | 4.360146000000  | -0.619634000000 | -2.374759000000 |
| C | 5.042816000000  | -0.757582000000 | 3.584474000000  |
| H | 3.315665000000  | -0.899793000000 | 2.321246000000  |
| C | 7.047867000000  | 0.079535000000  | 2.556390000000  |
| C | 7.047921000000  | 0.077913000000  | -2.556203000000 |
| H | 3.315681000000  | -0.901155000000 | -2.320562000000 |
| C | 5.042873000000  | -0.759775000000 | -3.583827000000 |

|                                          |                 |                 |                 |
|------------------------------------------|-----------------|-----------------|-----------------|
| C                                        | 6.391022000000  | -0.419597000000 | 3.681656000000  |
| H                                        | 4.510733000000  | -1.145404000000 | 4.448583000000  |
| H                                        | 8.097686000000  | 0.354203000000  | 2.608804000000  |
| C                                        | 6.391093000000  | -0.421894000000 | -3.681179000000 |
| H                                        | 8.097748000000  | 0.352525000000  | -2.608759000000 |
| H                                        | 4.510799000000  | -1.148101000000 | -4.447715000000 |
| H                                        | 6.928102000000  | -0.538346000000 | 4.617794000000  |
| H                                        | 6.928195000000  | -0.541236000000 | -4.617230000000 |
| N                                        | 4.326230000000  | 0.054709000000  | 0.000068000000  |
| C                                        | -6.237521000000 | -6.052532000000 | 0.001001000000  |
| N                                        | -6.820702000000 | -7.059300000000 | 0.001168000000  |
| C                                        | -6.217780000000 | 6.123047000000  | -0.001428000000 |
| N                                        | -6.798312000000 | 7.131345000000  | -0.001673000000 |
| S                                        | 7.178225000000  | 1.078351000000  | -0.000225000000 |
| <b>TZCN-SAF (S<sub>0</sub>, Toluene)</b> |                 |                 |                 |
| <i>E</i> = -2174.52771987 Hartree        |                 |                 |                 |
| C                                        | -5.251582000000 | 1.134936000000  | -0.003441000000 |
| C                                        | -3.282073000000 | -0.000119000000 | 0.000114000000  |
| C                                        | -5.251875000000 | -1.134667000000 | 0.003511000000  |
| N                                        | -3.912994000000 | -1.185238000000 | 0.004558000000  |
| N                                        | -3.912688000000 | 1.185162000000  | -0.004375000000 |
| N                                        | -5.966612000000 | 0.000226000000  | 0.000004000000  |
| C                                        | -1.800444000000 | -0.000310000000 | 0.000156000000  |
| C                                        | -1.089352000000 | 1.210249000000  | -0.024690000000 |
| C                                        | -1.089667000000 | -1.211058000000 | 0.025024000000  |
| C                                        | 0.302271000000  | 1.209577000000  | -0.025723000000 |
| H                                        | -1.637184000000 | 2.145087000000  | -0.044074000000 |
| C                                        | 0.301953000000  | -1.210750000000 | 0.026073000000  |
| H                                        | -1.637743000000 | -2.145753000000 | 0.044397000000  |
| C                                        | 1.004411000000  | -0.000675000000 | 0.000170000000  |
| H                                        | 0.854795000000  | 2.143860000000  | -0.046108000000 |
| H                                        | 0.854228000000  | -2.145182000000 | 0.046457000000  |
| C                                        | -5.993720000000 | 2.421317000000  | -0.005759000000 |
| C                                        | -7.397572000000 | 2.429346000000  | -0.008232000000 |
| C                                        | -5.297537000000 | 3.640455000000  | -0.004775000000 |
| C                                        | -8.096246000000 | 3.629918000000  | -0.009564000000 |
| H                                        | -7.931049000000 | 1.486413000000  | -0.009068000000 |
| C                                        | -5.986855000000 | 4.846411000000  | -0.005982000000 |
| H                                        | -4.214185000000 | 3.629652000000  | -0.002727000000 |
| C                                        | -7.392463000000 | 4.846591000000  | -0.008333000000 |
| H                                        | -9.181071000000 | 3.634887000000  | -0.011448000000 |
| H                                        | -5.447711000000 | 5.787795000000  | -0.004976000000 |
| C                                        | -5.994344000000 | -2.420857000000 | 0.005762000000  |
| C                                        | -7.398198000000 | -2.428528000000 | 0.008081000000  |
| C                                        | -5.298472000000 | -3.640173000000 | 0.004860000000  |
| C                                        | -8.097179000000 | -3.628922000000 | 0.009339000000  |
| H                                        | -7.931435000000 | -1.485460000000 | 0.008853000000  |

|   |                 |                 |                 |
|---|-----------------|-----------------|-----------------|
| C | -5.988098000000 | -4.845952000000 | 0.005994000000  |
| H | -4.215117000000 | -3.629647000000 | 0.002930000000  |
| C | -7.393707000000 | -4.845774000000 | 0.008188000000  |
| H | -9.182007000000 | -3.633615000000 | 0.011102000000  |
| H | -5.449195000000 | -5.787475000000 | 0.005050000000  |
| C | -8.109043000000 | 6.088580000000  | -0.009334000000 |
| C | -8.110599000000 | -6.087583000000 | 0.009112000000  |
| N | -8.692370000000 | -7.095164000000 | 0.009789000000  |
| N | -8.690562000000 | 7.096307000000  | -0.010076000000 |
| N | 2.439247000000  | -0.000823000000 | 0.000137000000  |
| C | 3.126547000000  | 0.044483000000  | 1.227919000000  |
| C | 3.126469000000  | -0.046949000000 | -1.227660000000 |
| C | 4.534376000000  | 0.046626000000  | 1.267908000000  |
| C | 2.405391000000  | 0.087212000000  | 2.439964000000  |
| C | 4.534296000000  | -0.049147000000 | -1.267744000000 |
| C | 2.405233000000  | -0.090458000000 | -2.439629000000 |
| C | 5.170237000000  | 0.093213000000  | 2.515725000000  |
| C | 3.064016000000  | 0.133147000000  | 3.662098000000  |
| H | 1.322499000000  | 0.084192000000  | 2.420584000000  |
| C | 5.170072000000  | -0.096637000000 | -2.515569000000 |
| C | 3.063775000000  | -0.137235000000 | -3.661776000000 |
| H | 1.322342000000  | -0.087403000000 | -2.420182000000 |
| C | 4.459516000000  | 0.136912000000  | 3.709834000000  |
| H | 6.256276000000  | 0.094782000000  | 2.540216000000  |
| H | 2.480385000000  | 0.165681000000  | 4.578220000000  |
| H | 6.256110000000  | -0.098239000000 | -2.540132000000 |
| C | 4.459272000000  | -0.141124000000 | -3.709600000000 |
| H | 2.480081000000  | -0.170360000000 | -4.577836000000 |
| H | 4.984837000000  | 0.172599000000  | 4.659512000000  |
| H | 4.984529000000  | -0.177473000000 | -4.659289000000 |
| C | 5.394405000000  | -0.000484000000 | 0.000012000000  |
| C | 6.376941000000  | 1.184595000000  | -0.044939000000 |
| C | 6.379245000000  | -1.183616000000 | 0.044790000000  |
| C | 6.087044000000  | 2.542822000000  | -0.096244000000 |
| C | 7.711178000000  | 0.736463000000  | -0.028366000000 |
| C | 6.091978000000  | -2.542399000000 | 0.096194000000  |
| C | 7.712607000000  | -0.732905000000 | 0.027932000000  |
| C | 7.143180000000  | 3.460159000000  | -0.131649000000 |
| H | 5.056852000000  | 2.889401000000  | -0.108923000000 |
| C | 8.765454000000  | 1.652705000000  | -0.064224000000 |
| C | 7.149888000000  | -3.457695000000 | 0.131399000000  |
| H | 5.062453000000  | -2.890946000000 | 0.109103000000  |
| C | 8.768660000000  | -1.647113000000 | 0.063585000000  |
| C | 8.471120000000  | 3.017249000000  | -0.115844000000 |
| H | 6.930703000000  | 4.525094000000  | -0.171868000000 |
| H | 9.798438000000  | 1.314391000000  | -0.052592000000 |
| C | 8.476969000000  | -3.012219000000 | 0.115298000000  |
| H | 6.939477000000  | -4.523037000000 | 0.171694000000  |
| H | 9.800989000000  | -1.306811000000 | 0.051733000000  |

|                                          |                |                |                |
|------------------------------------------|----------------|----------------|----------------|
| H                                        | 9.28071000000  | 3.74163900000  | -0.14407000000 |
| H                                        | 9.28796100000  | -3.73504500000 | 0.14337000000  |
| <b>TZCN-DPA (S<sub>0</sub>, Toluene)</b> |                |                |                |
| <i>E</i> = -1675.50739954 Hartree        |                |                |                |
| C                                        | -3.02455100000 | 1.12927500000  | 0.09817800000  |
| C                                        | -1.04972200000 | 0.00000300000  | -0.00000200000 |
| C                                        | -3.02454900000 | -1.12926600000 | -0.09825600000 |
| N                                        | -1.68907400000 | -1.18239200000 | -0.10083300000 |
| N                                        | -1.68907600000 | 1.18240000000  | 0.10079900000  |
| N                                        | -3.74391100000 | 0.00000400000  | -0.00003800000 |
| C                                        | 0.41784900000  | 0.00000400000  | -0.00000300000 |
| C                                        | 1.14274600000  | 1.20001200000  | 0.12039100000  |
| C                                        | 1.14274700000  | -1.20000300000 | -0.12039600000 |
| C                                        | 2.52802900000  | 1.20498000000  | 0.12349000000  |
| H                                        | 0.60125900000  | 2.13319200000  | 0.22697600000  |
| C                                        | 2.52803100000  | -1.20497000000 | -0.12349400000 |
| H                                        | 0.60126100000  | -2.13318400000 | -0.22697900000 |
| C                                        | 3.25331800000  | 0.00000500000  | -0.00000300000 |
| H                                        | 3.06174900000  | 2.14230500000  | 0.23293600000  |
| H                                        | 3.06175200000  | -2.14229500000 | -0.23293500000 |
| C                                        | -3.76786600000 | 2.41218000000  | 0.21131700000  |
| C                                        | -5.17147000000 | 2.42091400000  | 0.21862600000  |
| C                                        | -3.07182200000 | 3.62707500000  | 0.31208800000  |
| C                                        | -5.86992900000 | 3.61720200000  | 0.32417800000  |
| H                                        | -5.70479000000 | 1.48109000000  | 0.14088400000  |
| C                                        | -3.76032600000 | 4.82882800000  | 0.41795100000  |
| H                                        | -1.98846400000 | 3.61479000000  | 0.30599400000  |
| C                                        | -5.16603300000 | 4.82963600000  | 0.42444200000  |
| H                                        | -6.95484700000 | 3.62206100000  | 0.32976100000  |
| H                                        | -3.22059200000 | 5.76676900000  | 0.49567400000  |
| C                                        | -3.76786300000 | -2.41217500000 | -0.21135800000 |
| C                                        | -5.17146700000 | -2.42091100000 | -0.21866700000 |
| C                                        | -3.07181600000 | -3.62707200000 | -0.31209300000 |
| C                                        | -5.86992300000 | -3.61720300000 | -0.32418800000 |
| H                                        | -5.70478800000 | -1.48108600000 | -0.14095100000 |
| C                                        | -3.76031900000 | -4.82882900000 | -0.41792500000 |
| H                                        | -1.98845800000 | -3.61478500000 | -0.30599900000 |
| C                                        | -5.16602600000 | -4.82963900000 | -0.42441800000 |
| H                                        | -6.95484200000 | -3.62206400000 | -0.32977300000 |
| H                                        | -3.22058300000 | -5.76677100000 | -0.49562200000 |
| C                                        | -5.88169900000 | 6.06721800000  | 0.53319100000  |
| C                                        | -5.88169000000 | -6.06722400000 | -0.53313500000 |
| N                                        | -6.46230700000 | -7.07174700000 | -0.62132000000 |
| N                                        | -6.46231800000 | 7.07173700000  | 0.62140200000  |
| N                                        | 4.65593200000  | 0.00000300000  | 0.00000100000  |
| C                                        | 5.38963700000  | -1.12995300000 | 0.47699000000  |
| C                                        | 6.44990000000  | -1.64915700000 | -0.27951700000 |

|   |                |                 |                 |
|---|----------------|-----------------|-----------------|
| C | 5.073541000000 | -1.714900000000 | 1.712208000000  |
| C | 7.182492000000 | -2.735931000000 | 0.196302000000  |
| H | 6.694880000000 | -1.197446000000 | -1.235707000000 |
| C | 5.800418000000 | -2.811927000000 | 2.172804000000  |
| H | 4.261309000000 | -1.306431000000 | 2.305488000000  |
| C | 6.859572000000 | -3.325662000000 | 1.420603000000  |
| H | 8.001786000000 | -3.129030000000 | -0.399435000000 |
| H | 5.545847000000 | -3.256083000000 | 3.131257000000  |
| H | 7.428608000000 | -4.175646000000 | 1.785981000000  |
| C | 5.389649000000 | 1.129955000000  | -0.476982000000 |
| C | 6.449907000000 | 1.649153000000  | 0.279535000000  |
| C | 5.073574000000 | 1.714898000000  | -1.712208000000 |
| C | 7.182514000000 | 2.735919000000  | -0.196280000000 |
| H | 6.694873000000 | 1.197444000000  | 1.235729000000  |
| C | 5.800466000000 | 2.811917000000  | -2.172800000000 |
| H | 4.261348000000 | 1.306432000000  | -2.305497000000 |
| C | 6.859614000000 | 3.325648000000  | -1.420587000000 |
| H | 8.001804000000 | 3.129015000000  | 0.399466000000  |
| H | 5.545911000000 | 3.256070000000  | -3.131259000000 |
| H | 7.428661000000 | 4.175626000000  | -1.785962000000 |

**TZCN-DPAS (S<sub>0</sub>, Toluene)**

*E* = -2427.13040071 Hartree

|   |                 |                 |                 |
|---|-----------------|-----------------|-----------------|
| C | -5.411334000000 | 1.135015000000  | -0.009049000000 |
| C | -3.442074000000 | -0.000627000000 | -0.000099000000 |
| C | -5.412373000000 | -1.134466000000 | 0.008956000000  |
| N | -4.073591000000 | -1.185534000000 | 0.009975000000  |
| N | -4.072507000000 | 1.184858000000  | -0.010145000000 |
| N | -6.126846000000 | 0.000601000000  | -0.000029000000 |
| C | -1.960823000000 | -0.001304000000 | -0.000120000000 |
| C | -1.248843000000 | 1.208845000000  | -0.029525000000 |
| C | -1.249950000000 | -1.212113000000 | 0.029280000000  |
| C | 0.142703000000  | 1.207663000000  | -0.030244000000 |
| H | -1.796105000000 | 2.143949000000  | -0.052562000000 |
| C | 0.141590000000  | -1.212207000000 | 0.030040000000  |
| H | -1.798068000000 | -2.146716000000 | 0.052301000000  |
| C | 0.843386000000  | -0.002583000000 | -0.000073000000 |
| H | 0.695893000000  | 2.141468000000  | -0.054255000000 |
| H | 0.693919000000  | -2.146522000000 | 0.054066000000  |
| C | -6.153050000000 | 2.421665000000  | -0.017833000000 |
| C | -7.556896000000 | 2.430194000000  | -0.020906000000 |
| C | -5.456436000000 | 3.640550000000  | -0.022497000000 |
| C | -8.255143000000 | 3.630992000000  | -0.028283000000 |
| H | -8.090696000000 | 1.487449000000  | -0.017475000000 |
| C | -6.145314000000 | 4.846738000000  | -0.029771000000 |
| H | -4.373087000000 | 3.629353000000  | -0.020058000000 |
| C | -7.550927000000 | 4.847412000000  | -0.032622000000 |
| H | -9.339967000000 | 3.636339000000  | -0.030645000000 |

|    |                 |                 |                 |
|----|-----------------|-----------------|-----------------|
| H  | -5.605816000000 | 5.787916000000  | -0.033147000000 |
| C  | -6.155266000000 | -2.420437000000 | 0.017773000000  |
| C  | -7.559119000000 | -2.427690000000 | 0.020910000000  |
| C  | -5.459760000000 | -3.639955000000 | 0.022414000000  |
| C  | -8.258458000000 | -3.627853000000 | 0.028328000000  |
| H  | -8.092064000000 | -1.484461000000 | 0.017497000000  |
| C  | -6.149734000000 | -4.845515000000 | 0.029729000000  |
| H  | -4.376401000000 | -3.629739000000 | 0.019927000000  |
| C  | -7.555346000000 | -4.844912000000 | 0.032645000000  |
| H  | -9.343289000000 | -3.632215000000 | 0.030741000000  |
| H  | -5.611094000000 | -5.787183000000 | 0.033088000000  |
| C  | -8.267087000000 | 6.089615000000  | -0.039803000000 |
| C  | -8.272622000000 | -6.086471000000 | 0.039869000000  |
| N  | -8.854750000000 | -7.093835000000 | 0.045602000000  |
| N  | -8.848316000000 | 7.097498000000  | -0.045499000000 |
| N  | 2.284920000000  | -0.003139000000 | 0.000001000000  |
| C  | 2.916734000000  | 0.042826000000  | 1.271295000000  |
| C  | 2.916824000000  | -0.050146000000 | -1.271206000000 |
| C  | 4.324671000000  | 0.060320000000  | 1.442655000000  |
| C  | 2.100442000000  | 0.072463000000  | 2.427805000000  |
| C  | 4.324786000000  | -0.066110000000 | -1.442526000000 |
| C  | 2.100571000000  | -0.082419000000 | -2.427667000000 |
| C  | 4.844095000000  | 0.102651000000  | 2.751145000000  |
| Si | 5.501918000000  | -0.000248000000 | -0.000002000000 |
| C  | 2.652799000000  | 0.117181000000  | 3.701402000000  |
| H  | 1.022771000000  | 0.059448000000  | 2.337945000000  |
| C  | 4.844252000000  | -0.110214000000 | -2.750943000000 |
| C  | 2.652977000000  | -0.128579000000 | -3.701190000000 |
| H  | 1.022884000000  | -0.070474000000 | -2.337819000000 |
| C  | 4.037161000000  | 0.132821000000  | 3.881451000000  |
| H  | 5.924872000000  | 0.110838000000  | 2.878936000000  |
| H  | 1.986750000000  | 0.138147000000  | 4.560232000000  |
| H  | 5.925034000000  | -0.117536000000 | -2.878732000000 |
| C  | 4.037356000000  | -0.143173000000 | -3.881201000000 |
| H  | 1.986955000000  | -0.151630000000 | -4.559987000000 |
| H  | 4.471540000000  | 0.165688000000  | 4.876237000000  |
| H  | 4.471776000000  | -0.177295000000 | -4.875926000000 |
| C  | 6.600230000000  | 1.541641000000  | -0.044793000000 |
| C  | 7.814420000000  | 1.562967000000  | -0.757956000000 |
| C  | 6.191545000000  | 2.734752000000  | 0.580166000000  |
| C  | 8.584702000000  | 2.724170000000  | -0.846967000000 |
| H  | 8.172626000000  | 0.658173000000  | -1.243716000000 |
| C  | 6.958794000000  | 3.898312000000  | 0.497711000000  |
| H  | 5.262865000000  | 2.753983000000  | 1.145441000000  |
| C  | 8.157713000000  | 3.895534000000  | -0.218089000000 |
| H  | 9.518809000000  | 2.713462000000  | -1.403079000000 |
| H  | 6.622187000000  | 4.805660000000  | 0.993072000000  |
| H  | 8.757144000000  | 4.800000000000  | -0.283349000000 |
| C  | 6.607266000000  | -1.537056000000 | 0.044707000000  |

|   |                |                 |                 |
|---|----------------|-----------------|-----------------|
| C | 7.822270000000 | -1.552377000000 | 0.756631000000  |
| C | 6.203309000000 | -2.732473000000 | -0.578936000000 |
| C | 8.597866000000 | -2.710039000000 | 0.845717000000  |
| H | 8.176880000000 | -0.645606000000 | 1.241332000000  |
| C | 6.975885000000 | -3.892491000000 | -0.496420000000 |
| H | 5.274140000000 | -2.756324000000 | -1.143230000000 |
| C | 8.175520000000 | -3.883775000000 | 0.218142000000  |
| H | 9.532483000000 | -2.694708000000 | 1.400863000000  |
| H | 6.642859000000 | -4.801717000000 | -0.990757000000 |
| H | 8.779087000000 | -4.785482000000 | 0.283453000000  |

**TZCN-ICbz (S<sub>0</sub>, Toluene)**

*E* = -1959.54842648 Hartree

|   |                 |                 |                 |
|---|-----------------|-----------------|-----------------|
| C | 3.653705000000  | 1.119423000000  | -0.516551000000 |
| C | 1.909306000000  | -0.318698000000 | -0.276492000000 |
| C | 4.019558000000  | -0.989826000000 | 0.238138000000  |
| N | 2.718155000000  | -1.297665000000 | 0.161621000000  |
| N | 2.335736000000  | 0.906494000000  | -0.625869000000 |
| N | 4.536368000000  | 0.203916000000  | -0.089534000000 |
| C | 0.463036000000  | -0.606727000000 | -0.379467000000 |
| C | -0.424392000000 | 0.359988000000  | -0.880337000000 |
| C | -0.048705000000 | -1.852917000000 | 0.019137000000  |
| C | -1.784099000000 | 0.088650000000  | -0.986924000000 |
| H | -0.033675000000 | 1.317060000000  | -1.206158000000 |
| C | -1.408805000000 | -2.123366000000 | -0.066838000000 |
| H | 0.630013000000  | -2.599357000000 | 0.415040000000  |
| C | -2.290556000000 | -1.154200000000 | -0.570687000000 |
| H | -2.457663000000 | 0.825301000000  | -1.412969000000 |
| H | -1.800136000000 | -3.075937000000 | 0.274433000000  |
| C | 4.173201000000  | 2.459477000000  | -0.891107000000 |
| C | 5.544956000000  | 2.740796000000  | -0.790881000000 |
| C | 3.296957000000  | 3.456774000000  | -1.347824000000 |
| C | 6.035737000000  | 3.992867000000  | -1.138763000000 |
| H | 6.217981000000  | 1.968580000000  | -0.438054000000 |
| C | 3.777713000000  | 4.711916000000  | -1.698446000000 |
| H | 2.239061000000  | 3.235649000000  | -1.423735000000 |
| C | 5.152392000000  | 4.986377000000  | -1.595084000000 |
| H | 7.095964000000  | 4.208958000000  | -1.060588000000 |
| H | 3.099498000000  | 5.481512000000  | -2.051471000000 |
| C | 4.953561000000  | -2.041029000000 | 0.716089000000  |
| C | 6.328238000000  | -1.774889000000 | 0.817505000000  |
| C | 4.469626000000  | -3.310634000000 | 1.069489000000  |
| C | 7.205696000000  | -2.755250000000 | 1.263114000000  |
| H | 6.697963000000  | -0.794127000000 | 0.543312000000  |
| C | 5.338716000000  | -4.297765000000 | 1.516273000000  |
| H | 3.408168000000  | -3.512045000000 | 0.988843000000  |
| C | 6.713818000000  | -4.023938000000 | 1.615348000000  |
| H | 8.267847000000  | -2.548537000000 | 1.340742000000  |

|                                           |                 |                 |                 |
|-------------------------------------------|-----------------|-----------------|-----------------|
| H                                         | 4.963390000000  | -5.278476000000 | 1.788856000000  |
| C                                         | 5.653804000000  | 6.280604000000  | -1.955088000000 |
| C                                         | 7.615304000000  | -5.039466000000 | 2.075739000000  |
| N                                         | 8.346723000000  | -5.863570000000 | 2.449308000000  |
| N                                         | 6.060614000000  | 7.330852000000  | -2.246891000000 |
| N                                         | -3.672568000000 | -1.434191000000 | -0.671725000000 |
| C                                         | -4.727720000000 | -0.619091000000 | -0.227896000000 |
| C                                         | -4.226403000000 | -2.516442000000 | -1.376127000000 |
| C                                         | -4.740409000000 | 0.532642000000  | 0.573129000000  |
| C                                         | -5.958579000000 | -1.179662000000 | -0.643347000000 |
| C                                         | -3.586915000000 | -3.563737000000 | -2.044437000000 |
| C                                         | -5.637434000000 | -2.385965000000 | -1.376127000000 |
| C                                         | -5.985551000000 | 1.132634000000  | 0.902176000000  |
| N                                         | -3.722285000000 | 1.262365000000  | 1.169246000000  |
| C                                         | -7.188863000000 | -0.579530000000 | -0.306160000000 |
| C                                         | -4.386691000000 | -4.504049000000 | -2.692002000000 |
| H                                         | -2.505607000000 | -3.645481000000 | -2.068197000000 |
| C                                         | -6.418464000000 | -3.345053000000 | -2.033624000000 |
| C                                         | -7.201452000000 | 0.576651000000  | 0.456396000000  |
| C                                         | -5.679808000000 | 2.282388000000  | 1.728165000000  |
| C                                         | -4.267691000000 | 2.324696000000  | 1.871899000000  |
| H                                         | -2.738509000000 | 1.052197000000  | 1.106456000000  |
| H                                         | -8.119625000000 | -1.029403000000 | -0.639080000000 |
| C                                         | -5.788561000000 | -4.402165000000 | -2.684024000000 |
| H                                         | -3.912237000000 | -5.329742000000 | -3.214981000000 |
| H                                         | -7.501795000000 | -3.259688000000 | -2.040682000000 |
| H                                         | -8.142974000000 | 1.047565000000  | 0.724213000000  |
| C                                         | -6.460360000000 | 3.263627000000  | 2.354874000000  |
| C                                         | -3.628851000000 | 3.316838000000  | 2.620277000000  |
| H                                         | -6.383799000000 | -5.152728000000 | -3.196110000000 |
| C                                         | -5.830462000000 | 4.255253000000  | 3.101498000000  |
| H                                         | -7.542964000000 | 3.250586000000  | 2.259084000000  |
| C                                         | -4.429056000000 | 4.279337000000  | 3.231409000000  |
| H                                         | -2.547356000000 | 3.337186000000  | 2.722573000000  |
| H                                         | -6.425517000000 | 5.020869000000  | 3.591174000000  |
| H                                         | -3.960224000000 | 5.063425000000  | 3.819679000000  |
| <b>TZCN-DPAC (S<sub>0</sub>, Toluene)</b> |                 |                 |                 |
| <i>E</i> = -2175.71101375 Hartree         |                 |                 |                 |
| C                                         | -4.981649000000 | -1.174286000000 | -0.000046000000 |
| C                                         | -3.117980000000 | 0.127532000000  | -0.000187000000 |
| C                                         | -5.179070000000 | 1.086620000000  | -0.000094000000 |
| N                                         | -3.849755000000 | 1.253410000000  | -0.000206000000 |
| N                                         | -3.643603000000 | -1.107960000000 | -0.000077000000 |
| N                                         | -5.792736000000 | -0.105990000000 | -0.000035000000 |
| C                                         | -1.642207000000 | 0.256129000000  | -0.000315000000 |
| C                                         | -0.828469000000 | -0.887767000000 | 0.000592000000  |
| C                                         | -1.039474000000 | 1.524665000000  | -0.001382000000 |

|   |                 |                 |                 |
|---|-----------------|-----------------|-----------------|
| C | 0.558072000000  | -0.766145000000 | 0.000513000000  |
| H | -1.292612000000 | -1.867066000000 | 0.001417000000  |
| C | 0.346672000000  | 1.645843000000  | -0.001568000000 |
| H | -1.666980000000 | 2.408245000000  | -0.002155000000 |
| C | 1.152641000000  | 0.499711000000  | -0.000552000000 |
| H | 1.192810000000  | -1.646620000000 | 0.001255000000  |
| H | 0.812916000000  | 2.626414000000  | -0.002512000000 |
| C | -5.608702000000 | -2.520571000000 | -0.000039000000 |
| C | -7.006446000000 | -2.651673000000 | -0.000016000000 |
| C | -4.808211000000 | -3.673921000000 | -0.000088000000 |
| C | -7.597056000000 | -3.908941000000 | -0.000051000000 |
| H | -7.620753000000 | -1.759259000000 | 0.000024000000  |
| C | -5.389047000000 | -4.935690000000 | -0.000121000000 |
| H | -3.729990000000 | -3.567984000000 | -0.000111000000 |
| C | -6.789200000000 | -5.059137000000 | -0.000107000000 |
| H | -8.677280000000 | -4.009145000000 | -0.000040000000 |
| H | -4.769450000000 | -5.826199000000 | -0.000163000000 |
| C | -6.030487000000 | 2.303549000000  | 0.000016000000  |
| C | -7.429710000000 | 2.189361000000  | -0.000066000000 |
| C | -5.443068000000 | 3.578654000000  | 0.000229000000  |
| C | -8.230262000000 | 3.324571000000  | 0.000056000000  |
| H | -7.879002000000 | 1.203508000000  | -0.000226000000 |
| C | -6.234721000000 | 4.720019000000  | 0.000359000000  |
| H | -4.362872000000 | 3.662197000000  | 0.000307000000  |
| C | -7.635012000000 | 4.597885000000  | 0.000273000000  |
| H | -9.311438000000 | 3.234963000000  | -0.000011000000 |
| H | -5.779803000000 | 5.704888000000  | 0.000534000000  |
| C | -7.393886000000 | -6.359235000000 | -0.000158000000 |
| C | -8.456621000000 | 5.773026000000  | 0.000412000000  |
| N | -9.123340000000 | 6.726537000000  | 0.000525000000  |
| N | -7.884602000000 | -7.414177000000 | -0.000203000000 |
| N | 2.584095000000  | 0.596386000000  | -0.000832000000 |
| C | 3.270482000000  | 0.789451000000  | -1.218568000000 |
| C | 3.270899000000  | 0.795247000000  | 1.215737000000  |
| C | 4.674685000000  | 0.649680000000  | -1.243892000000 |
| C | 2.582020000000  | 1.128926000000  | -2.395948000000 |
| C | 4.675162000000  | 0.655909000000  | 1.241105000000  |
| C | 2.582879000000  | 1.139884000000  | 2.391872000000  |
| C | 5.348594000000  | 0.910453000000  | -2.442109000000 |
| C | 3.277419000000  | 1.358175000000  | -3.579995000000 |
| H | 1.502834000000  | 1.223510000000  | -2.383087000000 |
| C | 5.349543000000  | 0.922729000000  | 2.437733000000  |
| C | 3.278755000000  | 1.374999000000  | 3.574488000000  |
| H | 1.503643000000  | 1.233861000000  | 2.379153000000  |
| C | 4.668241000000  | 1.265053000000  | -3.607113000000 |
| H | 6.428304000000  | 0.809654000000  | -2.467179000000 |
| H | 2.724905000000  | 1.622250000000  | -4.477770000000 |
| H | 6.429312000000  | 0.822531000000  | 2.462739000000  |
| C | 4.669629000000  | 1.282665000000  | 3.601353000000  |

|                                            |                 |                 |                 |
|--------------------------------------------|-----------------|-----------------|-----------------|
| H                                          | 2.726557000000  | 1.643022000000  | 4.471286000000  |
| H                                          | 5.219500000000  | 1.450017000000  | -4.524388000000 |
| H                                          | 5.221266000000  | 1.472268000000  | 4.517453000000  |
| C                                          | 5.384511000000  | 0.085922000000  | -0.000136000000 |
| C                                          | 6.877022000000  | 0.493192000000  | -0.001726000000 |
| C                                          | 7.922917000000  | -0.435467000000 | -0.001334000000 |
| C                                          | 7.208724000000  | 1.860233000000  | -0.004235000000 |
| C                                          | 9.258439000000  | -0.015605000000 | -0.003247000000 |
| H                                          | 7.704269000000  | -1.497166000000 | 0.000464000000  |
| C                                          | 8.535931000000  | 2.281143000000  | -0.006109000000 |
| H                                          | 6.413045000000  | 2.599728000000  | -0.004700000000 |
| C                                          | 9.571619000000  | 1.341335000000  | -0.005602000000 |
| H                                          | 10.050869000000 | -0.759586000000 | -0.002879000000 |
| H                                          | 8.762616000000  | 3.344203000000  | -0.007985000000 |
| H                                          | 10.608322000000 | 1.667228000000  | -0.007057000000 |
| C                                          | 5.225343000000  | -1.469832000000 | 0.004213000000  |
| C                                          | 5.179926000000  | -2.190252000000 | 1.207446000000  |
| C                                          | 5.171861000000  | -2.196717000000 | -1.194746000000 |
| C                                          | 5.082839000000  | -3.583212000000 | 1.213128000000  |
| H                                          | 5.216454000000  | -1.662246000000 | 2.153965000000  |
| C                                          | 5.074689000000  | -3.589739000000 | -1.192180000000 |
| H                                          | 5.202128000000  | -1.673934000000 | -2.144369000000 |
| C                                          | 5.027326000000  | -4.291882000000 | 0.012539000000  |
| H                                          | 5.046946000000  | -4.112144000000 | 2.162187000000  |
| H                                          | 5.032372000000  | -4.123795000000 | -2.138101000000 |
| H                                          | 4.947318000000  | -5.375722000000 | 0.015754000000  |
| <b>TZCN-SSiAS (S<sub>0</sub>, Toluene)</b> |                 |                 |                 |
| <i>E</i> = -2425.93724088 Hartree          |                 |                 |                 |
| C                                          | -5.500199000000 | 1.135514000000  | -0.001679000000 |
| C                                          | -3.531163000000 | -0.000375000000 | -0.000034000000 |
| C                                          | -5.501431000000 | -1.134125000000 | 0.001510000000  |
| N                                          | -4.162576000000 | -1.185275000000 | 0.002285000000  |
| N                                          | -4.161290000000 | 1.185209000000  | -0.002391000000 |
| N                                          | -6.215695000000 | 0.001083000000  | -0.000079000000 |
| C                                          | -2.049741000000 | -0.001173000000 | -0.000034000000 |
| C                                          | -1.337753000000 | 1.209166000000  | -0.016115000000 |
| C                                          | -1.339043000000 | -1.212277000000 | 0.016053000000  |
| C                                          | 0.053820000000  | 1.207935000000  | -0.016718000000 |
| H                                          | -1.884961000000 | 2.144491000000  | -0.028552000000 |
| C                                          | 0.052527000000  | -1.212534000000 | 0.016676000000  |
| H                                          | -1.887248000000 | -2.147019000000 | 0.028485000000  |
| C                                          | 0.754140000000  | -0.002666000000 | -0.000019000000 |
| H                                          | 0.606962000000  | 2.141981000000  | -0.029737000000 |
| H                                          | 0.604670000000  | -2.147173000000 | 0.029705000000  |
| C                                          | -6.241830000000 | 2.422185000000  | -0.002167000000 |
| C                                          | -7.645682000000 | 2.430746000000  | -0.002670000000 |
| C                                          | -5.545187000000 | 3.641063000000  | -0.001583000000 |

|   |                 |                 |                 |
|---|-----------------|-----------------|-----------------|
| C | -8.343901000000 | 3.631582000000  | -0.002500000000 |
| H | -8.179512000000 | 1.488013000000  | -0.003134000000 |
| C | -6.234047000000 | 4.847282000000  | -0.001361000000 |
| H | -4.461836000000 | 3.629866000000  | -0.001091000000 |
| C | -7.639658000000 | 4.847989000000  | -0.001777000000 |
| H | -9.428725000000 | 3.636962000000  | -0.002846000000 |
| H | -5.694544000000 | 5.788461000000  | -0.000765000000 |
| C | -6.244462000000 | -2.419989000000 | 0.002085000000  |
| C | -7.648323000000 | -2.427030000000 | 0.002566000000  |
| C | -5.549138000000 | -3.639619000000 | 0.001606000000  |
| C | -8.347843000000 | -3.627110000000 | 0.002468000000  |
| H | -8.181136000000 | -1.483721000000 | 0.002951000000  |
| C | -6.239304000000 | -4.845090000000 | 0.001459000000  |
| H | -4.465777000000 | -3.629591000000 | 0.001135000000  |
| C | -7.644915000000 | -4.844278000000 | 0.001847000000  |
| H | -9.432674000000 | -3.631319000000 | 0.002792000000  |
| H | -5.700823000000 | -5.786853000000 | 0.000944000000  |
| C | -8.355787000000 | 6.090240000000  | -0.001359000000 |
| C | -8.362372000000 | -6.085761000000 | 0.001506000000  |
| N | -8.944615000000 | -7.093069000000 | 0.001181000000  |
| N | -8.936959000000 | 7.098165000000  | -0.000972000000 |
| N | 2.196012000000  | -0.003329000000 | 0.000002000000  |
| C | 2.827971000000  | 0.021369000000  | 1.271395000000  |
| C | 2.828008000000  | -0.028793000000 | -1.271360000000 |
| C | 4.236123000000  | 0.027302000000  | 1.443029000000  |
| C | 2.013641000000  | 0.040886000000  | 2.429604000000  |
| C | 4.236169000000  | -0.033380000000 | -1.442967000000 |
| C | 2.013721000000  | -0.050481000000 | -2.429562000000 |
| C | 4.760523000000  | 0.053287000000  | 2.750238000000  |
| C | 2.569338000000  | 0.066408000000  | 3.702062000000  |
| H | 0.935739000000  | 0.036043000000  | 2.341439000000  |
| C | 4.760620000000  | -0.060667000000 | -2.750129000000 |
| C | 2.569469000000  | -0.077069000000 | -3.701976000000 |
| H | 0.935813000000  | -0.046618000000 | -2.341426000000 |
| C | 3.954621000000  | 0.073285000000  | 3.880687000000  |
| H | 5.841805000000  | 0.057536000000  | 2.872898000000  |
| H | 1.905128000000  | 0.080828000000  | 4.562436000000  |
| H | 5.841907000000  | -0.064039000000 | -2.872763000000 |
| C | 3.954761000000  | -0.082942000000 | -3.880566000000 |
| H | 1.905291000000  | -0.093216000000 | -4.562344000000 |
| H | 4.389562000000  | 0.093268000000  | 4.875523000000  |
| H | 4.389740000000  | -0.103840000000 | -4.875365000000 |
| C | 6.722140000000  | 1.345794000000  | -0.030362000000 |
| C | 6.726750000000  | -1.343275000000 | 0.030319000000  |
| C | 6.610831000000  | 2.737427000000  | -0.063193000000 |
| C | 8.008333000000  | 0.748494000000  | -0.017719000000 |
| C | 6.620200000000  | -2.735284000000 | 0.063174000000  |
| C | 8.010890000000  | -0.741572000000 | 0.017642000000  |
| C | 7.755260000000  | 3.541391000000  | -0.083641000000 |

|                                          |                 |                 |                 |
|------------------------------------------|-----------------|-----------------|-----------------|
| H                                        | 5.628906000000  | 3.206143000000  | -0.073273000000 |
| C                                        | 9.150601000000  | 1.557056000000  | -0.038877000000 |
| C                                        | 7.767374000000  | -3.535322000000 | 0.083624000000  |
| H                                        | 5.639885000000  | -3.207358000000 | 0.073280000000  |
| C                                        | 9.155923000000  | -1.546222000000 | 0.038795000000  |
| C                                        | 9.019521000000  | 2.947261000000  | -0.071550000000 |
| H                                        | 7.662612000000  | 4.623961000000  | -0.109095000000 |
| H                                        | 10.143530000000 | 1.115473000000  | -0.030741000000 |
| C                                        | 9.029593000000  | -2.936866000000 | 0.071498000000  |
| H                                        | 7.678432000000  | -4.618202000000 | 0.109102000000  |
| H                                        | 10.147343000000 | -1.101253000000 | 0.030633000000  |
| H                                        | 9.910789000000  | 3.569380000000  | -0.087848000000 |
| H                                        | 9.922984000000  | -3.555933000000 | 0.087796000000  |
| Si                                       | 5.402534000000  | -0.001024000000 | 0.000008000000  |
| <b>TZCN-Cbz (S<sub>0</sub>, Toluene)</b> |                 |                 |                 |
| <i>E</i> = -1674.32812742 Hartree        |                 |                 |                 |
| C                                        | 3.085422000000  | -1.129027000000 | 0.111867000000  |
| C                                        | 1.114606000000  | 0.000001000000  | 0.000004000000  |
| C                                        | 3.085422000000  | 1.129026000000  | -0.111872000000 |
| N                                        | 1.747385000000  | 1.179988000000  | -0.115959000000 |
| N                                        | 1.747384000000  | -1.179988000000 | 0.115961000000  |
| N                                        | 3.801417000000  | 0.000000000000  | -0.000003000000 |
| C                                        | -0.362731000000 | 0.000001000000  | 0.000002000000  |
| C                                        | -1.078236000000 | -1.199482000000 | 0.149520000000  |
| C                                        | -1.078235000000 | 1.199484000000  | -0.149517000000 |
| C                                        | -2.467456000000 | -1.201517000000 | 0.157281000000  |
| H                                        | -0.532580000000 | -2.127229000000 | 0.276590000000  |
| C                                        | -2.467456000000 | 1.201519000000  | -0.157280000000 |
| H                                        | -0.532579000000 | 2.127230000000  | -0.276587000000 |
| C                                        | -3.175826000000 | 0.000001000000  | 0.000000000000  |
| H                                        | -3.011122000000 | -2.128606000000 | 0.304710000000  |
| H                                        | -3.011121000000 | 2.128608000000  | -0.304711000000 |
| C                                        | 3.827769000000  | -2.409562000000 | 0.238737000000  |
| C                                        | 5.231562000000  | -2.417842000000 | 0.244779000000  |
| C                                        | 3.131300000000  | -3.623110000000 | 0.353418000000  |
| C                                        | 5.929770000000  | -3.612922000000 | 0.362898000000  |
| H                                        | 5.765453000000  | -1.479335000000 | 0.156060000000  |
| C                                        | 3.819977000000  | -4.823527000000 | 0.471996000000  |
| H                                        | 2.047963000000  | -3.611985000000 | 0.347968000000  |
| C                                        | 5.225599000000  | -4.823975000000 | 0.477260000000  |
| H                                        | 7.014637000000  | -3.617912000000 | 0.367478000000  |
| H                                        | 3.280347000000  | -5.760495000000 | 0.560560000000  |
| C                                        | 3.827769000000  | 2.409561000000  | -0.238739000000 |
| C                                        | 5.231562000000  | 2.417841000000  | -0.244785000000 |
| C                                        | 3.131301000000  | 3.623110000000  | -0.353415000000 |
| C                                        | 5.929771000000  | 3.612921000000  | -0.362902000000 |
| H                                        | 5.765454000000  | 1.479333000000  | -0.156070000000 |

|   |                 |                 |                 |
|---|-----------------|-----------------|-----------------|
| C | 3.819978000000  | 4.823527000000  | -0.471991000000 |
| H | 2.047964000000  | 3.611986000000  | -0.347962000000 |
| C | 5.225600000000  | 4.823974000000  | -0.477259000000 |
| H | 7.014638000000  | 3.617910000000  | -0.367485000000 |
| H | 3.280348000000  | 5.760495000000  | -0.560551000000 |
| C | 5.941403000000  | -6.060356000000 | 0.599125000000  |
| C | 5.941405000000  | 6.060355000000  | -0.599123000000 |
| N | 6.522157000000  | 7.063701000000  | -0.697914000000 |
| N | 6.522155000000  | -7.063701000000 | 0.697918000000  |
| N | -4.589871000000 | 0.000001000000  | -0.000001000000 |
| C | -5.412300000000 | -0.834890000000 | -0.773193000000 |
| C | -5.412301000000 | 0.834891000000  | 0.773191000000  |
| C | -5.062014000000 | -1.796079000000 | -1.725851000000 |
| C | -6.768107000000 | -0.530242000000 | -0.493313000000 |
| C | -5.062016000000 | 1.796080000000  | 1.725850000000  |
| C | -6.768107000000 | 0.530242000000  | 0.493312000000  |
| C | -6.093412000000 | -2.470565000000 | -2.377312000000 |
| H | -4.024925000000 | -2.009354000000 | -1.960967000000 |
| C | -7.785392000000 | -1.222412000000 | -1.160795000000 |
| C | -6.093414000000 | 2.470565000000  | 2.377312000000  |
| H | -4.024926000000 | 2.009356000000  | 1.960966000000  |
| C | -7.785393000000 | 1.222411000000  | 1.160794000000  |
| C | -7.442511000000 | -2.194030000000 | -2.097015000000 |
| H | -5.844343000000 | -3.223610000000 | -3.119851000000 |
| H | -8.828615000000 | -0.999004000000 | -0.953674000000 |
| C | -7.442512000000 | 2.194029000000  | 2.097015000000  |
| H | -5.844345000000 | 3.223609000000  | 3.119851000000  |
| H | -8.828616000000 | 0.999002000000  | 0.953673000000  |
| H | -8.222399000000 | -2.739348000000 | -2.620615000000 |
| H | -8.222401000000 | 2.739345000000  | 2.620615000000  |

**Table S11.** Optimized Cartesian coordinates of T<sub>1</sub> geometries in toluene (PCM).

All geometries were optimized at the B3LYP/6-31G(d) level of theory in toluene.

| <b>TZCN-PXZ (T<sub>1</sub>, Toluene)</b> |                 |                 |                 |
|------------------------------------------|-----------------|-----------------|-----------------|
| <i>E</i> = -1749.50792221 Hartree        |                 |                 |                 |
| C                                        | -3.202154000000 | 1.159157000000  | -0.005862000000 |
| C                                        | -3.191519000000 | -1.132643000000 | 0.003725000000  |
| C                                        | -1.229107000000 | 0.005222000000  | -0.001116000000 |
| N                                        | -1.825476000000 | -1.204853000000 | 0.004703000000  |
| N                                        | -3.897650000000 | -0.017374000000 | -0.001110000000 |
| N                                        | -1.820701000000 | 1.182405000000  | -0.006681000000 |
| C                                        | -3.933161000000 | -2.418096000000 | 0.008598000000  |
| C                                        | -5.339720000000 | -2.439624000000 | 0.008676000000  |
| C                                        | -3.238666000000 | -3.640914000000 | 0.013091000000  |
| C                                        | -6.034052000000 | -3.640266000000 | 0.013090000000  |
| H                                        | -5.873464000000 | -1.496459000000 | 0.005169000000  |
| C                                        | -3.923102000000 | -4.849476000000 | 0.017509000000  |
| H                                        | -2.155526000000 | -3.622640000000 | 0.012904000000  |
| C                                        | -5.329237000000 | -4.860554000000 | 0.017540000000  |
| H                                        | -7.119429000000 | -3.647346000000 | 0.013092000000  |
| H                                        | -3.379585000000 | -5.789196000000 | 0.020907000000  |
| C                                        | -3.921330000000 | 2.400959000000  | -0.009825000000 |
| C                                        | -3.237173000000 | 3.651975000000  | -0.014177000000 |
| C                                        | -5.346774000000 | 2.436910000000  | -0.009202000000 |
| C                                        | -3.923998000000 | 4.847051000000  | -0.017498000000 |
| H                                        | -2.153557000000 | 3.648699000000  | -0.014619000000 |
| C                                        | -6.035906000000 | 3.630112000000  | -0.012538000000 |
| H                                        | -5.888116000000 | 1.498022000000  | -0.005873000000 |
| C                                        | -5.342337000000 | 4.868994000000  | -0.016728000000 |
| H                                        | -3.380676000000 | 5.787670000000  | -0.020685000000 |
| H                                        | -7.122069000000 | 3.631189000000  | -0.011863000000 |
| C                                        | 0.272129000000  | 0.004523000000  | -0.001068000000 |
| C                                        | 0.983855000000  | 1.211502000000  | -0.014126000000 |
| C                                        | 0.979973000000  | -1.204337000000 | 0.012219000000  |
| C                                        | 2.376573000000  | 1.218463000000  | -0.014201000000 |
| H                                        | 0.427537000000  | 2.141145000000  | -0.024201000000 |
| C                                        | 2.374563000000  | -1.214217000000 | 0.012980000000  |
| H                                        | 0.421846000000  | -2.132580000000 | 0.022065000000  |
| C                                        | 3.057360000000  | 0.000295000000  | -0.000413000000 |
| H                                        | 2.928204000000  | 2.153822000000  | -0.024528000000 |
| H                                        | 2.923927000000  | -2.151004000000 | 0.023589000000  |

|   |                 |                 |                 |
|---|-----------------|-----------------|-----------------|
| C | 5.206024000000  | -0.018425000000 | -1.200797000000 |
| C | 5.205238000000  | 0.019099000000  | 1.201305000000  |
| C | 4.557395000000  | -0.035623000000 | -2.452777000000 |
| C | 6.624214000000  | -0.018403000000 | -1.175999000000 |
| C | 6.623444000000  | 0.018850000000  | 1.177441000000  |
| C | 4.555783000000  | 0.038251000000  | 2.452831000000  |
| C | 5.307712000000  | -0.051666000000 | -3.614332000000 |
| H | 3.476397000000  | -0.035291000000 | -2.491455000000 |
| C | 7.375528000000  | -0.035471000000 | -2.349502000000 |
| C | 7.373987000000  | 0.036917000000  | 2.351421000000  |
| H | 3.474761000000  | 0.039209000000  | 2.490788000000  |
| C | 5.305339000000  | 0.055777000000  | 3.614854000000  |
| C | 6.716090000000  | -0.051842000000 | -3.568643000000 |
| H | 4.800450000000  | -0.064072000000 | -4.572484000000 |
| H | 8.456994000000  | -0.034657000000 | -2.276441000000 |
| C | 6.713746000000  | 0.055141000000  | 3.570100000000  |
| H | 8.455501000000  | 0.035937000000  | 2.279078000000  |
| H | 4.797451000000  | 0.070542000000  | 4.572642000000  |
| H | 7.288390000000  | -0.064634000000 | -4.489418000000 |
| H | 7.285438000000  | 0.069298000000  | 4.491233000000  |
| N | 4.513183000000  | -0.000547000000 | 0.000040000000  |
| O | 7.306332000000  | -0.000479000000 | 0.000954000000  |
| C | -6.048095000000 | 6.099928000000  | -0.019877000000 |
| N | -6.627431000000 | 7.115826000000  | -0.022443000000 |
| C | -6.037448000000 | -6.103950000000 | 0.021974000000  |
| N | -6.611379000000 | -7.117678000000 | 0.025551000000  |

**TZCN-DMAC (T<sub>1</sub>, Toluene)**

*E* = -1792.23812067 Hartree

|   |                 |                 |                 |
|---|-----------------|-----------------|-----------------|
| C | 3.627497000000  | -1.144556000000 | -0.010691000000 |
| C | 1.657681000000  | 0.000001000000  | -0.000001000000 |
| C | 3.627501000000  | 1.144565000000  | 0.010690000000  |
| N | 2.245325000000  | 1.193366000000  | 0.012507000000  |
| N | 2.245327000000  | -1.193374000000 | -0.012509000000 |
| N | 4.320412000000  | -0.000005000000 | 0.000000000000  |
| C | 0.152329000000  | 0.000001000000  | -0.000001000000 |
| C | -0.556316000000 | -1.206789000000 | -0.031240000000 |
| C | -0.556318000000 | 1.206790000000  | 0.031239000000  |
| C | -1.950647000000 | -1.215275000000 | -0.031955000000 |
| H | 0.001458000000  | -2.135174000000 | -0.054896000000 |
| C | -1.950647000000 | 1.215275000000  | 0.031954000000  |
| H | 0.001456000000  | 2.135176000000  | 0.054895000000  |

|   |                 |                 |                 |
|---|-----------------|-----------------|-----------------|
| C | -2.632000000000 | -0.000001000000 | 0.000000000000  |
| H | -2.501305000000 | -2.150906000000 | -0.056699000000 |
| H | -2.501306000000 | 2.150905000000  | 0.056698000000  |
| C | 4.360052000000  | -2.403966000000 | -0.020548000000 |
| C | 5.776168000000  | -2.433650000000 | -0.021074000000 |
| C | 3.670936000000  | -3.641220000000 | -0.029441000000 |
| C | 6.467660000000  | -3.630115000000 | -0.029942000000 |
| H | 6.314817000000  | -1.493136000000 | -0.014253000000 |
| C | 4.356826000000  | -4.843191000000 | -0.038232000000 |
| H | 2.587625000000  | -3.630488000000 | -0.028776000000 |
| C | 5.768321000000  | -4.860368000000 | -0.038631000000 |
| H | 7.553430000000  | -3.634057000000 | -0.030158000000 |
| H | 3.812996000000  | -5.783170000000 | -0.044770000000 |
| C | 4.360047000000  | 2.403961000000  | 0.020547000000  |
| C | 5.776170000000  | 2.433651000000  | 0.021074000000  |
| C | 3.670934000000  | 3.641224000000  | 0.029441000000  |
| C | 6.467660000000  | 3.630113000000  | 0.029943000000  |
| H | 6.314822000000  | 1.493138000000  | 0.014252000000  |
| C | 4.356825000000  | 4.843191000000  | 0.038232000000  |
| H | 2.587622000000  | 3.630496000000  | 0.028775000000  |
| C | 5.768324000000  | 4.860372000000  | 0.038632000000  |
| H | 7.553430000000  | 3.634053000000  | 0.030159000000  |
| H | 3.812994000000  | 5.783170000000  | 0.044770000000  |
| C | 6.475061000000  | -6.097464000000 | -0.047329000000 |
| C | 6.475062000000  | 6.097464000000  | 0.047331000000  |
| N | 7.051916000000  | 7.112160000000  | 0.054388000000  |
| N | 7.051914000000  | -7.112159000000 | -0.054387000000 |
| N | -4.091579000000 | -0.000001000000 | 0.000000000000  |
| C | -4.759260000000 | -0.042211000000 | 1.219134000000  |
| C | -4.759261000000 | 0.042210000000  | -1.219134000000 |
| C | -6.180228000000 | -0.045690000000 | 1.259989000000  |
| C | -4.005264000000 | -0.080621000000 | 2.420984000000  |
| C | -6.180228000000 | 0.045690000000  | -1.259988000000 |
| C | -4.005265000000 | 0.080620000000  | -2.420984000000 |
| C | -6.788991000000 | -0.090018000000 | 2.515081000000  |
| C | -4.646585000000 | -0.122330000000 | 3.642367000000  |
| H | -2.925673000000 | -0.076743000000 | 2.376987000000  |
| C | -6.788991000000 | 0.090018000000  | -2.515080000000 |
| C | -4.646586000000 | 0.122329000000  | -3.642367000000 |
| H | -2.925674000000 | 0.076741000000  | -2.376987000000 |
| C | -6.047334000000 | -0.127671000000 | 3.694627000000  |
| H | -7.871230000000 | -0.094692000000 | 2.580590000000  |
| H | -4.061992000000 | -0.151119000000 | 4.555205000000  |

|                                          |                 |                 |                 |
|------------------------------------------|-----------------|-----------------|-----------------|
| H                                        | -7.871231000000 | 0.094692000000  | -2.580589000000 |
| C                                        | -6.047335000000 | 0.127671000000  | -3.694626000000 |
| H                                        | -4.061993000000 | 0.151119000000  | -4.555205000000 |
| H                                        | -6.558681000000 | -0.161007000000 | 4.650787000000  |
| H                                        | -6.558683000000 | 0.161007000000  | -4.650787000000 |
| C                                        | -7.033069000000 | 0.000000000000  | 0.000000000000  |
| C                                        | -7.932762000000 | 1.270848000000  | 0.047406000000  |
| H                                        | -8.576671000000 | 1.319477000000  | -0.834634000000 |
| H                                        | -8.576575000000 | 1.253371000000  | 0.930823000000  |
| H                                        | -7.325396000000 | 2.180175000000  | 0.081450000000  |
| C                                        | -7.932765000000 | -1.270845000000 | -0.047405000000 |
| H                                        | -8.576674000000 | -1.319472000000 | 0.834636000000  |
| H                                        | -8.576579000000 | -1.253367000000 | -0.930821000000 |
| H                                        | -7.325401000000 | -2.180173000000 | -0.081449000000 |
| <b>TZCN-TPA (T<sub>1</sub>, Toluene)</b> |                 |                 |                 |
| <i>E</i> = -1906.55795580 Hartree        |                 |                 |                 |
| C                                        | -1.135710000000 | 0.076568000000  | -5.018367000000 |
| C                                        | 0.000000000000  | 0.000000000000  | -3.039579000000 |
| C                                        | 1.135710000000  | -0.076568000000 | -5.018367000000 |
| N                                        | 1.194644000000  | -0.078822000000 | -3.693219000000 |
| N                                        | -1.194644000000 | 0.078822000000  | -3.693219000000 |
| N                                        | 0.000000000000  | 0.000000000000  | -5.753579000000 |
| C                                        | 0.000000000000  | 0.000000000000  | -1.594492000000 |
| C                                        | -1.214670000000 | 0.058654000000  | -0.852422000000 |
| C                                        | 1.214670000000  | -0.058654000000 | -0.852422000000 |
| C                                        | -1.211359000000 | 0.064969000000  | 0.522831000000  |
| H                                        | -2.151359000000 | 0.092063000000  | -1.396487000000 |
| C                                        | 1.211359000000  | -0.064969000000 | 0.522831000000  |
| H                                        | 2.151359000000  | -0.092063000000 | -1.396487000000 |
| C                                        | 0.000000000000  | 0.000000000000  | 1.278570000000  |
| H                                        | -2.167167000000 | 0.084549000000  | 1.036373000000  |
| H                                        | 2.167167000000  | -0.084549000000 | 1.036373000000  |
| C                                        | -2.419808000000 | 0.165965000000  | -5.762378000000 |
| C                                        | -2.427914000000 | 0.171875000000  | -7.167271000000 |
| C                                        | -3.642251000000 | 0.246796000000  | -5.074051000000 |
| C                                        | -3.623494000000 | 0.255384000000  | -7.870285000000 |
| H                                        | -1.483595000000 | 0.110630000000  | -7.694629000000 |
| C                                        | -4.842549000000 | 0.330512000000  | -5.765450000000 |
| H                                        | -3.631429000000 | 0.242856000000  | -3.990457000000 |
| C                                        | -4.841718000000 | 0.335190000000  | -7.173420000000 |
| H                                        | -3.623743000000 | 0.259491000000  | -8.955603000000 |

|   |                 |                 |                 |
|---|-----------------|-----------------|-----------------|
| H | -5.783730000000 | 0.392550000000  | -5.228632000000 |
| C | 2.419808000000  | -0.165965000000 | -5.762378000000 |
| C | 2.427914000000  | -0.171875000000 | -7.167271000000 |
| C | 3.642251000000  | -0.246796000000 | -5.074051000000 |
| C | 3.623494000000  | -0.255384000000 | -7.870285000000 |
| H | 1.483595000000  | -0.110630000000 | -7.694629000000 |
| C | 4.842549000000  | -0.330512000000 | -5.765450000000 |
| H | 3.631429000000  | -0.242856000000 | -3.990457000000 |
| C | 4.841718000000  | -0.335190000000 | -7.173420000000 |
| H | 3.623743000000  | -0.259491000000 | -8.955603000000 |
| H | 5.783730000000  | -0.392550000000 | -5.228632000000 |
| C | -6.077553000000 | 0.420954000000  | -7.891911000000 |
| C | 6.077553000000  | -0.420954000000 | -7.891911000000 |
| N | 7.083388000000  | -0.490735000000 | -8.474426000000 |
| N | -7.083388000000 | 0.490735000000  | -8.474426000000 |
| C | 0.000000000000  | 0.000000000000  | 2.723583000000  |
| C | -1.157268000000 | 0.363928000000  | 3.484229000000  |
| C | 1.157268000000  | -0.363928000000 | 3.484229000000  |
| C | -1.163163000000 | 0.360579000000  | 4.859575000000  |
| H | -2.051037000000 | 0.698122000000  | 2.971334000000  |
| C | 1.163163000000  | -0.360579000000 | 4.859575000000  |
| H | 2.051037000000  | -0.698122000000 | 2.971334000000  |
| C | 0.000000000000  | 0.000000000000  | 5.588313000000  |
| H | -2.051079000000 | 0.677991000000  | 5.395807000000  |
| H | 2.051079000000  | -0.677991000000 | 5.395807000000  |
| N | 0.000000000000  | 0.000000000000  | 6.988255000000  |
| C | 1.169827000000  | 0.370530000000  | 7.705890000000  |
| C | 1.937485000000  | 1.468665000000  | 7.279873000000  |
| C | 1.559935000000  | -0.358807000000 | 8.842656000000  |
| C | 3.083723000000  | 1.824986000000  | 7.984427000000  |
| H | 1.619631000000  | 2.043098000000  | 6.416371000000  |
| C | 2.706749000000  | 0.010054000000  | 9.538840000000  |
| H | 0.974300000000  | -1.215171000000 | 9.159419000000  |
| C | 3.473346000000  | 1.099943000000  | 9.114173000000  |
| H | 3.667025000000  | 2.680081000000  | 7.656515000000  |
| H | 3.009464000000  | -0.562848000000 | 10.410172000000 |
| H | 4.367536000000  | 1.382791000000  | 9.661144000000  |
| C | -1.169827000000 | -0.370530000000 | 7.705890000000  |
| C | -1.937485000000 | -1.468665000000 | 7.279873000000  |
| C | -1.559935000000 | 0.358807000000  | 8.842656000000  |
| C | -3.083723000000 | -1.824986000000 | 7.984427000000  |
| H | -1.619631000000 | -2.043098000000 | 6.416371000000  |
| C | -2.706749000000 | -0.010054000000 | 9.538840000000  |

|                                          |                 |                 |                 |
|------------------------------------------|-----------------|-----------------|-----------------|
| H                                        | -0.974300000000 | 1.215171000000  | 9.159419000000  |
| C                                        | -3.473346000000 | -1.099943000000 | 9.114173000000  |
| H                                        | -3.667025000000 | -2.680081000000 | 7.656515000000  |
| H                                        | -3.009464000000 | 0.562848000000  | 10.410172000000 |
| H                                        | -4.367536000000 | -1.382791000000 | 9.661144000000  |
| <b>TZCN-PTZ (T<sub>1</sub>, Toluene)</b> |                 |                 |                 |
| <i>E</i> = -2072.47534849 Hartree        |                 |                 |                 |
| C                                        | -3.375604000000 | -1.158790000000 | -0.000010000000 |
| C                                        | -3.364500000000 | 1.132797000000  | -0.000003000000 |
| C                                        | -1.401959000000 | -0.005312000000 | -0.000048000000 |
| N                                        | -1.998497000000 | 1.204739000000  | -0.000025000000 |
| N                                        | -4.070938000000 | 0.017596000000  | 0.000000000000  |
| N                                        | -1.994095000000 | -1.182513000000 | -0.000034000000 |
| C                                        | -4.105887000000 | 2.418354000000  | 0.000006000000  |
| C                                        | -5.512469000000 | 2.440293000000  | 0.000023000000  |
| C                                        | -3.411124000000 | 3.641073000000  | -0.000001000000 |
| C                                        | -6.206507000000 | 3.641095000000  | 0.000032000000  |
| H                                        | -6.046454000000 | 1.497254000000  | 0.000028000000  |
| C                                        | -4.095266000000 | 4.849792000000  | 0.000008000000  |
| H                                        | -2.327986000000 | 3.622482000000  | -0.000014000000 |
| C                                        | -5.501422000000 | 4.861269000000  | 0.000025000000  |
| H                                        | -7.291889000000 | 3.648421000000  | 0.000045000000  |
| H                                        | -3.551495000000 | 5.789377000000  | 0.000002000000  |
| C                                        | -4.095088000000 | -2.400522000000 | -0.000009000000 |
| C                                        | -3.411067000000 | -3.651627000000 | -0.000022000000 |
| C                                        | -5.520536000000 | -2.436369000000 | 0.000004000000  |
| C                                        | -4.098004000000 | -4.846648000000 | -0.000021000000 |
| H                                        | -2.327449000000 | -3.648362000000 | -0.000031000000 |
| C                                        | -6.209804000000 | -3.629478000000 | 0.000005000000  |
| H                                        | -6.061764000000 | -1.497405000000 | 0.000013000000  |
| C                                        | -5.516364000000 | -4.868502000000 | -0.000008000000 |
| H                                        | -3.554747000000 | -5.787316000000 | -0.000030000000 |
| H                                        | -7.295972000000 | -3.630429000000 | 0.000015000000  |
| C                                        | 0.098974000000  | -0.004659000000 | -0.000033000000 |
| C                                        | 0.811293000000  | -1.211517000000 | -0.000047000000 |
| C                                        | 0.807737000000  | 1.203865000000  | -0.000009000000 |
| C                                        | 2.204214000000  | -1.217661000000 | -0.000036000000 |
| H                                        | 0.255240000000  | -2.141444000000 | -0.000066000000 |
| C                                        | 2.202536000000  | 1.212617000000  | 0.000003000000  |
| H                                        | 0.250129000000  | 2.132547000000  | 0.000000000000  |
| C                                        | 2.886788000000  | -0.000791000000 | -0.000008000000 |

|                                          |                 |                 |                 |
|------------------------------------------|-----------------|-----------------|-----------------|
| H                                        | 2.755677000000  | -2.153284000000 | -0.000047000000 |
| H                                        | 2.751969000000  | 2.149522000000  | 0.000022000000  |
| C                                        | 4.990662000000  | -0.001230000000 | 1.236864000000  |
| C                                        | 4.990669000000  | -0.001194000000 | -1.236849000000 |
| C                                        | 4.227319000000  | -0.003554000000 | 2.429875000000  |
| C                                        | 6.407379000000  | 0.000031000000  | 1.362625000000  |
| C                                        | 6.407385000000  | 0.000069000000  | -1.362606000000 |
| C                                        | 4.227327000000  | -0.003486000000 | -2.429860000000 |
| C                                        | 4.843247000000  | -0.004460000000 | 3.665832000000  |
| H                                        | 3.148833000000  | -0.005200000000 | 2.369757000000  |
| C                                        | 7.016530000000  | -0.000648000000 | 2.629955000000  |
| C                                        | 7.016539000000  | -0.000577000000 | -2.629934000000 |
| H                                        | 3.148841000000  | -0.005133000000 | -2.369742000000 |
| C                                        | 4.843258000000  | -0.004361000000 | -3.665816000000 |
| C                                        | 6.245435000000  | -0.002851000000 | 3.776351000000  |
| H                                        | 4.229333000000  | -0.006755000000 | 4.559932000000  |
| H                                        | 8.100282000000  | 0.000306000000  | 2.694325000000  |
| C                                        | 6.245446000000  | -0.002751000000 | -3.776332000000 |
| H                                        | 8.100291000000  | 0.000376000000  | -2.694301000000 |
| H                                        | 4.229345000000  | -0.006632000000 | -4.559917000000 |
| H                                        | 6.720348000000  | -0.003658000000 | 4.751093000000  |
| H                                        | 6.720361000000  | -0.003533000000 | -4.751072000000 |
| N                                        | 4.347567000000  | -0.000121000000 | 0.000005000000  |
| C                                        | -6.222237000000 | -6.099333000000 | -0.000006000000 |
| N                                        | -6.801721000000 | -7.115176000000 | -0.000005000000 |
| C                                        | -6.209326000000 | 6.104813000000  | 0.000035000000  |
| N                                        | -6.783076000000 | 7.118670000000  | 0.000043000000  |
| S                                        | 7.491187000000  | 0.003000000000  | 0.000012000000  |
| <b>TZCN-SAF (T<sub>1</sub>, Toluene)</b> |                 |                 |                 |
| <i>E</i> = -2174.51862716 Hartree        |                 |                 |                 |
| C                                        | -5.249869000000 | -1.132460000000 | -0.000035000000 |
| C                                        | -3.287029000000 | 0.004863000000  | 0.000137000000  |
| C                                        | -5.260045000000 | 1.159140000000  | 0.000061000000  |
| N                                        | -3.878523000000 | 1.182218000000  | 0.000180000000  |
| N                                        | -3.883805000000 | -1.204880000000 | 0.000008000000  |
| N                                        | -5.955803000000 | -0.016974000000 | -0.000036000000 |
| C                                        | -1.785857000000 | 0.003804000000  | 0.000136000000  |
| C                                        | -1.077567000000 | -1.204660000000 | -0.000127000000 |
| C                                        | -1.073501000000 | 1.210301000000  | 0.000401000000  |
| C                                        | 0.317178000000  | -1.214376000000 | -0.000143000000 |
| H                                        | -1.635179000000 | -2.133329000000 | -0.000299000000 |

|   |                 |                 |                 |
|---|-----------------|-----------------|-----------------|
| C | 0.319342000000  | 1.216873000000  | 0.000385000000  |
| H | -1.629205000000 | 2.140418000000  | 0.000596000000  |
| C | 1.000603000000  | -0.000624000000 | 0.000106000000  |
| H | 0.866366000000  | -2.151291000000 | -0.000354000000 |
| H | 0.870956000000  | 2.152265000000  | 0.000587000000  |
| C | -5.991684000000 | -2.417697000000 | -0.000022000000 |
| C | -7.398282000000 | -2.439151000000 | -0.000230000000 |
| C | -5.297316000000 | -3.640649000000 | 0.000199000000  |
| C | -8.092711000000 | -3.639717000000 | -0.000211000000 |
| H | -7.931972000000 | -1.495948000000 | -0.000415000000 |
| C | -5.981867000000 | -4.849133000000 | 0.000227000000  |
| H | -4.214174000000 | -3.622436000000 | 0.000340000000  |
| C | -7.388024000000 | -4.860130000000 | 0.000026000000  |
| H | -9.178094000000 | -3.646681000000 | -0.000371000000 |
| H | -5.438409000000 | -5.788899000000 | 0.000400000000  |
| C | -5.978887000000 | 2.401213000000  | -0.000001000000 |
| C | -7.404320000000 | 2.437833000000  | -0.000048000000 |
| C | -5.294155000000 | 3.651936000000  | -0.000008000000 |
| C | -8.092913000000 | 3.631331000000  | -0.000096000000 |
| H | -7.946107000000 | 1.499191000000  | -0.000042000000 |
| C | -5.980435000000 | 4.847338000000  | -0.000059000000 |
| H | -4.210543000000 | 3.648102000000  | 0.000021000000  |
| C | -7.398770000000 | 4.869967000000  | -0.000102000000 |
| H | -9.179083000000 | 3.632897000000  | -0.000140000000 |
| H | -5.436651000000 | 5.787703000000  | -0.000068000000 |
| C | -8.096340000000 | -6.103435000000 | 0.000063000000  |
| C | -8.103941000000 | 6.101206000000  | -0.000145000000 |
| N | -8.682889000000 | 7.117358000000  | -0.000181000000 |
| N | -8.670451000000 | -7.117092000000 | 0.000096000000  |
| N | 2.459689000000  | -0.001355000000 | 0.000062000000  |
| C | 3.127770000000  | -0.000207000000 | -1.220272000000 |
| C | 3.127843000000  | -0.000896000000 | 1.220358000000  |
| C | 4.546628000000  | 0.000113000000  | -1.263508000000 |
| C | 2.378212000000  | 0.000682000000  | -2.426704000000 |
| C | 4.546702000000  | -0.000600000000 | 1.263515000000  |
| C | 2.378346000000  | -0.000628000000 | 2.426827000000  |
| C | 5.166985000000  | 0.000889000000  | -2.512196000000 |
| C | 3.026239000000  | 0.001682000000  | -3.645160000000 |
| H | 1.298315000000  | 0.000992000000  | -2.386824000000 |
| C | 5.167124000000  | -0.000538000000 | 2.512173000000  |
| C | 3.026436000000  | -0.000292000000 | 3.645250000000  |
| H | 1.298446000000  | -0.000223000000 | 2.386999000000  |
| C | 4.428731000000  | 0.001639000000  | -3.693567000000 |

|                                          |                 |                 |                 |
|------------------------------------------|-----------------|-----------------|-----------------|
| H                                        | 6.250674000000  | 0.001134000000  | -2.557641000000 |
| H                                        | 2.445701000000  | 0.002772000000  | -4.561127000000 |
| H                                        | 6.250815000000  | -0.000333000000 | 2.557561000000  |
| C                                        | 4.428931000000  | -0.000405000000 | 3.693582000000  |
| H                                        | 2.445947000000  | 0.000327000000  | 4.561247000000  |
| H                                        | 4.942300000000  | 0.002493000000  | -4.649138000000 |
| H                                        | 4.942549000000  | -0.000105000000 | 4.649127000000  |
| C                                        | 5.393779000000  | -0.000088000000 | -0.000023000000 |
| C                                        | 6.377813000000  | -1.190807000000 | -0.000449000000 |
| C                                        | 6.377070000000  | 1.191260000000  | 0.000349000000  |
| C                                        | 6.083635000000  | -2.548514000000 | -0.000904000000 |
| C                                        | 7.708488000000  | -0.734050000000 | -0.000388000000 |
| C                                        | 6.081945000000  | 2.548776000000  | 0.000747000000  |
| C                                        | 7.708022000000  | 0.735369000000  | 0.000280000000  |
| C                                        | 7.142452000000  | -3.463526000000 | -0.001392000000 |
| H                                        | 5.055421000000  | -2.900721000000 | -0.000925000000 |
| C                                        | 8.762528000000  | -1.650802000000 | -0.000965000000 |
| C                                        | 7.140201000000  | 3.464416000000  | 0.001198000000  |
| H                                        | 5.053556000000  | 2.900415000000  | 0.000744000000  |
| C                                        | 8.761500000000  | 1.652770000000  | 0.000820000000  |
| C                                        | 8.468483000000  | -3.016198000000 | -0.001457000000 |
| H                                        | 6.931882000000  | -4.528870000000 | -0.001765000000 |
| H                                        | 9.794707000000  | -1.312035000000 | -0.001105000000 |
| C                                        | 8.466537000000  | 3.017958000000  | 0.001273000000  |
| H                                        | 6.928900000000  | 4.529597000000  | 0.001529000000  |
| H                                        | 9.793904000000  | 1.314681000000  | 0.000951000000  |
| H                                        | 9.278920000000  | -3.739315000000 | -0.001893000000 |
| H                                        | 9.276467000000  | 3.741634000000  | 0.001684000000  |
| <b>TZCN-DPA (T<sub>1</sub>, Toluene)</b> |                 |                 |                 |
| <i>E</i> = -1675.50241319 Hartree        |                 |                 |                 |
| C                                        | -2.983611000000 | -1.133938000000 | -0.133905000000 |
| C                                        | -1.008221000000 | 0.000000000000  | -0.000001000000 |
| C                                        | -2.983611000000 | 1.133939000000  | 0.133904000000  |
| N                                        | -1.659491000000 | 1.191811000000  | 0.140771000000  |
| N                                        | -1.659492000000 | -1.191811000000 | -0.140773000000 |
| N                                        | -3.721383000000 | 0.000000000000  | 0.000000000000  |
| C                                        | 0.438761000000  | 0.000000000000  | -0.000002000000 |
| C                                        | 1.177095000000  | -1.214258000000 | -0.131562000000 |
| C                                        | 1.177095000000  | 1.214258000000  | 0.131559000000  |
| C                                        | 2.554685000000  | -1.216530000000 | -0.125820000000 |
| H                                        | 0.629295000000  | -2.141674000000 | -0.245422000000 |

|   |                 |                 |                 |
|---|-----------------|-----------------|-----------------|
| C | 2.554686000000  | 1.216530000000  | 0.125818000000  |
| H | 0.629295000000  | 2.141674000000  | 0.245419000000  |
| C | 3.270845000000  | 0.000000000000  | -0.000001000000 |
| H | 3.099629000000  | -2.147407000000 | -0.249808000000 |
| H | 3.099629000000  | 2.147406000000  | 0.249806000000  |
| C | -3.727019000000 | -2.409883000000 | -0.286353000000 |
| C | -5.132832000000 | -2.416337000000 | -0.287994000000 |
| C | -3.042461000000 | -3.629360000000 | -0.432210000000 |
| C | -5.838294000000 | -3.604684000000 | -0.430581000000 |
| H | -5.657634000000 | -1.475301000000 | -0.176176000000 |
| C | -3.736156000000 | -4.821948000000 | -0.575311000000 |
| H | -1.958794000000 | -3.621687000000 | -0.431226000000 |
| C | -5.145025000000 | -4.819142000000 | -0.575541000000 |
| H | -6.923699000000 | -3.602367000000 | -0.431036000000 |
| H | -3.201387000000 | -5.759711000000 | -0.687583000000 |
| C | -3.727019000000 | 2.409883000000  | 0.286353000000  |
| C | -5.132832000000 | 2.416338000000  | 0.287995000000  |
| C | -3.042460000000 | 3.629360000000  | 0.432209000000  |
| C | -5.838293000000 | 3.604684000000  | 0.430582000000  |
| H | -5.657634000000 | 1.475301000000  | 0.176178000000  |
| C | -3.736155000000 | 4.821948000000  | 0.575311000000  |
| H | -1.958793000000 | 3.621687000000  | 0.431224000000  |
| C | -5.145024000000 | 4.819142000000  | 0.575541000000  |
| H | -6.923699000000 | 3.602368000000  | 0.431038000000  |
| H | -3.201385000000 | 5.759711000000  | 0.687582000000  |
| C | -5.865667000000 | -6.047161000000 | -0.722746000000 |
| C | -5.865666000000 | 6.047162000000  | 0.722747000000  |
| N | -6.449708000000 | 7.047664000000  | 0.842540000000  |
| N | -6.449710000000 | -7.047663000000 | -0.842539000000 |
| N | 4.690712000000  | 0.000000000000  | 0.000000000000  |
| C | 5.386588000000  | 0.954880000000  | -0.767953000000 |
| C | 6.584702000000  | 1.524866000000  | -0.286533000000 |
| C | 4.867463000000  | 1.364966000000  | -2.014134000000 |
| C | 7.248462000000  | 2.478523000000  | -1.047440000000 |
| H | 6.962696000000  | 1.239042000000  | 0.688743000000  |
| C | 5.546702000000  | 2.316648000000  | -2.764166000000 |
| H | 3.956146000000  | 0.912534000000  | -2.387569000000 |
| C | 6.736838000000  | 2.877826000000  | -2.287812000000 |
| H | 8.161171000000  | 2.925317000000  | -0.665517000000 |
| H | 5.151076000000  | 2.616070000000  | -3.729637000000 |
| H | 7.260295000000  | 3.624257000000  | -2.877007000000 |
| C | 5.386587000000  | -0.954881000000 | 0.767953000000  |
| C | 6.584701000000  | -1.524868000000 | 0.286534000000  |

|                                           |                 |                 |                 |
|-------------------------------------------|-----------------|-----------------|-----------------|
| C                                         | 4.867461000000  | -1.364965000000 | 2.014134000000  |
| C                                         | 7.248460000000  | -2.478525000000 | 1.047442000000  |
| H                                         | 6.962696000000  | -1.239045000000 | -0.688742000000 |
| C                                         | 5.546700000000  | -2.316648000000 | 2.764168000000  |
| H                                         | 3.956144000000  | -0.912533000000 | 2.387568000000  |
| C                                         | 6.736836000000  | -2.877827000000 | 2.287814000000  |
| H                                         | 8.161170000000  | -2.925319000000 | 0.665520000000  |
| H                                         | 5.151073000000  | -2.616068000000 | 3.729639000000  |
| H                                         | 7.260292000000  | -3.624257000000 | 2.877010000000  |
| <b>TZCN_DPAS (T<sub>1</sub>, Toluene)</b> |                 |                 |                 |
| <i>E</i> = -2427.12114111 Hartree         |                 |                 |                 |
| C                                         | 5.409584000000  | -1.132858000000 | -0.004205000000 |
| C                                         | 3.447072000000  | 0.005197000000  | 0.001550000000  |
| C                                         | 5.420657000000  | 1.158637000000  | 0.006132000000  |
| N                                         | 4.038919000000  | 1.182451000000  | 0.008854000000  |
| N                                         | 4.043263000000  | -1.204538000000 | -0.006656000000 |
| N                                         | 6.115772000000  | -0.017422000000 | 0.001307000000  |
| C                                         | 1.945792000000  | 0.004496000000  | 0.001893000000  |
| C                                         | 1.236600000000  | -1.202768000000 | -0.037919000000 |
| C                                         | 1.233309000000  | 1.210280000000  | 0.041671000000  |
| C                                         | -0.158362000000 | -1.211627000000 | -0.039057000000 |
| H                                         | 1.793532000000  | -2.131413000000 | -0.068228000000 |
| C                                         | -0.159763000000 | 1.216878000000  | 0.041887000000  |
| H                                         | 1.788907000000  | 2.140020000000  | 0.072274000000  |
| C                                         | -0.841694000000 | 0.000983000000  | 0.001122000000  |
| H                                         | -0.707927000000 | -2.147810000000 | -0.071416000000 |
| H                                         | -0.711173000000 | 2.151895000000  | 0.073991000000  |
| C                                         | 6.150807000000  | -2.418102000000 | -0.007195000000 |
| C                                         | 7.557483000000  | -2.440262000000 | -0.010712000000 |
| C                                         | 5.455989000000  | -3.640916000000 | -0.005728000000 |
| C                                         | 8.251366000000  | -3.641074000000 | -0.012683000000 |
| H                                         | 8.091651000000  | -1.497321000000 | -0.011803000000 |
| C                                         | 6.140033000000  | -4.849633000000 | -0.007496000000 |
| H                                         | 4.372859000000  | -3.622275000000 | -0.002593000000 |
| C                                         | 7.546230000000  | -4.861300000000 | -0.011013000000 |
| H                                         | 9.336750000000  | -3.648460000000 | -0.015472000000 |
| H                                         | 5.596140000000  | -5.789153000000 | -0.006039000000 |
| C                                         | 6.140114000000  | 2.400437000000  | 0.007946000000  |
| C                                         | 7.565535000000  | 2.436603000000  | 0.006656000000  |
| C                                         | 5.455717000000  | 3.651317000000  | 0.010150000000  |
| C                                         | 8.254471000000  | 3.629893000000  | 0.007546000000  |

|    |                |                |                |
|----|----------------|----------------|----------------|
| H  | 8.10704000000  | 1.49779100000  | 0.00484600000  |
| C  | 6.14233000000  | 4.84655500000  | 0.01093400000  |
| H  | 4.37211200000  | 3.64763500000  | 0.01059400000  |
| C  | 7.56065800000  | 4.86875200000  | 0.00966200000  |
| H  | 9.34064100000  | 3.63117800000  | 0.00649200000  |
| H  | 5.59881700000  | 5.78707700000  | 0.01238600000  |
| C  | 8.25404000000  | -6.10481600000 | -0.01269200000 |
| C  | 8.26623000000  | 6.09975900000  | 0.01017600000  |
| N  | 8.84552900000  | 7.11571500000  | 0.01049700000  |
| N  | 8.82780200000  | -7.11869200000 | -0.01394100000 |
| N  | -2.30697300000 | 0.00061200000  | 0.00062100000  |
| C  | -2.92727000000 | -0.06813500000 | 1.26028500000  |
| C  | -2.92634500000 | 0.07095400000  | -1.25936200000 |
| C  | -4.34388800000 | -0.09588100000 | 1.43478900000  |
| C  | -2.08607400000 | -0.11102500000 | 2.40953600000  |
| C  | -4.34287900000 | 0.09725500000  | -1.43495900000 |
| C  | -2.08427700000 | 0.11739200000  | -2.40786800000 |
| C  | -4.84364300000 | -0.16742500000 | 2.73627300000  |
| Si | -5.54569400000 | 0.00000100000  | -0.00054900000 |
| C  | -2.62556700000 | -0.18333000000 | 3.68176200000  |
| H  | -1.01275600000 | -0.08519200000 | 2.30107900000  |
| C  | -4.84167400000 | 0.16998000000  | -2.73673300000 |
| C  | -2.62283500000 | 0.19146000000  | -3.68037700000 |
| H  | -1.01099400000 | 0.09402000000  | -2.29855100000 |
| C  | -4.01120500000 | -0.21381700000 | 3.85933100000  |
| H  | -5.91964000000 | -0.18509700000 | 2.88668400000  |
| H  | -1.96015100000 | -0.21389800000 | 4.53782100000  |
| H  | -5.91756400000 | 0.18653700000  | -2.88801300000 |
| C  | -4.00838200000 | 0.21968100000  | -3.85903400000 |
| H  | -1.95675700000 | 0.22571700000  | -4.53577600000 |
| H  | -4.43883000000 | -0.26993800000 | 4.85492400000  |
| H  | -4.43528400000 | 0.27721000000  | -4.85485600000 |
| C  | -6.60240200000 | -1.55295700000 | -0.09002900000 |
| C  | -7.82250900000 | -1.55549300000 | -0.79394900000 |
| C  | -6.16889400000 | -2.76320700000 | 0.48375900000  |
| C  | -8.57866000000 | -2.72180700000 | -0.91991500000 |
| H  | -8.19612200000 | -0.63708400000 | -1.24017600000 |
| C  | -6.92379600000 | -3.93048600000 | 0.36083700000  |
| H  | -5.23493800000 | -2.79819900000 | 1.03920000000  |
| C  | -8.12985800000 | -3.91126000000 | -0.34240500000 |
| H  | -9.51865400000 | -2.70060600000 | -1.46447800000 |
| H  | -6.57197600000 | -4.85278000000 | 0.81489600000  |
| H  | -8.71900900000 | -4.81915600000 | -0.43788000000 |

|                                           |                 |                 |                 |
|-------------------------------------------|-----------------|-----------------|-----------------|
| C                                         | -6.603973000000 | 1.551755000000  | 0.088200000000  |
| C                                         | -7.825142000000 | 1.552814000000  | 0.790274000000  |
| C                                         | -6.170299000000 | 2.762803000000  | -0.483816000000 |
| C                                         | -8.582260000000 | 2.718513000000  | 0.916077000000  |
| H                                         | -8.198734000000 | 0.633800000000  | 1.235279000000  |
| C                                         | -6.926167000000 | 3.929458000000  | -0.361002000000 |
| H                                         | -5.235409000000 | 2.799064000000  | -1.037577000000 |
| C                                         | -8.133316000000 | 3.908767000000  | 0.340328000000  |
| H                                         | -9.523042000000 | 2.696253000000  | 1.459239000000  |
| H                                         | -6.574118000000 | 4.852415000000  | -0.813486000000 |
| H                                         | -8.723133000000 | 4.816224000000  | 0.435792000000  |
| <b>TZCN-ICbz (T<sub>1</sub>, Toluene)</b> |                 |                 |                 |
| <i>E</i> = -1959.53668527 Hartree         |                 |                 |                 |
| C                                         | 3.721784000000  | 1.124386000000  | -0.331561000000 |
| C                                         | 1.772175000000  | -0.033845000000 | -0.612366000000 |
| C                                         | 3.729688000000  | -1.150746000000 | -0.235603000000 |
| N                                         | 2.427652000000  | -1.226961000000 | -0.452388000000 |
| N                                         | 2.419062000000  | 1.172948000000  | -0.552688000000 |
| N                                         | 4.458274000000  | -0.005427000000 | -0.158933000000 |
| C                                         | 0.349054000000  | -0.049103000000 | -0.845189000000 |
| C                                         | -0.386404000000 | 1.158241000000  | -1.017653000000 |
| C                                         | -0.377778000000 | -1.272335000000 | -0.904950000000 |
| C                                         | -1.755369000000 | 1.145564000000  | -1.223600000000 |
| H                                         | 0.149848000000  | 2.099324000000  | -0.986636000000 |
| C                                         | -1.746729000000 | -1.288727000000 | -1.109373000000 |
| H                                         | 0.165226000000  | -2.202410000000 | -0.785775000000 |
| C                                         | -2.447156000000 | -0.078708000000 | -1.264439000000 |
| H                                         | -2.301188000000 | 2.076905000000  | -1.349556000000 |
| H                                         | -2.285889000000 | -2.231649000000 | -1.145748000000 |
| C                                         | 4.452196000000  | 2.418889000000  | -0.262645000000 |
| C                                         | 5.838422000000  | 2.440348000000  | -0.033886000000 |
| C                                         | 3.773028000000  | 3.638785000000  | -0.424061000000 |
| C                                         | 6.530331000000  | 3.643614000000  | 0.034640000000  |
| H                                         | 6.358610000000  | 1.497881000000  | 0.087547000000  |
| C                                         | 4.452452000000  | 4.846581000000  | -0.357701000000 |
| H                                         | 2.704285000000  | 3.617826000000  | -0.602807000000 |
| C                                         | 5.841961000000  | 4.858631000000  | -0.126164000000 |
| H                                         | 7.601258000000  | 3.652328000000  | 0.211657000000  |
| H                                         | 3.921440000000  | 5.784871000000  | -0.483476000000 |
| C                                         | 4.468569000000  | -2.429809000000 | -0.056360000000 |
| C                                         | 5.847593000000  | -2.421100000000 | 0.212770000000  |

|   |                 |                 |                 |
|---|-----------------|-----------------|-----------------|
| C | 3.804552000000  | -3.664785000000 | -0.152668000000 |
| C | 6.547380000000  | -3.609582000000 | 0.383334000000  |
| H | 6.355518000000  | -1.466991000000 | 0.285263000000  |
| C | 4.492179000000  | -4.858137000000 | 0.014451000000  |
| H | 2.741255000000  | -3.667172000000 | -0.362506000000 |
| C | 5.874465000000  | -4.839859000000 | 0.285359000000  |
| H | 7.612559000000  | -3.595054000000 | 0.591822000000  |
| H | 3.973178000000  | -5.808311000000 | -0.062866000000 |
| C | 6.547705000000  | 6.102099000000  | -0.054831000000 |
| C | 6.588700000000  | -6.068189000000 | 0.460001000000  |
| N | 7.167323000000  | -7.068894000000 | 0.602577000000  |
| N | 7.119408000000  | 7.115147000000  | 0.003925000000  |
| N | -3.882748000000 | -0.090548000000 | -1.400676000000 |
| C | -4.761355000000 | -0.030047000000 | -0.366732000000 |
| C | -4.609677000000 | -0.167880000000 | -2.600234000000 |
| C | -4.531740000000 | 0.058083000000  | 1.026047000000  |
| C | -6.106611000000 | -0.066326000000 | -0.854507000000 |
| C | -4.119205000000 | -0.245820000000 | -3.901597000000 |
| C | -5.994331000000 | -0.155683000000 | -2.303635000000 |
| C | -5.646393000000 | 0.109088000000  | 1.923134000000  |
| N | -3.379562000000 | 0.109884000000  | 1.741427000000  |
| C | -7.173421000000 | -0.016518000000 | 0.030363000000  |
| C | -5.060086000000 | -0.313196000000 | -4.930275000000 |
| H | -3.053175000000 | -0.253092000000 | -4.099633000000 |
| C | -6.916353000000 | -0.223791000000 | -3.347876000000 |
| C | -6.942348000000 | 0.072062000000  | 1.428846000000  |
| C | -5.076362000000 | 0.197573000000  | 3.261630000000  |
| C | -3.668236000000 | 0.196162000000  | 3.103908000000  |
| H | -2.451191000000 | 0.090958000000  | 1.335176000000  |
| H | -8.194354000000 | -0.044189000000 | -0.335974000000 |
| C | -6.437082000000 | -0.302366000000 | -4.659108000000 |
| H | -4.718061000000 | -0.374756000000 | -5.958582000000 |
| H | -7.984527000000 | -0.215895000000 | -3.152095000000 |
| H | -7.790511000000 | 0.110792000000  | 2.104236000000  |
| C | -5.615439000000 | 0.276809000000  | 4.545328000000  |
| C | -2.787136000000 | 0.272484000000  | 4.180270000000  |
| H | -7.142973000000 | -0.355895000000 | -5.482079000000 |
| C | -4.742187000000 | 0.353128000000  | 5.634842000000  |
| H | -6.690015000000 | 0.279622000000  | 4.700838000000  |
| C | -3.350502000000 | 0.351210000000  | 5.454626000000  |
| H | -1.712054000000 | 0.271346000000  | 4.033967000000  |
| H | -5.148645000000 | 0.415256000000  | 6.639362000000  |
| H | -2.698468000000 | 0.412171000000  | 6.319958000000  |

**TZCN-DPAC (T<sub>1</sub>, Toluene)** $E = -2175.70081823$  Hartree

|   |                 |                 |                 |
|---|-----------------|-----------------|-----------------|
| C | -5.025566000000 | 1.162339000000  | 0.001271000000  |
| C | -3.159378000000 | -0.127457000000 | 0.009819000000  |
| C | -5.218161000000 | -1.120841000000 | 0.005062000000  |
| N | -3.842898000000 | -1.254057000000 | 0.011601000000  |
| N | -3.658319000000 | 1.125859000000  | 0.003444000000  |
| N | -5.818183000000 | 0.106769000000  | 0.001444000000  |
| C | -1.662926000000 | -0.245218000000 | 0.014776000000  |
| C | -0.861292000000 | 0.902383000000  | -0.024876000000 |
| C | -1.048303000000 | -1.503888000000 | 0.059013000000  |
| C | 0.530032000000  | 0.802175000000  | -0.022723000000 |
| H | -1.343564000000 | 1.871810000000  | -0.057961000000 |
| C | 0.339536000000  | -1.620490000000 | 0.063302000000  |
| H | -1.675547000000 | -2.386886000000 | 0.090132000000  |
| C | 1.115432000000  | -0.460595000000 | 0.020983000000  |
| H | 1.152514000000  | 1.691299000000  | -0.054475000000 |
| H | 0.815084000000  | -2.596309000000 | 0.099046000000  |
| C | -5.663069000000 | 2.502421000000  | -0.000515000000 |
| C | -7.063520000000 | 2.634836000000  | -0.005588000000 |
| C | -4.874137000000 | 3.666526000000  | 0.003769000000  |
| C | -7.660861000000 | 3.886557000000  | -0.006314000000 |
| H | -7.669878000000 | 1.736599000000  | -0.008767000000 |
| C | -5.460991000000 | 4.925379000000  | 0.003164000000  |
| H | -3.795833000000 | 3.562611000000  | 0.008098000000  |
| C | -6.861898000000 | 5.047427000000  | -0.001870000000 |
| H | -8.742278000000 | 3.979307000000  | -0.010167000000 |
| H | -4.844857000000 | 5.819183000000  | 0.006729000000  |
| C | -6.034401000000 | -2.300917000000 | 0.001339000000  |
| C | -7.458074000000 | -2.221480000000 | -0.004049000000 |
| C | -5.453321000000 | -3.602926000000 | 0.001982000000  |
| C | -8.241190000000 | -3.355117000000 | -0.008506000000 |
| H | -7.920871000000 | -1.241368000000 | -0.004620000000 |
| C | -6.234291000000 | -4.738712000000 | -0.002556000000 |
| H | -4.372911000000 | -3.686433000000 | 0.005513000000  |
| C | -7.649895000000 | -4.646096000000 | -0.007941000000 |
| H | -9.323872000000 | -3.268717000000 | -0.012566000000 |
| H | -5.768353000000 | -5.719970000000 | -0.002203000000 |
| C | -7.469873000000 | 6.342765000000  | -0.002252000000 |
| C | -8.453127000000 | -5.815610000000 | -0.012835000000 |
| N | -9.113090000000 | -6.781145000000 | -0.016909000000 |

|   |                 |                 |                 |
|---|-----------------|-----------------|-----------------|
| N | -7.962051000000 | 7.398638000000  | -0.002466000000 |
| N | 2.570866000000  | -0.555186000000 | 0.024082000000  |
| C | 3.244406000000  | -0.592390000000 | 1.240353000000  |
| C | 3.243601000000  | -0.710671000000 | -1.181977000000 |
| C | 4.664112000000  | -0.511722000000 | 1.266630000000  |
| C | 2.512460000000  | -0.763408000000 | 2.441646000000  |
| C | 4.664536000000  | -0.640110000000 | -1.214398000000 |
| C | 2.511708000000  | -0.994436000000 | -2.362249000000 |
| C | 5.303354000000  | -0.680190000000 | 2.490993000000  |
| C | 3.181009000000  | -0.909658000000 | 3.643525000000  |
| H | 1.432691000000  | -0.804805000000 | 2.411581000000  |
| C | 5.303513000000  | -0.942046000000 | -2.412887000000 |
| C | 3.180453000000  | -1.268655000000 | -3.541119000000 |
| H | 1.431585000000  | -1.022237000000 | -2.330654000000 |
| C | 4.580483000000  | -0.886471000000 | 3.670680000000  |
| H | 6.385265000000  | -0.634564000000 | 2.530092000000  |
| H | 2.615448000000  | -1.054466000000 | 4.557425000000  |
| H | 6.385963000000  | -0.913800000000 | -2.453696000000 |
| C | 4.580297000000  | -1.263493000000 | -3.566379000000 |
| H | 2.615085000000  | -1.500090000000 | -4.437098000000 |
| H | 5.110922000000  | -1.016728000000 | 4.608131000000  |
| H | 5.110898000000  | -1.496785000000 | -4.483539000000 |
| C | 5.425111000000  | -0.107392000000 | 0.002388000000  |
| C | 6.866179000000  | -0.666235000000 | 0.035602000000  |
| C | 7.997184000000  | 0.155340000000  | 0.019620000000  |
| C | 7.049907000000  | -2.058796000000 | 0.092873000000  |
| C | 9.281376000000  | -0.399580000000 | 0.057278000000  |
| H | 7.887082000000  | 1.232831000000  | -0.022002000000 |
| C | 8.327414000000  | -2.611718000000 | 0.129638000000  |
| H | 6.184380000000  | -2.716113000000 | 0.108965000000  |
| C | 9.451830000000  | -1.780967000000 | 0.111543000000  |
| H | 10.146076000000 | 0.257840000000  | 0.043732000000  |
| H | 8.445067000000  | -3.690840000000 | 0.172828000000  |
| H | 10.449282000000 | -2.210029000000 | 0.140159000000  |
| C | 5.407196000000  | 1.464456000000  | -0.086535000000 |
| C | 5.495812000000  | 2.115575000000  | -1.327207000000 |
| C | 5.355099000000  | 2.258742000000  | 1.069166000000  |
| C | 5.534274000000  | 3.507955000000  | -1.408750000000 |
| H | 5.538409000000  | 1.543744000000  | -2.246470000000 |
| C | 5.391909000000  | 3.652032000000  | 0.987410000000  |
| H | 5.287943000000  | 1.801327000000  | 2.048758000000  |
| C | 5.478715000000  | 4.284965000000  | -0.251716000000 |
| H | 5.603475000000  | 3.981896000000  | -2.383744000000 |

|                                            |                 |                 |                 |
|--------------------------------------------|-----------------|-----------------|-----------------|
| H                                          | 5.348902000000  | 4.239118000000  | 1.900374000000  |
| H                                          | 5.501614000000  | 5.368881000000  | -0.315448000000 |
| <b>TZCN-SSiAS (T<sub>1</sub>, Toluene)</b> |                 |                 |                 |
| <i>E</i> = -2425.92935473 Hartree          |                 |                 |                 |
| C                                          | -5.512834000000 | 1.144921000000  | -0.000839000000 |
| C                                          | -3.543276000000 | -0.000188000000 | 0.000076000000  |
| C                                          | -5.513467000000 | -1.144319000000 | 0.000872000000  |
| N                                          | -4.131264000000 | -1.193455000000 | 0.001881000000  |
| N                                          | -4.130654000000 | 1.193475000000  | -0.001772000000 |
| N                                          | -6.206071000000 | 0.000574000000  | 0.000008000000  |
| C                                          | -2.038241000000 | -0.000580000000 | 0.000121000000  |
| C                                          | -1.328716000000 | 1.206119000000  | -0.015416000000 |
| C                                          | -1.329346000000 | -1.207653000000 | 0.015692000000  |
| C                                          | 0.065726000000  | 1.213856000000  | -0.015853000000 |
| H                                          | -1.885956000000 | 2.135118000000  | -0.027175000000 |
| C                                          | 0.065084000000  | -1.216123000000 | 0.016165000000  |
| H                                          | -1.887077000000 | -2.136356000000 | 0.027437000000  |
| C                                          | 0.747123000000  | -0.001307000000 | 0.000164000000  |
| H                                          | 0.616701000000  | 2.149605000000  | -0.028236000000 |
| H                                          | 0.615563000000  | -2.152164000000 | 0.028556000000  |
| C                                          | -6.245045000000 | 2.404679000000  | -0.000545000000 |
| C                                          | -7.661112000000 | 2.434830000000  | -0.001097000000 |
| C                                          | -5.555514000000 | 3.641681000000  | 0.000650000000  |
| C                                          | -8.352212000000 | 3.631578000000  | -0.000559000000 |
| H                                          | -8.200075000000 | 1.494476000000  | -0.001968000000 |
| C                                          | -6.241003000000 | 4.843951000000  | 0.001267000000  |
| H                                          | -4.472210000000 | 3.630571000000  | 0.001368000000  |
| C                                          | -7.652442000000 | 4.861572000000  | 0.000638000000  |
| H                                          | -9.437979000000 | 3.635905000000  | -0.001043000000 |
| H                                          | -5.696861000000 | 5.783767000000  | 0.002311000000  |
| C                                          | -6.246279000000 | -2.403563000000 | 0.000521000000  |
| C                                          | -7.662420000000 | -2.432991000000 | 0.001015000000  |
| C                                          | -5.557445000000 | -3.641022000000 | -0.000687000000 |
| C                                          | -8.354152000000 | -3.629343000000 | 0.000412000000  |
| H                                          | -8.200894000000 | -1.492357000000 | 0.001890000000  |
| C                                          | -6.243592000000 | -4.842881000000 | -0.001369000000 |
| H                                          | -4.474133000000 | -3.630545000000 | -0.001366000000 |
| C                                          | -7.655079000000 | -4.859771000000 | -0.000795000000 |
| H                                          | -9.439922000000 | -3.633060000000 | 0.000850000000  |
| H                                          | -5.699957000000 | -5.782994000000 | -0.002424000000 |
| C                                          | -8.358770000000 | 6.098982000000  | 0.001276000000  |

|   |                |                |                |
|---|----------------|----------------|----------------|
| C | -8.36207000000 | -6.09676200000 | -0.00150200000 |
| N | -8.93912500000 | -7.11136200000 | -0.00209800000 |
| N | -8.93525900000 | 7.11388700000  | 0.00181600000  |
| N | 2.21268500000  | -0.00163600000 | 0.00014600000  |
| C | 2.83229700000  | 0.02139500000  | 1.26167400000  |
| C | 2.83221200000  | -0.02505500000 | -1.26141100000 |
| C | 4.24916000000  | 0.02626700000  | 1.43774700000  |
| C | 1.99284200000  | 0.03996600000  | 2.41267500000  |
| C | 4.24906300000  | -0.02953200000 | -1.43759100000 |
| C | 1.99267000000  | -0.04452900000 | -2.41233100000 |
| C | 4.75361100000  | 0.04968800000  | 2.73909900000  |
| C | 2.53547000000  | 0.06304100000  | 3.68559400000  |
| H | 0.91907100000  | 0.03586800000  | 2.30513400000  |
| C | 4.75341600000  | -0.05377700000 | -2.73896700000 |
| C | 2.53520200000  | -0.06836000000 | -3.68527700000 |
| H | 0.91890600000  | -0.04063500000 | -2.30470500000 |
| C | 3.92177800000  | 0.06835900000  | 3.86320300000  |
| H | 5.83029500000  | 0.05326200000  | 2.88518000000  |
| H | 1.87139300000  | 0.07674600000  | 4.54311600000  |
| H | 5.83008900000  | -0.05712700000 | -2.88513400000 |
| C | 3.92149800000  | -0.07351300000 | -3.86299000000 |
| H | 1.87106100000  | -0.08281500000 | -4.54273600000 |
| H | 4.34991900000  | 0.08640900000  | 4.85993000000  |
| H | 4.34956500000  | -0.09220100000 | -4.85973700000 |
| C | 6.73305600000  | 1.35222100000  | -0.02880800000 |
| C | 6.73553600000  | -1.35095700000 | 0.02868400000  |
| C | 6.61883900000  | 2.74343900000  | -0.06005300000 |
| C | 8.01665100000  | 0.74672400000  | -0.01751800000 |
| C | 6.62386500000  | -2.74238700000 | 0.05989400000  |
| C | 8.01802200000  | -0.74311600000 | 0.01727600000  |
| C | 7.76576000000  | 3.54308700000  | -0.08064700000 |
| H | 5.63882800000  | 3.21505700000  | -0.06888800000 |
| C | 9.15842100000  | 1.55450700000  | -0.04003700000 |
| C | 7.77225200000  | -3.53993100000 | 0.08034100000  |
| H | 5.64472600000  | -3.21582100000 | 0.06880600000  |
| C | 9.16127900000  | -1.54880500000 | 0.03965500000  |
| C | 9.02789400000  | 2.94484500000  | -0.07109200000 |
| H | 7.67575400000  | 4.62525400000  | -0.10474200000 |
| H | 10.15036000000 | 1.11204200000  | -0.03471300000 |
| C | 9.03329100000  | -2.93938000000 | 0.07068300000  |
| H | 7.68423200000  | -4.62226200000 | 0.10440700000  |
| H | 10.15241500000 | -1.10453200000 | 0.03423800000  |
| H | 9.91988700000  | 3.56497900000  | -0.08827800000 |

|                                          |                 |                 |                 |
|------------------------------------------|-----------------|-----------------|-----------------|
| H                                        | 9.926415000000  | -3.557886000000 | 0.087758000000  |
| Si                                       | 5.438835000000  | -0.000562000000 | 0.000018000000  |
| <b>TZCN-Cbz (T<sub>1</sub>, Toluene)</b> |                 |                 |                 |
| <i>E</i> = -1674.32354198 Hartree        |                 |                 |                 |
| C                                        | 3.063762000000  | -1.135914000000 | 0.111174000000  |
| C                                        | 1.086766000000  | 0.000000000000  | -0.000001000000 |
| C                                        | 3.063762000000  | 1.135914000000  | -0.111175000000 |
| N                                        | 1.740854000000  | 1.195365000000  | -0.117098000000 |
| N                                        | 1.740854000000  | -1.195365000000 | 0.117097000000  |
| N                                        | 3.802093000000  | 0.000000000000  | -0.000001000000 |
| C                                        | -0.355858000000 | 0.000000000000  | 0.000000000000  |
| C                                        | -1.096176000000 | -1.216772000000 | 0.109808000000  |
| C                                        | -1.096176000000 | 1.216772000000  | -0.109809000000 |
| C                                        | -2.474031000000 | -1.219418000000 | 0.101094000000  |
| H                                        | -0.548805000000 | -2.146011000000 | 0.210376000000  |
| C                                        | -2.474031000000 | 1.219418000000  | -0.101094000000 |
| H                                        | -0.548805000000 | 2.146011000000  | -0.210377000000 |
| C                                        | -3.185051000000 | 0.000000000000  | 0.000000000000  |
| H                                        | -3.019731000000 | -2.150833000000 | 0.219533000000  |
| H                                        | -3.019732000000 | 2.150833000000  | -0.219533000000 |
| C                                        | 3.809170000000  | -2.415012000000 | 0.238320000000  |
| C                                        | 5.214526000000  | -2.420580000000 | 0.238937000000  |
| C                                        | 3.125227000000  | -3.636972000000 | 0.360925000000  |
| C                                        | 5.920888000000  | -3.611260000000 | 0.357665000000  |
| H                                        | 5.738734000000  | -1.477209000000 | 0.145520000000  |
| C                                        | 3.819614000000  | -4.832039000000 | 0.480154000000  |
| H                                        | 2.041566000000  | -3.629298000000 | 0.361163000000  |
| C                                        | 5.228168000000  | -4.828371000000 | 0.479208000000  |
| H                                        | 7.006273000000  | -3.608452000000 | 0.357396000000  |
| H                                        | 3.285408000000  | -5.772079000000 | 0.574604000000  |
| C                                        | 3.809170000000  | 2.415012000000  | -0.238321000000 |
| C                                        | 5.214526000000  | 2.420580000000  | -0.238937000000 |
| C                                        | 3.125228000000  | 3.636972000000  | -0.360926000000 |
| C                                        | 5.920888000000  | 3.611260000000  | -0.357664000000 |
| H                                        | 5.738734000000  | 1.477209000000  | -0.145520000000 |
| C                                        | 3.819614000000  | 4.832039000000  | -0.480155000000 |
| H                                        | 2.041566000000  | 3.629298000000  | -0.361165000000 |
| C                                        | 5.228168000000  | 4.828371000000  | -0.479208000000 |
| H                                        | 7.006273000000  | 3.608452000000  | -0.357395000000 |
| H                                        | 3.285409000000  | 5.772079000000  | -0.574604000000 |
| C                                        | 5.949595000000  | -6.058961000000 | 0.601571000000  |

|   |                 |                 |                 |
|---|-----------------|-----------------|-----------------|
| C | 5.949595000000  | 6.058961000000  | -0.601569000000 |
| N | 6.534193000000  | 7.061254000000  | -0.701092000000 |
| N | 6.534193000000  | -7.061254000000 | 0.701094000000  |
| N | -4.603490000000 | 0.000000000000  | 0.000000000000  |
| C | -5.416358000000 | -0.771189000000 | -0.830154000000 |
| C | -5.416358000000 | 0.771190000000  | 0.830154000000  |
| C | -5.037694000000 | -1.648979000000 | -1.853728000000 |
| C | -6.778109000000 | -0.497854000000 | -0.532777000000 |
| C | -5.037693000000 | 1.648979000000  | 1.853728000000  |
| C | -6.778109000000 | 0.497855000000  | 0.532778000000  |
| C | -6.057708000000 | -2.289924000000 | -2.557356000000 |
| H | -3.995040000000 | -1.814996000000 | -2.096311000000 |
| C | -7.776115000000 | -1.138544000000 | -1.252027000000 |
| C | -6.057708000000 | 2.289924000000  | 2.557356000000  |
| H | -3.995040000000 | 1.814996000000  | 2.096311000000  |
| C | -7.776115000000 | 1.138544000000  | 1.252027000000  |
| C | -7.405265000000 | -2.044560000000 | -2.261063000000 |
| H | -5.800414000000 | -2.980765000000 | -3.353370000000 |
| H | -8.824622000000 | -0.941555000000 | -1.051001000000 |
| C | -7.405265000000 | 2.044560000000  | 2.261064000000  |
| H | -5.800414000000 | 2.980765000000  | 3.353370000000  |
| H | -8.824622000000 | 0.941555000000  | 1.051002000000  |
| H | -8.178338000000 | -2.552721000000 | -2.828530000000 |
| H | -8.178337000000 | 2.552721000000  | 2.828531000000  |

**Table S12.** Optimized Cartesian coordinates of donor units (Figure 2) in the gas phase.

All geometries were optimized at the B3LYP/6-31G(d) level of theory.

|                                        |                 |                 |                 |
|----------------------------------------|-----------------|-----------------|-----------------|
| <b>PXZ (S<sub>0</sub>, Gas Phase)</b>  |                 |                 |                 |
| <i>E</i> = -592.668196893 Hartree      |                 |                 |                 |
| C                                      | 1.208632000000  | 0.727447000000  | 0.095025000000  |
| C                                      | -1.208632000000 | 0.727447000000  | 0.095025000000  |
| C                                      | 2.434957000000  | 1.379890000000  | -0.042809000000 |
| C                                      | 1.185643000000  | -0.678292000000 | 0.095152000000  |
| C                                      | -1.185643000000 | -0.678292000000 | 0.095153000000  |
| C                                      | -2.434957000000 | 1.379890000000  | -0.042808000000 |
| C                                      | 3.618854000000  | 0.646489000000  | -0.167651000000 |
| H                                      | 2.459215000000  | 2.467441000000  | -0.043933000000 |
| C                                      | 2.357544000000  | -1.408283000000 | -0.036286000000 |
| C                                      | -2.357544000000 | -1.408283000000 | -0.036286000000 |
| H                                      | -2.459215000000 | 2.467441000000  | -0.043933000000 |
| C                                      | -3.618854000000 | 0.646489000000  | -0.167652000000 |
| C                                      | 3.583924000000  | -0.745590000000 | -0.163263000000 |
| H                                      | 4.563754000000  | 1.172451000000  | -0.268187000000 |
| H                                      | 2.294278000000  | -2.491954000000 | -0.033778000000 |
| C                                      | -3.583924000000 | -0.745590000000 | -0.163263000000 |
| H                                      | -2.294278000000 | -2.491954000000 | -0.033778000000 |
| H                                      | -4.563754000000 | 1.172451000000  | -0.268187000000 |
| H                                      | 4.499273000000  | -1.321451000000 | -0.259312000000 |
| H                                      | -4.499273000000 | -1.321450000000 | -0.259313000000 |
| N                                      | 0.000000000000  | 1.414536000000  | 0.256409000000  |
| O                                      | 0.000000000000  | -1.377110000000 | 0.251349000000  |
| H                                      | 0.000000000000  | 2.402226000000  | 0.042750000000  |
| <b>DMAC (S<sub>0</sub>, Gas Phase)</b> |                 |                 |                 |
| <i>E</i> = -635.399293422 Hartree      |                 |                 |                 |
| N                                      | 0.000033000000  | -1.687425000000 | 0.000302000000  |
| C                                      | 1.223408000000  | -1.034449000000 | -0.000114000000 |
| C                                      | -1.223355000000 | -1.034468000000 | 0.000275000000  |
| C                                      | 1.273957000000  | 0.373478000000  | -0.000259000000 |
| C                                      | 2.407057000000  | -1.792262000000 | -0.000230000000 |
| C                                      | -1.273944000000 | 0.373458000000  | 0.000169000000  |
| C                                      | -2.406988000000 | -1.792306000000 | 0.000215000000  |
| C                                      | 2.540176000000  | 0.971737000000  | -0.000146000000 |
| C                                      | 3.646856000000  | -1.165832000000 | -0.000313000000 |
| H                                      | 2.340274000000  | -2.878600000000 | -0.000172000000 |

|                                       |                 |                 |                 |
|---------------------------------------|-----------------|-----------------|-----------------|
| C                                     | -2.540171000000 | 0.971691000000  | -0.000299000000 |
| C                                     | -3.646801000000 | -1.165903000000 | -0.000060000000 |
| H                                     | -2.340180000000 | -2.878643000000 | 0.000307000000  |
| C                                     | 3.719754000000  | 0.228277000000  | -0.000197000000 |
| H                                     | 2.608954000000  | 2.056193000000  | 0.000046000000  |
| H                                     | 4.552681000000  | -1.766205000000 | -0.000343000000 |
| H                                     | -2.608970000000 | 2.056147000000  | -0.000623000000 |
| C                                     | -3.719733000000 | 0.228205000000  | -0.000387000000 |
| H                                     | -4.552612000000 | -1.766297000000 | -0.000152000000 |
| H                                     | 4.681723000000  | 0.732249000000  | -0.000115000000 |
| H                                     | -4.681713000000 | 0.732154000000  | -0.000732000000 |
| C                                     | -0.000034000000 | 1.237895000000  | 0.000129000000  |
| C                                     | -0.000427000000 | 2.137082000000  | -1.265240000000 |
| H                                     | -0.884946000000 | 2.782635000000  | -1.289526000000 |
| H                                     | 0.883630000000  | 2.783244000000  | -1.289699000000 |
| H                                     | -0.000315000000 | 1.526785000000  | -2.174188000000 |
| C                                     | 0.000265000000  | 2.136481000000  | 1.265942000000  |
| H                                     | 0.884725000000  | 2.782109000000  | 1.290509000000  |
| H                                     | -0.883899000000 | 2.782494000000  | 1.290714000000  |
| H                                     | 0.000246000000  | 1.525744000000  | 2.174595000000  |
| H                                     | 0.000042000000  | -2.696535000000 | 0.000352000000  |
| <b>TPA (S<sub>0</sub>, Gas Phase)</b> |                 |                 |                 |
| <i>E</i> = -749.697345315 Hartree     |                 |                 |                 |
| C                                     | -4.235700000000 | 0.036419000000  | 0.000074000000  |
| C                                     | -3.521180000000 | 0.937728000000  | -0.791956000000 |
| C                                     | -3.536702000000 | -0.877035000000 | 0.792038000000  |
| C                                     | -2.127748000000 | 0.923430000000  | -0.802573000000 |
| H                                     | -4.050187000000 | 1.650167000000  | -1.419744000000 |
| C                                     | -2.143230000000 | -0.886702000000 | 0.802491000000  |
| H                                     | -4.077813000000 | -1.580270000000 | 1.419887000000  |
| C                                     | -1.421775000000 | 0.012217000000  | -0.000092000000 |
| H                                     | -1.578136000000 | 1.616947000000  | -1.431014000000 |
| H                                     | -1.605563000000 | -1.589568000000 | 1.430871000000  |
| N                                     | -0.000200000000 | -0.000017000000 | -0.000186000000 |
| C                                     | 0.700174000000  | -1.237212000000 | -0.000092000000 |
| C                                     | 0.265336000000  | -2.303675000000 | -0.803971000000 |
| C                                     | 1.838297000000  | -1.412880000000 | 0.803939000000  |
| C                                     | 0.949846000000  | -3.517476000000 | -0.793245000000 |
| H                                     | -0.609259000000 | -2.174140000000 | -1.433481000000 |
| C                                     | 2.526873000000  | -2.624377000000 | 0.793621000000  |
| H                                     | 2.177168000000  | -0.596149000000 | 1.433297000000  |

|                                       |                 |                 |                 |
|---------------------------------------|-----------------|-----------------|-----------------|
| C                                     | 2.086554000000  | -3.685969000000 | 0.000305000000  |
| H                                     | 0.598393000000  | -4.331468000000 | -1.422081000000 |
| H                                     | 3.405603000000  | -2.741689000000 | 1.422595000000  |
| H                                     | 2.621721000000  | -4.631265000000 | 0.000472000000  |
| C                                     | 0.721279000000  | 1.224988000000  | -0.000159000000 |
| C                                     | 0.305033000000  | 2.298439000000  | 0.804251000000  |
| C                                     | 1.861982000000  | 1.381398000000  | -0.804498000000 |
| C                                     | 1.010287000000  | 3.500304000000  | 0.793821000000  |
| H                                     | -0.571431000000 | 2.183648000000  | 1.434018000000  |
| C                                     | 2.571289000000  | 2.580878000000  | -0.793874000000 |
| H                                     | 2.186487000000  | 0.559227000000  | -1.434350000000 |
| C                                     | 2.149508000000  | 3.649546000000  | 0.000019000000  |
| H                                     | 0.673060000000  | 4.319957000000  | 1.423094000000  |
| H                                     | 3.451707000000  | 2.683350000000  | -1.423079000000 |
| H                                     | 2.700850000000  | 4.585500000000  | 0.000083000000  |
| H                                     | -5.321934000000 | 0.045760000000  | 0.000130000000  |
| <b>PTZ (S<sub>0</sub>, Gas Phase)</b> |                 |                 |                 |
| <i>E</i> = -915.643610053 Hartree     |                 |                 |                 |
| C                                     | 0.746910000000  | -0.242548000000 | 1.230469000000  |
| C                                     | 0.746910000000  | -0.242548000000 | -1.230469000000 |
| C                                     | 1.567329000000  | -0.014128000000 | 2.341953000000  |
| C                                     | -0.644359000000 | -0.087242000000 | 1.364873000000  |
| C                                     | -0.644359000000 | -0.087242000000 | -1.364873000000 |
| C                                     | 1.567329000000  | -0.014128000000 | -2.341953000000 |
| C                                     | 1.013797000000  | 0.344143000000  | 3.570817000000  |
| H                                     | 2.644949000000  | -0.125846000000 | 2.239515000000  |
| C                                     | -1.187230000000 | 0.310557000000  | 2.586994000000  |
| C                                     | -1.187230000000 | 0.310557000000  | -2.586994000000 |
| H                                     | 2.644949000000  | -0.125846000000 | -2.239515000000 |
| C                                     | 1.013797000000  | 0.344143000000  | -3.570817000000 |
| C                                     | -0.364562000000 | 0.513804000000  | 3.697131000000  |
| H                                     | 1.666829000000  | 0.503025000000  | 4.424312000000  |
| H                                     | -2.262152000000 | 0.445676000000  | 2.669095000000  |
| C                                     | -0.364562000000 | 0.513804000000  | -3.697131000000 |
| H                                     | -2.262152000000 | 0.445676000000  | -2.669095000000 |
| H                                     | 1.666829000000  | 0.503025000000  | -4.424312000000 |
| H                                     | -0.800297000000 | 0.804549000000  | 4.648252000000  |
| H                                     | -0.800297000000 | 0.804549000000  | -4.648252000000 |
| N                                     | 1.301589000000  | -0.630892000000 | 0.000000000000  |
| S                                     | -1.719076000000 | -0.503654000000 | 0.000000000000  |
| H                                     | 2.312807000000  | -0.675144000000 | 0.000000000000  |

**SAF (S<sub>0</sub>, Gas Phase)** $E = -1017.67973581$  Hartree

|   |                 |                 |                 |
|---|-----------------|-----------------|-----------------|
| N | -2.934482000000 | -0.000001000000 | 0.181379000000  |
| C | -2.300265000000 | -1.219888000000 | -0.031347000000 |
| C | -2.300265000000 | 1.219888000000  | -0.031339000000 |
| C | -0.903961000000 | -1.270804000000 | -0.195175000000 |
| C | -3.062054000000 | -2.400127000000 | -0.076216000000 |
| C | -0.903961000000 | 1.270805000000  | -0.195167000000 |
| C | -3.062055000000 | 2.400127000000  | -0.076203000000 |
| C | -0.309866000000 | -2.521804000000 | -0.400674000000 |
| C | -2.445852000000 | -3.628366000000 | -0.278166000000 |
| H | -4.141697000000 | -2.339738000000 | 0.047154000000  |
| C | -0.309866000000 | 2.521806000000  | -0.400661000000 |
| C | -2.445853000000 | 3.628368000000  | -0.278146000000 |
| H | -4.141697000000 | 2.339737000000  | 0.047167000000  |
| C | -1.059724000000 | -3.694637000000 | -0.443544000000 |
| H | 0.767604000000  | -2.571724000000 | -0.527331000000 |
| H | -3.048316000000 | -4.532206000000 | -0.310782000000 |
| H | 0.767603000000  | 2.571726000000  | -0.527317000000 |
| C | -1.059724000000 | 3.694639000000  | -0.443524000000 |
| H | -3.048316000000 | 4.532207000000  | -0.310757000000 |
| H | -0.567621000000 | -4.649580000000 | -0.602109000000 |
| H | -0.567621000000 | 4.649583000000  | -0.602085000000 |
| C | -0.045091000000 | 0.000000000000  | -0.079677000000 |
| C | 0.746103000000  | -0.000004000000 | 1.244371000000  |
| C | 1.103757000000  | 0.000004000000  | -1.097786000000 |
| C | 0.255904000000  | -0.000008000000 | 2.544528000000  |
| C | 2.132298000000  | -0.000004000000 | 1.001169000000  |
| C | 1.023980000000  | 0.000010000000  | -2.485394000000 |
| C | 2.354110000000  | 0.000002000000  | -0.451814000000 |
| C | 1.163257000000  | -0.000012000000 | 3.609665000000  |
| H | -0.814325000000 | -0.000009000000 | 2.733744000000  |
| C | 3.037051000000  | -0.000008000000 | 2.064914000000  |
| C | 2.206829000000  | 0.000012000000  | -3.232450000000 |
| H | 0.057427000000  | 0.000012000000  | -2.982340000000 |
| C | 3.535027000000  | 0.000004000000  | -1.198580000000 |
| C | 2.542066000000  | -0.000012000000 | 3.370818000000  |
| H | 0.793580000000  | -0.000015000000 | 4.631623000000  |
| H | 4.109157000000  | -0.000008000000 | 1.884344000000  |
| C | 3.451639000000  | 0.000009000000  | -2.592535000000 |
| H | 2.158605000000  | 0.000016000000  | -4.318092000000 |

|                                        |                |                |                |
|----------------------------------------|----------------|----------------|----------------|
| H                                      | 4.50454000000  | 0.00000200000  | -0.70682900000 |
| H                                      | 3.23401700000  | -0.00001500000 | 4.20889400000  |
| H                                      | 4.36214400000  | 0.00001100000  | -3.18601900000 |
| H                                      | -3.94462300000 | -0.00000100000 | 0.16867100000  |
| <b>DPA (S<sub>0</sub>, Gas Phase)</b>  |                |                |                |
| <i>E</i> = -518.651797211 Hartree      |                |                |                |
| N                                      | 0.00000000000  | 1.03365500000  | 0.00000300000  |
| C                                      | -1.26693900000 | 0.44004200000  | -0.01913100000 |
| C                                      | -1.49989500000 | -0.85276400000 | -0.52101600000 |
| C                                      | -2.36492600000 | 1.19396300000  | 0.43419500000  |
| C                                      | -2.79324300000 | -1.37240500000 | -0.54258400000 |
| H                                      | -0.67598300000 | -1.43608500000 | -0.91608000000 |
| C                                      | -3.65352300000 | 0.66959000000  | 0.39166500000  |
| H                                      | -2.19676100000 | 2.19454200000  | 0.82734500000  |
| C                                      | -3.87929000000 | -0.62231700000 | -0.08840600000 |
| H                                      | -2.95112400000 | -2.37352300000 | -0.93591700000 |
| H                                      | -4.48459800000 | 1.27365800000  | 0.74668900000  |
| H                                      | -4.88355500000 | -1.03488600000 | -0.11186500000 |
| C                                      | 1.26693900000  | 0.44004200000  | 0.01913300000  |
| C                                      | 1.49989700000  | -0.85276300000 | 0.52101900000  |
| C                                      | 2.36492400000  | 1.19396300000  | -0.43419600000 |
| C                                      | 2.79324500000  | -1.37240400000 | 0.54258400000  |
| H                                      | 0.67598500000  | -1.43608400000 | 0.91608600000  |
| C                                      | 3.65352200000  | 0.66959100000  | -0.39166900000 |
| H                                      | 2.19675900000  | 2.19454100000  | -0.82734700000 |
| C                                      | 3.87929100000  | -0.62231700000 | 0.08840300000  |
| H                                      | 2.95112600000  | -2.37352200000 | 0.93591800000  |
| H                                      | 4.48459600000  | 1.27365800000  | -0.74669600000 |
| H                                      | 4.88355500000  | -1.03488500000 | 0.11186000000  |
| H                                      | 0.00000000000  | 2.04367500000  | 0.00000500000  |
| <b>DPAS (S<sub>0</sub>, Gas Phase)</b> |                |                |                |
| <i>E</i> = -1270.28823604 Hartree      |                |                |                |
| N                                      | -2.97551200000 | -0.00091400000 | -0.00001100000 |
| C                                      | -2.38749200000 | 0.68667200000  | 1.05789600000  |
| C                                      | -2.38709000000 | -0.68970900000 | -1.05691000000 |
| C                                      | -0.98611700000 | 0.79977100000  | 1.22051800000  |
| C                                      | -3.25584200000 | 1.28742100000  | 1.99370200000  |
| C                                      | -0.98565100000 | -0.80272700000 | -1.21905900000 |
| C                                      | -3.25510100000 | -1.29179000000 | -1.99217300000 |

|                                        |                 |                 |                 |
|----------------------------------------|-----------------|-----------------|-----------------|
| C                                      | -0.515584000000 | 1.517031000000  | 2.337432000000  |
| Si                                     | 0.188693000000  | -0.000094000000 | 0.000047000000  |
| C                                      | -2.751718000000 | 1.988606000000  | 3.078567000000  |
| H                                      | -4.332385000000 | 1.195502000000  | 1.858901000000  |
| C                                      | -0.514727000000 | -1.521609000000 | -2.334767000000 |
| C                                      | -2.750591000000 | -1.994374000000 | -3.075952000000 |
| H                                      | -4.331693000000 | -1.199887000000 | -1.857754000000 |
| C                                      | -1.369372000000 | 2.109641000000  | 3.261526000000  |
| H                                      | 0.558934000000  | 1.609881000000  | 2.482669000000  |
| H                                      | -3.440258000000 | 2.442355000000  | 3.786835000000  |
| H                                      | 0.559841000000  | -1.614670000000 | -2.479500000000 |
| C                                      | -1.368180000000 | -2.115605000000 | -3.258280000000 |
| H                                      | -3.438877000000 | -2.449161000000 | -3.783801000000 |
| H                                      | -0.970689000000 | 2.655813000000  | 4.111350000000  |
| H                                      | -0.969189000000 | -2.662972000000 | -4.107190000000 |
| C                                      | 1.291082000000  | 1.301229000000  | -0.822143000000 |
| C                                      | 2.501670000000  | 0.950769000000  | -1.449990000000 |
| C                                      | 0.890569000000  | 2.648599000000  | -0.886555000000 |
| C                                      | 3.276305000000  | 1.901794000000  | -2.116313000000 |
| H                                      | 2.853408000000  | -0.077741000000 | -1.409709000000 |
| C                                      | 1.662580000000  | 3.604906000000  | -1.548336000000 |
| H                                      | -0.035651000000 | 2.956387000000  | -0.407303000000 |
| C                                      | 2.857519000000  | 3.232590000000  | -2.166430000000 |
| H                                      | 4.207752000000  | 1.605183000000  | -2.592353000000 |
| H                                      | 1.332265000000  | 4.640284000000  | -1.580371000000 |
| H                                      | 3.460530000000  | 3.975698000000  | -2.682249000000 |
| C                                      | 1.295264000000  | -1.298654000000 | 0.820909000000  |
| C                                      | 2.506688000000  | -0.945499000000 | 1.445617000000  |
| C                                      | 0.897195000000  | -2.646646000000 | 0.887587000000  |
| C                                      | 3.284473000000  | -1.894543000000 | 2.111109000000  |
| H                                      | 2.856567000000  | 0.083566000000  | 1.403480000000  |
| C                                      | 1.672357000000  | -3.600969000000 | 1.548532000000  |
| H                                      | -0.029597000000 | -2.956496000000 | 0.410773000000  |
| C                                      | 2.868082000000  | -3.225995000000 | 2.163507000000  |
| H                                      | 4.216505000000  | -1.595868000000 | 2.584709000000  |
| H                                      | 1.343890000000  | -4.636878000000 | 1.582355000000  |
| H                                      | 3.473545000000  | -3.967562000000 | 2.678672000000  |
| H                                      | -3.985928000000 | -0.001165000000 | -0.000041000000 |
| <b>ICbz (S<sub>0</sub>, Gas Phase)</b> |                 |                 |                 |
| <i>E</i> = -802.687427094 Hartree      |                 |                 |                 |
| N                                      | 1.616125000000  | -1.437900000000 | -0.027420000000 |

|                                        |                 |                 |                 |
|----------------------------------------|-----------------|-----------------|-----------------|
| C                                      | 0.698421000000  | -0.392554000000 | -0.001770000000 |
| C                                      | 2.901135000000  | -0.909536000000 | -0.003012000000 |
| C                                      | -0.698423000000 | -0.392555000000 | 0.001798000000  |
| C                                      | 1.395056000000  | 0.839708000000  | -0.013531000000 |
| C                                      | 4.131476000000  | -1.568877000000 | 0.017987000000  |
| C                                      | 2.806176000000  | 0.507684000000  | -0.016761000000 |
| C                                      | -1.395056000000 | 0.839706000000  | 0.013556000000  |
| N                                      | -1.616124000000 | -1.437912000000 | 0.027503000000  |
| C                                      | 0.692681000000  | 2.063723000000  | -0.010041000000 |
| C                                      | 5.284328000000  | -0.786622000000 | 0.019097000000  |
| H                                      | 4.190460000000  | -2.654165000000 | 0.031031000000  |
| C                                      | 3.982454000000  | 1.268594000000  | -0.022279000000 |
| C                                      | -0.692682000000 | 2.063723000000  | 0.010082000000  |
| C                                      | -2.806177000000 | 0.507683000000  | 0.016761000000  |
| C                                      | -2.901135000000 | -0.909536000000 | 0.003030000000  |
| H                                      | -1.402592000000 | -2.401909000000 | -0.175350000000 |
| H                                      | 1.239805000000  | 3.002105000000  | -0.017437000000 |
| C                                      | 5.212716000000  | 0.617636000000  | -0.003609000000 |
| H                                      | 6.255864000000  | -1.272974000000 | 0.035665000000  |
| H                                      | 3.934719000000  | 2.354331000000  | -0.036726000000 |
| H                                      | -1.239806000000 | 3.002105000000  | 0.017482000000  |
| C                                      | -3.982454000000 | 1.268594000000  | 0.022247000000  |
| C                                      | -4.131475000000 | -1.568875000000 | -0.017996000000 |
| H                                      | 6.130108000000  | 1.199441000000  | -0.005485000000 |
| C                                      | -5.212716000000 | 0.617637000000  | 0.003550000000  |
| H                                      | -3.934718000000 | 2.354332000000  | 0.036691000000  |
| C                                      | -5.284328000000 | -0.786621000000 | -0.019149000000 |
| H                                      | -4.190458000000 | -2.654164000000 | -0.031028000000 |
| H                                      | -6.130107000000 | 1.199442000000  | 0.005401000000  |
| H                                      | -6.255864000000 | -1.272973000000 | -0.035741000000 |
| H                                      | 1.402583000000  | -2.401949000000 | 0.175157000000  |
| <b>DPAC (S<sub>0</sub>, Gas Phase)</b> |                 |                 |                 |
| <i>E</i> = -1018.86294087 Hartree      |                 |                 |                 |
| N                                      | 2.637351000000  | 0.000881000000  | 0.481742000000  |
| C                                      | 1.972627000000  | -1.207555000000 | 0.696293000000  |
| C                                      | 1.971893000000  | 1.208986000000  | 0.695933000000  |
| C                                      | 0.569984000000  | -1.248076000000 | 0.571417000000  |
| C                                      | 2.691764000000  | -2.358685000000 | 1.048501000000  |
| C                                      | 0.569228000000  | 1.248595000000  | 0.571007000000  |
| C                                      | 2.690328000000  | 2.360677000000  | 1.047735000000  |
| C                                      | -0.077600000000 | -2.458179000000 | 0.844116000000  |

|                                         |                 |                 |                 |
|-----------------------------------------|-----------------|-----------------|-----------------|
| C                                       | 2.024235000000  | -3.554747000000 | 1.290315000000  |
| H                                       | 3.774579000000  | -2.303774000000 | 1.142271000000  |
| C                                       | -0.079111000000 | 2.458339000000  | 0.843460000000  |
| C                                       | 2.022056000000  | 3.556391000000  | 1.289228000000  |
| H                                       | 3.773182000000  | 2.306471000000  | 1.141462000000  |
| C                                       | 0.632137000000  | -3.606278000000 | 1.199404000000  |
| H                                       | -1.158674000000 | -2.504583000000 | 0.762584000000  |
| H                                       | 2.591431000000  | -4.440523000000 | 1.563501000000  |
| H                                       | -1.160231000000 | 2.504012000000  | 0.762178000000  |
| C                                       | 0.629919000000  | 3.606990000000  | 1.198420000000  |
| H                                       | 2.588704000000  | 4.442614000000  | 1.562102000000  |
| H                                       | 0.100807000000  | -4.533028000000 | 1.395179000000  |
| H                                       | 0.098002000000  | 4.533443000000  | 1.394011000000  |
| C                                       | -0.160172000000 | -0.000024000000 | 0.032298000000  |
| C                                       | -1.632900000000 | -0.000339000000 | 0.506285000000  |
| C                                       | -2.719636000000 | -0.001011000000 | -0.374127000000 |
| C                                       | -1.901602000000 | -0.000129000000 | 1.886744000000  |
| C                                       | -4.034148000000 | -0.001412000000 | 0.106410000000  |
| H                                       | -2.548245000000 | -0.001234000000 | -1.444467000000 |
| C                                       | -3.208112000000 | -0.000514000000 | 2.367424000000  |
| H                                       | -1.072383000000 | 0.000343000000  | 2.588365000000  |
| C                                       | -4.285136000000 | -0.001152000000 | 1.475935000000  |
| H                                       | -4.859858000000 | -0.001929000000 | -0.600593000000 |
| H                                       | -3.386303000000 | -0.000324000000 | 3.439780000000  |
| H                                       | -5.306083000000 | -0.001454000000 | 1.848586000000  |
| C                                       | -0.071168000000 | -0.000263000000 | -1.528384000000 |
| C                                       | -0.056680000000 | 1.200327000000  | -2.253620000000 |
| C                                       | -0.054579000000 | -1.201044000000 | -2.253263000000 |
| C                                       | -0.026747000000 | 1.201580000000  | -3.649180000000 |
| H                                       | -0.062593000000 | 2.148464000000  | -1.727565000000 |
| C                                       | -0.024627000000 | -1.202657000000 | -3.648827000000 |
| H                                       | -0.058779000000 | -2.149022000000 | -1.726905000000 |
| C                                       | -0.008907000000 | -0.000630000000 | -4.355939000000 |
| H                                       | -0.012300000000 | 2.149117000000  | -4.182007000000 |
| H                                       | -0.008467000000 | -2.150319000000 | -4.181384000000 |
| H                                       | 0.019691000000  | -0.000768000000 | -5.442441000000 |
| H                                       | 3.627783000000  | 0.001193000000  | 0.687639000000  |
| <b>SSiAS (S<sub>0</sub>, Gas Phase)</b> |                 |                 |                 |
| <i>E</i> = -1269.09505244 Hartree       |                 |                 |                 |
| N                                       | -3.211160000000 | 0.000010000000  | 0.000844000000  |
| C                                       | -2.622262000000 | -1.261224000000 | 0.000379000000  |

|    |                 |                 |                 |
|----|-----------------|-----------------|-----------------|
| C  | -2.622252000000 | 1.261239000000  | 0.000090000000  |
| C  | -1.220600000000 | -1.457992000000 | -0.000186000000 |
| C  | -3.487922000000 | -2.375501000000 | 0.000407000000  |
| C  | -1.220588000000 | 1.457996000000  | -0.000519000000 |
| C  | -3.487902000000 | 2.375522000000  | 0.000065000000  |
| C  | -0.744163000000 | -2.783520000000 | -0.000808000000 |
| C  | -2.979482000000 | -3.665346000000 | -0.000157000000 |
| H  | -4.564895000000 | -2.215412000000 | 0.000845000000  |
| C  | -0.744141000000 | 2.783520000000  | -0.001200000000 |
| C  | -2.979453000000 | 3.665364000000  | -0.000597000000 |
| H  | -4.564877000000 | 2.215442000000  | 0.000553000000  |
| C  | -1.596047000000 | -3.881879000000 | -0.000794000000 |
| H  | 0.331113000000  | -2.949898000000 | -0.001337000000 |
| H  | -3.665623000000 | -4.508451000000 | -0.000125000000 |
| H  | 0.331137000000  | 2.949889000000  | -0.001674000000 |
| C  | -1.596016000000 | 3.881885000000  | -0.001255000000 |
| H  | -3.665587000000 | 4.508474000000  | -0.000622000000 |
| H  | -1.195982000000 | -4.891498000000 | -0.001284000000 |
| H  | -1.195942000000 | 4.891501000000  | -0.001770000000 |
| C  | 1.265692000000  | 0.000719000000  | 1.344773000000  |
| C  | 1.266202000000  | -0.000732000000 | -1.344532000000 |
| C  | 1.156391000000  | 0.000627000000  | 2.736577000000  |
| C  | 2.550718000000  | 0.000141000000  | 0.745453000000  |
| C  | 1.157428000000  | -0.000641000000 | -2.736379000000 |
| C  | 2.551001000000  | -0.000151000000 | -0.744721000000 |
| C  | 2.301555000000  | 0.000289000000  | 3.539040000000  |
| H  | 0.174838000000  | 0.000947000000  | 3.206157000000  |
| C  | 3.693650000000  | -0.000209000000 | 1.552861000000  |
| C  | 2.302895000000  | -0.000302000000 | -3.538407000000 |
| H  | 0.176053000000  | -0.000963000000 | -3.206328000000 |
| C  | 3.694238000000  | 0.000200000000  | -1.551698000000 |
| C  | 3.564639000000  | -0.000113000000 | 2.943199000000  |
| H  | 2.210325000000  | 0.000289000000  | 4.622114000000  |
| H  | 4.685968000000  | -0.000660000000 | 1.109637000000  |
| C  | 3.565753000000  | 0.000103000000  | -2.942085000000 |
| H  | 2.212078000000  | -0.000303000000 | -4.621516000000 |
| H  | 4.686387000000  | 0.000653000000  | -1.108097000000 |
| H  | 4.456856000000  | -0.000424000000 | 3.564396000000  |
| H  | 4.458206000000  | 0.000414000000  | -3.562942000000 |
| Si | -0.056165000000 | -0.000003000000 | -0.000147000000 |
| H  | -4.221631000000 | 0.000014000000  | 0.001087000000  |

**Cbz** ( $S_0$ , Gas Phase) $E = -517.470608899$  Hartree

|   |                 |                 |                 |
|---|-----------------|-----------------|-----------------|
| N | 0.000000000000  | 1.653832000000  | 0.000010000000  |
| C | 1.133686000000  | 0.855630000000  | -0.000309000000 |
| C | -1.133686000000 | 0.855630000000  | 0.000309000000  |
| C | 2.481722000000  | 1.221302000000  | -0.000516000000 |
| C | 0.725231000000  | -0.505236000000 | 0.000614000000  |
| C | -2.481722000000 | 1.221302000000  | 0.000510000000  |
| C | -0.725231000000 | -0.505236000000 | -0.000608000000 |
| C | 3.428756000000  | 0.199589000000  | -0.000187000000 |
| H | 2.783634000000  | 2.265368000000  | -0.000464000000 |
| C | 1.699364000000  | -1.510871000000 | 0.000724000000  |
| C | -3.428756000000 | 0.199589000000  | 0.000178000000  |
| H | -2.783634000000 | 2.265368000000  | 0.000459000000  |
| C | -1.699364000000 | -1.510871000000 | -0.000719000000 |
| C | 3.044918000000  | -1.153136000000 | 0.000260000000  |
| H | 4.484856000000  | 0.455578000000  | -0.000313000000 |
| H | 1.408600000000  | -2.558241000000 | 0.000911000000  |
| C | -3.044918000000 | -1.153136000000 | -0.000264000000 |
| H | -4.484856000000 | 0.455578000000  | 0.000301000000  |
| H | -1.408600000000 | -2.558241000000 | -0.000904000000 |
| H | 3.808563000000  | -1.925687000000 | 0.000020000000  |
| H | -3.808563000000 | -1.925687000000 | -0.000024000000 |
| H | 0.000000000000  | 2.661813000000  | 0.000004000000  |
